# Supplementary material for: Chronic Physical Disturbance Substantially Alters the Response of Biological Soil Crusts to a Wetting Pulse, as Characterized by Metatranscriptomic Sequencing
Source: Front Microbiol. 2018 Oct 8;9:2382. doi: 10.3389/fmicb.2018.02382 (PMC6186815; doi:10.3389/fmicb.2018.02382)
Supplement: TABLE S1 — Taxonomic and functional annotations of differentially abundant contigs in biocrusts. Mean counts are the average across wet and dry samples (n = 6). The number of contigs is not equal to the number shown in Figure 8A as many contigs could not be annotated. [file Table_1.xls]

## Sheet: Biocrust.tsv
		SEED annotation
contig	LCA taxonomy	level1	level2	function	mean counts	log2 fold change	pvalue	pvalue adjusted (Benjamin Hochberg)
Enriched in dry biocrusts
k119_123360	Rubrobacter	Amino_Acids_and_Derivatives	A_Hypothetical_Protein_Related_to_Proline_Metabolism	Pyrroline_5_carboxylate_reductase_(EC_1.5.1.2)	2.19297	4.28708	0.00993207	0.0754829
k119_193790	Rubrobacter	Amino_Acids_and_Derivatives	A_Hypothetical_Protein_Related_to_Proline_Metabolism	Pyrroline_5_carboxylate_reductase_(EC_1.5.1.2)	10.9092	2.54349	0.00785795	0.0672033
k119_66466	Rubrobacter	Amino_Acids_and_Derivatives	Alanine_biosynthesis	Alanine_racemase_(EC_5.1.1.1)	3.03447	5.59366	0.000263726	0.0118395
k119_310444	Rubrobacter xylanophilus	Amino_Acids_and_Derivatives	Alanine_biosynthesis	Alanine_racemase_(EC_5.1.1.1)	7.22613	5.23432	0.000146979	0.00850497
k119_166357	Rubrobacter	Amino_Acids_and_Derivatives	Alanine_biosynthesis	Branched_chain_amino_acid_aminotransferase_(EC_2.6.1.42)	3.48392	5.47241	0.000195473	0.00997536
k119_66943	Nitrososphaera	Amino_Acids_and_Derivatives	Alanine_biosynthesis	Branched_chain_amino_acid_aminotransferase_(EC_2.6.1.42)	4.1838	5.37628	0.000805828	0.0216895
k119_186299	Rubrobacter xylanophilus	Amino_Acids_and_Derivatives	Alanine_biosynthesis	Branched_chain_amino_acid_aminotransferase_(EC_2.6.1.42)	2.98939	5.1031	0.00226026	0.0360889
k119_226863	Rubrobacter	Amino_Acids_and_Derivatives	Alanine_biosynthesis	Branched_chain_amino_acid_aminotransferase_(EC_2.6.1.42)	2.36884	4.14072	0.014411	0.0921024
k119_528572	Bacteria	Amino_Acids_and_Derivatives	Alanine_biosynthesis	Branched_chain_amino_acid_aminotransferase_(EC_2.6.1.42)	3.98752	4.11539	0.0106221	0.0780349
k119_250002	Solirubrobacterales	Amino_Acids_and_Derivatives	Alanine_biosynthesis	Branched_chain_amino_acid_aminotransferase_(EC_2.6.1.42)	2.66524	4.062	0.0150375	0.0942047
k119_365024	Rubrobacter	Amino_Acids_and_Derivatives	Alanine_biosynthesis	Branched_chain_amino_acid_aminotransferase_(EC_2.6.1.42)	4.00568	3.35821	0.00545985	0.0555564
k119_97930	Rubrobacter	Amino_Acids_and_Derivatives	Alanine_biosynthesis	Cysteine_desulfurase_(EC_2.8.1.7)	2.28123	4.83305	0.00232386	0.036645
k119_279943	Terrabacteria group	Amino_Acids_and_Derivatives	Alanine_biosynthesis	Cysteine_desulfurase_(EC_2.8.1.7)	2.65564	3.80147	0.00702462	0.0633658
k119_550981	Solirubrobacterales	Amino_Acids_and_Derivatives	Alanine_biosynthesis	Cysteine_desulfurase_(EC_2.8.1.7)_SufS_subfamily	4.08872	4.67401	0.00248438	0.0376253
k119_294537	Nocardioidaceae	Amino_Acids_and_Derivatives	Alanine_biosynthesis	Cysteine_desulfurase_(EC_2.8.1.7)_SufS_subfamily	6.00728	3.90516	0.0133406	0.0883565
k119_310782	Bacteria	Amino_Acids_and_Derivatives	Alanine_biosynthesis	Valine__pyruvate_aminotransferase_(EC_2.6.1.66)	3.06249	3.91757	0.00549937	0.0557436
k119_266139	Rubrobacter	Amino_Acids_and_Derivatives	Alanine_serine_glycine_metabolism_in_plants	D_3_phosphoglycerate_dehydrogenase_(EC_1.1.1.95)	3.06657	4.63018	0.0158694	0.0970675
k119_269816	Rubrobacter	Amino_Acids_and_Derivatives	Alanine_serine_glycine_metabolism_in_plants	D_3_phosphoglycerate_dehydrogenase_(EC_1.1.1.95)	4.30045	4.29591	0.00124954	0.0267323
k119_350288	Rubrobacter	Amino_Acids_and_Derivatives	Alanine_serine_glycine_metabolism_in_plants	Phosphoserine_phosphatase_(EC_3.1.3.3)	2.71133	4.30544	0.0124911	0.0852118
k119_82454	Rubrobacter	Amino_Acids_and_Derivatives	Alanine_serine_glycine_metabolism_in_plants	Serine__glyoxylate_aminotransferase_(EC_2.6.1.45)	2.14569	4.23912	0.0140447	0.0909055
k119_527862	Rubrobacter	Amino_Acids_and_Derivatives	Alanine_serine_glycine_metabolism_in_plants	Serine_hydroxymethyltransferase_(EC_2.1.2.1)	4.42901	5.19337	0.00234664	0.0367456
k119_398638	Rubrobacter	Amino_Acids_and_Derivatives	Alanine_serine_glycine_metabolism_in_plants	Serine_hydroxymethyltransferase_(EC_2.1.2.1)	2.46597	4.83622	0.00746497	0.0654486
k119_368688	Rubrobacter	Amino_Acids_and_Derivatives	Alanine_serine_glycine_metabolism_in_plants	Serine_hydroxymethyltransferase_(EC_2.1.2.1)	2.64924	4.03699	0.00893722	0.0715888
k119_300898	Actinobacteria <phylum>	Amino_Acids_and_Derivatives	Alanine_serine_glycine_metabolism_in_plants	Serine_hydroxymethyltransferase_(EC_2.1.2.1)	3.94146	3.68638	0.00375746	0.0460225
k119_10415	Rubrobacter	Amino_Acids_and_Derivatives	Amino_acid_racemase	Glutamate_racemase_(EC_5.1.1.3)	4.54221	4.00675	0.00289045	0.0404187
k119_83454	Streptosporangiales	Amino_Acids_and_Derivatives	Arginine_and_Ornithine_Degradation	Arginine_deiminase_(EC_3.5.3.6)	2.63972	5.04766	0.00580449	0.0573941
k119_15492	Rubrobacter	Amino_Acids_and_Derivatives	Arginine_and_Ornithine_Degradation	Arginine_pathway_regulatory_protein_ArgR_repressor_of_arg_regulon	3.20943	4.61365	0.00303108	0.0414651
k119_588198	Rubrobacter	Amino_Acids_and_Derivatives	Arginine_and_Ornithine_Degradation	Delta_1_pyrroline_5_carboxylate_dehydrogenase_(EC_1.5.1.12)	3.46901	3.83602	0.0110849	0.0798665
k119_276980	Rubrobacter	Amino_Acids_and_Derivatives	Arginine_and_Ornithine_Degradation	Delta_1_pyrroline_5_carboxylate_dehydrogenase_(EC_1.5.1.12)	3.79674	3.26434	0.010927	0.0791221
k119_215249	Bacteria	Amino_Acids_and_Derivatives	Arginine_and_Ornithine_Degradation	NADP_specific_glutamate_dehydrogenase_(EC_1.4.1.4)	2.835	5.18155	0.00132947	0.0275335
k119_584734	Nitrososphaera	Amino_Acids_and_Derivatives	Arginine_and_Ornithine_Degradation	NADP_specific_glutamate_dehydrogenase_(EC_1.4.1.4)	2.87783	5.0799	0.00209361	0.0347848
k119_357858	Sphingomonadales	Amino_Acids_and_Derivatives	Arginine_and_Ornithine_Degradation	NADP_specific_glutamate_dehydrogenase_(EC_1.4.1.4)	5.70026	5.07281	0.000988156	0.0240193
k119_231763	Bacteria	Amino_Acids_and_Derivatives	Arginine_and_Ornithine_Degradation	NADP_specific_glutamate_dehydrogenase_(EC_1.4.1.4)	5.51954	4.42161	0.00364379	0.0454668
k119_275963	Thaumarchaeota	Amino_Acids_and_Derivatives	Arginine_and_Ornithine_Degradation	Ornithine_carbamoyltransferase_(EC_2.1.3.3)	2.90675	5.10022	0.00534379	0.0550346
k119_15273	Rubrobacter	Amino_Acids_and_Derivatives	Arginine_and_Ornithine_Degradation	Ornithine_carbamoyltransferase_(EC_2.1.3.3)	4.82207	4.60389	0.000913284	0.023116
k119_304288	Rubrobacter	Amino_Acids_and_Derivatives	Arginine_and_Ornithine_Degradation	Ornithine_carbamoyltransferase_(EC_2.1.3.3)	2.16181	4.04693	0.0120553	0.0836055
k119_22506	Rubrobacter	Amino_Acids_and_Derivatives	Arginine_and_Ornithine_Degradation	Ornithine_carbamoyltransferase_(EC_2.1.3.3)	5.85063	3.9405	0.00198039	0.0337498
k119_524772	Bacteria	Amino_Acids_and_Derivatives	Arginine_and_Ornithine_Degradation	Ornithine_cyclodeaminase_(EC_4.3.1.12)	4.0005	5.35835	0.00339399	0.0439181
k119_212011	Rubrobacter	Amino_Acids_and_Derivatives	Arginine_and_Ornithine_Degradation	Ornithine_cyclodeaminase_(EC_4.3.1.12)	3.47594	5.02943	0.00148115	0.0292329
k119_392145	Rubrobacter	Amino_Acids_and_Derivatives	Arginine_Biosynthesis_extended	Acetylornithine_aminotransferase_(EC_2.6.1.11)	2.9597	4.63176	0.016546	0.0993258
k119_433	Rubrobacter	Amino_Acids_and_Derivatives	Arginine_Biosynthesis_extended	Acetylornithine_aminotransferase_(EC_2.6.1.11)	2.6655	4.37861	0.0120777	0.0836871
k119_71383	Rubrobacter	Amino_Acids_and_Derivatives	Arginine_Biosynthesis_extended	Acetylornithine_aminotransferase_(EC_2.6.1.11)	4.24045	4.19931	0.00546877	0.0555817
k119_116198	Rubrobacter	Amino_Acids_and_Derivatives	Arginine_Biosynthesis_extended	Acetylornithine_aminotransferase_(EC_2.6.1.11)	2.91252	3.34588	0.0164251	0.0989336
k119_108332	Rubrobacter	Amino_Acids_and_Derivatives	Arginine_Biosynthesis_extended	Acetylornithine_deacetylase_(EC_3.5.1.16)	3.66101	5.37901	0.00152041	0.0295563
k119_514070	Rubrobacter	Amino_Acids_and_Derivatives	Arginine_Biosynthesis_extended	Acetylornithine_deacetylase_(EC_3.5.1.16)	2.33491	4.89987	0.00754535	0.0658272
k119_433863	Acidobacteria	Amino_Acids_and_Derivatives	Arginine_Biosynthesis_extended	Argininosuccinate_synthase_(EC_6.3.4.5)	6.32481	5.52518	0.00800392	0.0678337
k119_369575	Thaumarchaeota	Amino_Acids_and_Derivatives	Arginine_Biosynthesis_extended	Argininosuccinate_synthase_(EC_6.3.4.5)	3.47266	5.50636	0.000729296	0.0205669
k119_460566	Rubrobacter	Amino_Acids_and_Derivatives	Arginine_Biosynthesis_extended	Argininosuccinate_synthase_(EC_6.3.4.5)	4.66394	4.85278	0.00301438	0.0413486
k119_437674	Actinobacteria <phylum>	Amino_Acids_and_Derivatives	Arginine_Biosynthesis_extended	Argininosuccinate_synthase_(EC_6.3.4.5)	3.28577	4.52252	0.00638089	0.0602708
k119_346061	Rubrobacter	Amino_Acids_and_Derivatives	Arginine_Biosynthesis_extended	Argininosuccinate_synthase_(EC_6.3.4.5)	4.63538	4.18477	0.0136557	0.0894793
k119_254547	Rubrobacter	Amino_Acids_and_Derivatives	Arginine_Biosynthesis_extended	Argininosuccinate_synthase_(EC_6.3.4.5)	3.25226	3.56718	0.0117035	0.0822695
k119_230372	Rubrobacter	Amino_Acids_and_Derivatives	Arginine_Biosynthesis_extended	N_acetyl_gamma_glutamyl_phosphate_reductase_(EC_1.2.1.38)	4.40177	6.18643	3.23433e-05	0.00321233
k119_550512	Rubrobacter	Amino_Acids_and_Derivatives	Arginine_Biosynthesis_extended	N_acetyl_gamma_glutamyl_phosphate_reductase_(EC_1.2.1.38)	3.90987	5.5443	0.0023801	0.0370411
k119_492187	Rubrobacter	Amino_Acids_and_Derivatives	Arginine_Biosynthesis_extended	N_acetyl_gamma_glutamyl_phosphate_reductase_(EC_1.2.1.38)	3.03342	5.38391	0.000479348	0.0163433
k119_15492	Rubrobacter	Amino_Acids_and_Derivatives	Arginine_Biosynthesis_extended	N_acetyl_gamma_glutamyl_phosphate_reductase_(EC_1.2.1.38)	3.20943	4.61365	0.00303108	0.0414651
k119_407281	Thermomicrobia	Amino_Acids_and_Derivatives	Arginine_deiminase_and_agmatine_deiminase_pathways_in_Streptococci	Aspartate_aminotransferase_(EC_2.6.1.1)	2.93648	4.22896	0.00863469	0.0705264
k119_321916	Rubrobacter xylanophilus	Amino_Acids_and_Derivatives	Arginine_deiminase_and_agmatine_deiminase_pathways_in_Streptococci	Aspartate_aminotransferase_(EC_2.6.1.1)	16.3879	3.91721	1.09415e-05	0.00155482
k119_361111	Bacteria	Amino_Acids_and_Derivatives	Arginine_deiminase_and_agmatine_deiminase_pathways_in_Streptococci	Spermidine_synthase_(EC_2.5.1.16)	6.27844	5.33399	0.00234366	0.0367223
k119_187319	Rubrobacter	Amino_Acids_and_Derivatives	Arginine_metabolism_and_urea_cycle_in_plants	Carbamoyl_phosphate_synthase_large_chain_(EC_6.3.5.5)	3.53517	5.52776	0.000870441	0.0226003
k119_513738	Bacteria	Amino_Acids_and_Derivatives	Arginine_metabolism_and_urea_cycle_in_plants	Carbamoyl_phosphate_synthase_large_chain_(EC_6.3.5.5)	3.01775	5.09669	0.00156116	0.0298938
k119_141975	Nitrososphaera	Amino_Acids_and_Derivatives	Arginine_metabolism_and_urea_cycle_in_plants	Carbamoyl_phosphate_synthase_large_chain_(EC_6.3.5.5)	2.70351	4.99619	0.00515617	0.05409
k119_185584	Rubrobacter	Amino_Acids_and_Derivatives	Arginine_metabolism_and_urea_cycle_in_plants	Carbamoyl_phosphate_synthase_large_chain_(EC_6.3.5.5)	3.22379	4.91212	0.0062247	0.0594581
k119_97605	Bacteria	Amino_Acids_and_Derivatives	Arginine_metabolism_and_urea_cycle_in_plants	Carbamoyl_phosphate_synthase_large_chain_(EC_6.3.5.5)	6.23204	4.68649	0.000461436	0.0161293
k119_241310	Rubrobacter	Amino_Acids_and_Derivatives	Arginine_metabolism_and_urea_cycle_in_plants	Carbamoyl_phosphate_synthase_large_chain_(EC_6.3.5.5)	5.26221	4.19176	0.00448825	0.0504195
k119_475810	Rubrobacter	Amino_Acids_and_Derivatives	Arginine_metabolism_and_urea_cycle_in_plants	Carbamoyl_phosphate_synthase_large_chain_(EC_6.3.5.5)	2.86707	3.76091	0.00873514	0.0709377
k119_197527	Rubrobacter	Amino_Acids_and_Derivatives	Arginine_metabolism_and_urea_cycle_in_plants	Carbamoyl_phosphate_synthase_large_chain_(EC_6.3.5.5)	3.62983	3.44385	0.00573557	0.0570116
k119_368624	Rubrobacter	Amino_Acids_and_Derivatives	Arginine_metabolism_and_urea_cycle_in_plants	Carbamoyl_phosphate_synthase_small_chain_(EC_6.3.5.5)	3.90062	5.83865	3.57939e-05	0.00342611
k119_82631	Thaumarchaeota	Amino_Acids_and_Derivatives	Arginine_metabolism_and_urea_cycle_in_plants	Carbamoyl_phosphate_synthase_small_chain_(EC_6.3.5.5)	3.74216	4.93944	0.000962413	0.0237134
k119_427102	Rubrobacter	Amino_Acids_and_Derivatives	Arginine_metabolism_and_urea_cycle_in_plants	Carbamoyl_phosphate_synthase_small_chain_(EC_6.3.5.5)	3.37299	4.64724	0.01249	0.0852118
k119_197527	Rubrobacter	Amino_Acids_and_Derivatives	Arginine_metabolism_and_urea_cycle_in_plants	Carbamoyl_phosphate_synthase_small_chain_(EC_6.3.5.5)	3.62983	3.44385	0.00573557	0.0570116
k119_72864	Rubrobacter xylanophilus	Amino_Acids_and_Derivatives	Aromatic_amino_acid_degradation	2_hydroxyhepta_24_diene_17_dioate_isomerase_(EC_5.3.3._)	4.07425	5.8575	0.000390242	0.0147276
k119_186161	Terrabacteria group	Amino_Acids_and_Derivatives	Aromatic_amino_acid_degradation	Aromatic_amino_acid_transport_protein_AroP	2.70012	4.84419	0.00527346	0.0546182
k119_106531	Terrabacteria group	Amino_Acids_and_Derivatives	Aromatic_amino_acid_degradation	Aromatic_amino_acid_transport_protein_AroP	11.4403	4.59482	0.000592917	0.0183639
k119_56781	Bacteria	Amino_Acids_and_Derivatives	Aromatic_amino_acid_degradation	Aromatic_amino_acid_transport_protein_AroP	3.95952	3.97051	0.00814459	0.0684683
k119_122134	Rubrobacter xylanophilus	Amino_Acids_and_Derivatives	Aromatic_amino_acid_degradation	Kynurenine_formamidase_bacterial_(EC_3.5.1.9)	3.07504	5.5053	0.00051865	0.0169805
k119_515141	Rubrobacter	Amino_Acids_and_Derivatives	Branched_Chain_Amino_Acid_Biosynthesis	(R)_citramalate_synthase_(EC_2.3.1.182)	4.22652	4.51504	0.000960592	0.0236973
k119_78995	Rubrobacter	Amino_Acids_and_Derivatives	Branched_Chain_Amino_Acid_Biosynthesis	(R)_citramalate_synthase_(EC_2.3.1.182)	3.04027	3.91811	0.00926925	0.0729826
k119_166357	Rubrobacter	Amino_Acids_and_Derivatives	Branched_Chain_Amino_Acid_Biosynthesis	2_isopropylmalate_synthase_(EC_2.3.3.13)	3.48392	5.47241	0.000195473	0.00997536
k119_341783	Rubrobacter	Amino_Acids_and_Derivatives	Branched_Chain_Amino_Acid_Biosynthesis	2_isopropylmalate_synthase_(EC_2.3.3.13)	3.88711	4.99972	0.000972323	0.0238188
k119_44908	Thaumarchaeota	Amino_Acids_and_Derivatives	Branched_Chain_Amino_Acid_Biosynthesis	2_isopropylmalate_synthase_(EC_2.3.3.13)	5.16317	4.68005	0.00115607	0.0258572
k119_245397	Rubrobacter	Amino_Acids_and_Derivatives	Branched_Chain_Amino_Acid_Biosynthesis	2_isopropylmalate_synthase_(EC_2.3.3.13)	2.68746	4.63339	0.0070194	0.06334
k119_259568	Rubrobacter	Amino_Acids_and_Derivatives	Branched_Chain_Amino_Acid_Biosynthesis	2_isopropylmalate_synthase_(EC_2.3.3.13)	3.95065	3.59776	0.0102231	0.076716
k119_30077	Rubrobacter	Amino_Acids_and_Derivatives	Branched_Chain_Amino_Acid_Biosynthesis	2_isopropylmalate_synthase_(EC_2.3.3.13)	4.48075	3.53561	0.00507002	0.0535588
k119_413816	Terrabacteria group	Amino_Acids_and_Derivatives	Branched_Chain_Amino_Acid_Biosynthesis	3_isopropylmalate_dehydratase_large_subunit_(EC_4.2.1.33)	4.34859	3.8213	0.00373069	0.0458695
k119_42622	Terrabacteria group	Amino_Acids_and_Derivatives	Branched_Chain_Amino_Acid_Biosynthesis	3_isopropylmalate_dehydratase_small_subunit_(EC_4.2.1.33)	3.49409	4.20017	0.00169044	0.0311361
k119_78995	Rubrobacter	Amino_Acids_and_Derivatives	Branched_Chain_Amino_Acid_Biosynthesis	3_isopropylmalate_dehydrogenase_(EC_1.1.1.85)	3.04027	3.91811	0.00926925	0.0729826
k119_143978	Rubrobacter	Amino_Acids_and_Derivatives	Branched_Chain_Amino_Acid_Biosynthesis	Acetolactate_synthase_large_subunit_(EC_2.2.1.6)	2.97636	5.15309	0.000358397	0.0139828
k119_559517	Solirubrobacterales	Amino_Acids_and_Derivatives	Branched_Chain_Amino_Acid_Biosynthesis	Acetolactate_synthase_large_subunit_(EC_2.2.1.6)	3.75303	4.05358	0.00886911	0.0713452
k119_266597	Rubrobacter	Amino_Acids_and_Derivatives	Branched_Chain_Amino_Acid_Biosynthesis	Acetolactate_synthase_large_subunit_(EC_2.2.1.6)	7.96551	3.063	0.00494928	0.0529036
k119_17203	Terrabacteria group	Amino_Acids_and_Derivatives	Branched_Chain_Amino_Acid_Biosynthesis	Dihydroxy_acid_dehydratase_(EC_4.2.1.9)	4.60489	3.09225	0.0132033	0.0878088
k119_16057	Rubrobacter	Amino_Acids_and_Derivatives	Branched_Chain_Amino_Acid_Biosynthesis	Ketol_acid_reductoisomerase_(EC_1.1.1.86)	2.42959	5.20114	0.00106125	0.0247311
k119_186299	Rubrobacter xylanophilus	Amino_Acids_and_Derivatives	Branched_Chain_Amino_Acid_Biosynthesis	Ketol_acid_reductoisomerase_(EC_1.1.1.86)	2.98939	5.1031	0.00226026	0.0360889
k119_135777	Rubrobacter	Amino_Acids_and_Derivatives	Branched_Chain_Amino_Acid_Biosynthesis	Ketol_acid_reductoisomerase_(EC_1.1.1.86)	3.05801	4.66806	0.00301741	0.0413672
k119_447038	Rubrobacter	Amino_Acids_and_Derivatives	Branched_Chain_Amino_Acid_Biosynthesis	Ketol_acid_reductoisomerase_(EC_1.1.1.86)	2.49498	4.46174	0.00408754	0.0481843
k119_524853	Geodermatophilaceae	Amino_Acids_and_Derivatives	Branched_Chain_Amino_Acid_Biosynthesis	Ketol_acid_reductoisomerase_(EC_1.1.1.86)	4.80171	4.31709	0.00428088	0.0492478
k119_226863	Rubrobacter	Amino_Acids_and_Derivatives	Branched_Chain_Amino_Acid_Biosynthesis	Ketol_acid_reductoisomerase_(EC_1.1.1.86)	2.36884	4.14072	0.014411	0.0921024
k119_427019	Bacteria	Amino_Acids_and_Derivatives	Branched_chain_amino_acid_degradation_regulons	Acetoacetyl_CoA_synthetase_(EC_6.2.1.16)	4.0436	4.95681	0.00567841	0.0567348
k119_155736	Terrabacteria group	Amino_Acids_and_Derivatives	Branched_chain_amino_acid_degradation_regulons	Acetoacetyl_CoA_synthetase_(EC_6.2.1.16)	2.77483	4.88111	0.0044593	0.0502981
k119_214716	Bacteria	Amino_Acids_and_Derivatives	Branched_chain_amino_acid_degradation_regulons	Acetoacetyl_CoA_synthetase_(EC_6.2.1.16)	2.95895	4.7223	0.00643676	0.0605369
k119_420066	Terrabacteria group	Amino_Acids_and_Derivatives	Branched_chain_amino_acid_degradation_regulons	Acetoacetyl_CoA_synthetase_(EC_6.2.1.16)	2.88917	4.20876	0.0114156	0.081165
k119_517033	Rubrobacter	Amino_Acids_and_Derivatives	Branched_chain_amino_acid_degradation_regulons	Acetoacetyl_CoA_synthetase_(EC_6.2.1.16)	3.5587	3.7333	0.00954308	0.0740654
k119_369893	Rubrobacter	Amino_Acids_and_Derivatives	Branched_chain_amino_acid_degradation_regulons	Branched_chain_alpha_keto_acid_dehydrogenase_E1_component_alpha_subunit_(EC_1.2.4.4)	4.53775	5.25645	0.000322164	0.0132867
k119_291095	Rubrobacter	Amino_Acids_and_Derivatives	Branched_chain_amino_acid_degradation_regulons	Branched_chain_alpha_keto_acid_dehydrogenase_E1_component_alpha_subunit_(EC_1.2.4.4)	3.16667	4.0641	0.00794405	0.0676025
k119_574107	Acidobacteria	Amino_Acids_and_Derivatives	Branched_chain_amino_acid_degradation_regulons	Electron_transfer_flavoprotein_beta_subunit	5.06699	4.71639	0.00898819	0.0717645
k119_74072	Rubrobacter	Amino_Acids_and_Derivatives	Branched_chain_amino_acid_degradation_regulons	Leucine_dehydrogenase_(EC_1.4.1.9)	6.39797	5.13179	3.70401e-05	0.00350005
k119_292555	Bacteria	Amino_Acids_and_Derivatives	Branched_chain_amino_acid_degradation_regulons	Methylcrotonyl_CoA_carboxylase_carboxyl_transferase_subunit_(EC_6.4.1.4)	2.15379	4.46204	0.00630095	0.0598151
k119_357268	Bacteria	Amino_Acids_and_Derivatives	Branched_chain_amino_acid_degradation_regulons	Succinyl_CoA:3_ketoacid_coenzyme_A_transferase_subunit_B_(EC_2.8.3.5)	3.22859	3.65614	0.00812126	0.0683733
k119_12778	Actinobacteria	Amino_Acids_and_Derivatives	Branched_chain_amino_acid_metabolism_in_plants	Dihydrolipoamide_dehydrogenase_of_branched_chain_alpha_keto_acid_dehydrogenase_(EC_1.8.1.4)	2.13399	4.12197	0.0158958	0.0971816
k119_184246	Rubrobacter xylanophilus DSM 9941	Amino_Acids_and_Derivatives	Chorismate_biosynthesis_in_plants	5_Enolpyruvylshikimate_3_phosphate_synthase_(EC_2.5.1.19)	6.24578	5.95337	0.00043345	0.0155633
k119_362101	Rubrobacter	Amino_Acids_and_Derivatives	Chorismate_biosynthesis_in_plants	Chorismate_synthase_(EC_4.2.3.5)	4.29885	3.02501	0.0145842	0.0926473
k119_156338	Rubrobacter aplysinae	Amino_Acids_and_Derivatives	Chorismate_biosynthesis_in_Streptococci	2_keto_3_deoxy_D_arabino_heptulosonate_7_phosphate_synthase_I_beta_(EC_2.5.1.54)	7.17985	3.10267	0.00832605	0.069034
k119_268347	Rubrobacter aplysinae	Amino_Acids_and_Derivatives	Chorismate_biosynthesis_in_Streptococci	2_keto_3_deoxy_D_arabino_heptulosonate_7_phosphate_synthase_I_beta_(EC_2.5.1.54)	14.033	2.61479	0.00404381	0.0479294
k119_372221	Rubrobacter	Amino_Acids_and_Derivatives	Chorismate_biosynthesis_in_Streptococci	Chorismate_mutase_I_(EC_5.4.99.5)	4.25189	5.7844	0.000173141	0.00932304
k119_374534	Rubrobacter	Amino_Acids_and_Derivatives	Chorismate_biosynthesis_in_Streptococci	Chorismate_mutase_I_(EC_5.4.99.5)	4.05649	4.75647	0.00231638	0.0365975
k119_34030	Rubrobacter	Amino_Acids_and_Derivatives	Chorismate_biosynthesis_in_Streptococci	Chorismate_mutase_I_(EC_5.4.99.5)	3.45309	3.63618	0.0102466	0.0768065
k119_451699	Rubrobacter	Amino_Acids_and_Derivatives	Chorismate_biosynthesis_in_Streptococci	Chorismate_mutase_I_(EC_5.4.99.5)	4.08712	3.31012	0.0115763	0.08187
k119_162658	Bacteria	Amino_Acids_and_Derivatives	Chorismate_biosynthesis_in_Streptococci	Prephenate_dehydratase_(EC_4.2.1.51)	3.05078	5.00821	0.00915276	0.0724825
k119_77915	Rubrobacter	Amino_Acids_and_Derivatives	Chorismate_biosynthesis_in_Streptococci	Prephenate_dehydratase_(EC_4.2.1.51)	6.64962	4.75439	0.000219877	0.0107703
k119_421199	Rubrobacter	Amino_Acids_and_Derivatives	Chorismate_biosynthesis_in_Streptococci	Prephenate_dehydratase_(EC_4.2.1.51)	6.00665	3.70386	0.00332769	0.0435137
k119_255547	Firmicutes	Amino_Acids_and_Derivatives	Cinnamic_Acid_Degradation	Acetaldehyde_dehydrogenase_(EC_1.2.1.10)	4.32743	5.15816	0.00150979	0.029498
k119_501610	Terrabacteria group	Amino_Acids_and_Derivatives	Creatine_and_Creatinine_Degradation	Creatinine_amidohydrolase_(EC_3.5.2.10)	3.97835	5.55962	0.00212885	0.0350355
k119_504739	Rubrobacter xylanophilus	Amino_Acids_and_Derivatives	Creatine_and_Creatinine_Degradation	N_methylhydantoinase_A_(EC_3.5.2.14)	3.4283	5.13552	0.00152803	0.0296046
k119_475344	Rubrobacter	Amino_Acids_and_Derivatives	Creatine_and_Creatinine_Degradation	N_methylhydantoinase_A_(EC_3.5.2.14)	3.84847	4.0771	0.00815251	0.0685095
k119_324776	Terrabacteria group	Amino_Acids_and_Derivatives	Creatine_and_Creatinine_Degradation	N_methylhydantoinase_A_(EC_3.5.2.14)	4.26863	3.44451	0.0104918	0.0776598
k119_12798	Rubrobacter xylanophilus	Amino_Acids_and_Derivatives	Creatine_and_Creatinine_Degradation	N_methylhydantoinase_A_(EC_3.5.2.14)	5.27676	3.13744	0.0152025	0.0947995
k119_504739	Rubrobacter xylanophilus	Amino_Acids_and_Derivatives	Creatine_and_Creatinine_Degradation	N_methylhydantoinase_B_(EC_3.5.2.14)	3.4283	5.13552	0.00152803	0.0296046
k119_342133	Terrabacteria group	Amino_Acids_and_Derivatives	Creatine_and_Creatinine_Degradation	N_methylhydantoinase_B_(EC_3.5.2.14)	3.19679	3.84408	0.0160284	0.0975779
k119_12798	Rubrobacter xylanophilus	Amino_Acids_and_Derivatives	Creatine_and_Creatinine_Degradation	N_methylhydantoinase_B_(EC_3.5.2.14)	5.27676	3.13744	0.0152025	0.0947995
k119_331328	Rubrobacter radiotolerans	Amino_Acids_and_Derivatives	Cysteine_Biosynthesis	Adenylylsulfate_kinase_(EC_2.7.1.25)	2.76953	4.80946	0.00149803	0.0293834
k119_151270	Rubrobacter	Amino_Acids_and_Derivatives	Cysteine_Biosynthesis	Adenylylsulfate_kinase_(EC_2.7.1.25)	3.01117	4.35106	0.00673702	0.0621395
k119_151845	Rubrobacter	Amino_Acids_and_Derivatives	Cysteine_Biosynthesis	Adenylylsulfate_kinase_(EC_2.7.1.25)	4.92558	3.89356	0.00756556	0.0659355
k119_512214	Rubrobacter xylanophilus	Amino_Acids_and_Derivatives	Cysteine_Biosynthesis	Adenylylsulfate_kinase_(EC_2.7.1.25)	4.36041	3.52841	0.00588518	0.0577836
k119_381298	Rubrobacter xylanophilus	Amino_Acids_and_Derivatives	Cysteine_Biosynthesis	Adenylylsulfate_kinase_(EC_2.7.1.25)	4.68049	3.46042	0.00831702	0.0689994
k119_579274	Rubrobacter	Amino_Acids_and_Derivatives	Cysteine_Biosynthesis	Cys_regulon_transcriptional_activator_CysB	3.48013	5.00211	0.0120703	0.0836466
k119_138601	Rubrobacter xylanophilus	Amino_Acids_and_Derivatives	Cysteine_Biosynthesis	Cys_regulon_transcriptional_activator_CysB	3.34634	4.55079	0.00646023	0.0606803
k119_206516	Rubrobacter	Amino_Acids_and_Derivatives	Cysteine_Biosynthesis	Cys_regulon_transcriptional_activator_CysB	9.35341	4.22672	0.000539134	0.0173717
k119_483661	Terrabacteria group	Amino_Acids_and_Derivatives	Cysteine_Biosynthesis	Cystathionine_beta_synthase_(EC_4.2.1.22)	2.59875	4.88359	0.00527947	0.0546617
k119_17526	Terrabacteria group	Amino_Acids_and_Derivatives	Cysteine_Biosynthesis	Cystathionine_beta_synthase_(EC_4.2.1.22)	5.98092	3.6521	0.00110123	0.0252167
k119_483661	Terrabacteria group	Amino_Acids_and_Derivatives	Cysteine_Biosynthesis	Cystathionine_gamma_lyase_(EC_4.4.1.1)	2.59875	4.88359	0.00527947	0.0546617
k119_546430	Sphaerobacteraceae	Amino_Acids_and_Derivatives	Cysteine_Biosynthesis	Cystathionine_gamma_lyase_(EC_4.4.1.1)	3.96744	3.86693	0.00681556	0.0624307
k119_526767	Rubrobacter	Amino_Acids_and_Derivatives	Cysteine_Biosynthesis	Cysteine_synthase_(EC_2.5.1.47)	5.80174	5.90311	0.000356378	0.0139628
k119_3005	Bacteria	Amino_Acids_and_Derivatives	Cysteine_Biosynthesis	Cysteine_synthase_(EC_2.5.1.47)	8.312	5.78518	8.58461e-05	0.00606455
k119_35802	Rubrobacter	Amino_Acids_and_Derivatives	Cysteine_Biosynthesis	Cysteine_synthase_(EC_2.5.1.47)	2.98168	3.9329	0.0120128	0.0834826
k119_107191	Rubrobacter	Amino_Acids_and_Derivatives	Cysteine_Biosynthesis	Cysteine_synthase_A_(EC_2.5.1.47)	2.35231	4.09723	0.0131804	0.0877426
k119_545393	Rubrobacter	Amino_Acids_and_Derivatives	Cysteine_Biosynthesis	Phosphoadenylyl_sulfate_reductase_[thioredoxin]_(EC_1.8.4.8)	2.56456	4.02881	0.00925189	0.0728835
k119_314201	Terrabacteria group	Amino_Acids_and_Derivatives	Cysteine_Biosynthesis	Phosphoadenylyl_sulfate_reductase_[thioredoxin]_(EC_1.8.4.8)	3.01063	3.54726	0.0154538	0.0956517
k119_585220	Actinobacteria	Amino_Acids_and_Derivatives	Cysteine_Biosynthesis	Sulfate_adenylyltransferase_subunit_2_(EC_2.7.7.4)	2.18122	4.70443	0.00311584	0.0420763
k119_71422	Actinobacteria	Amino_Acids_and_Derivatives	Cysteine_Biosynthesis	Sulfate_adenylyltransferase_subunit_2_(EC_2.7.7.4)	2.19891	4.27948	0.00902021	0.0719622
k119_50307	Actinobacteria <phylum>	Amino_Acids_and_Derivatives	Cysteine_Biosynthesis	Sulfate_transporter_CysZ_type	5.85506	6.62021	1.60677e-05	0.00199883
k119_513175	Rubrobacter	Amino_Acids_and_Derivatives	Cysteine_Biosynthesis	Sulfate_transporter_CysZ_type	3.56709	5.47438	0.000658569	0.019365
k119_401242	Rubrobacter	Amino_Acids_and_Derivatives	Cysteine_Biosynthesis	Sulfate_transporter_CysZ_type	3.68021	4.42061	0.00379782	0.0463278
k119_482729	Bacteria	Amino_Acids_and_Derivatives	Glutamate_dehydrogenases	NAD_specific_glutamate_dehydrogenase_(EC_1.4.1.2)_large_form	3.68053	5.60897	0.000255103	0.0116216
k119_516928	Rubrobacter	Amino_Acids_and_Derivatives	Glutamate_dehydrogenases	NAD_specific_glutamate_dehydrogenase_(EC_1.4.1.2)_large_form	2.45539	4.87911	0.00456705	0.0508501
k119_447753	Bacteria	Amino_Acids_and_Derivatives	Glutamate_dehydrogenases	NAD_specific_glutamate_dehydrogenase_(EC_1.4.1.2)_large_form	2.56759	4.82149	0.00215574	0.0352036
k119_552031	Bacteria	Amino_Acids_and_Derivatives	Glutamate_dehydrogenases	NAD_specific_glutamate_dehydrogenase_(EC_1.4.1.2)_large_form	2.41296	4.72396	0.0101583	0.0764322
k119_16561	Rubrobacter xylanophilus DSM 9941	Amino_Acids_and_Derivatives	Glutamate_dehydrogenases	NAD_specific_glutamate_dehydrogenase_(EC_1.4.1.2)_large_form	2.89994	4.67552	0.00429141	0.0492789
k119_329756	Bacteria	Amino_Acids_and_Derivatives	Glutamate_dehydrogenases	NAD_specific_glutamate_dehydrogenase_(EC_1.4.1.2)_large_form	2.35928	4.5429	0.00412936	0.0483958
k119_388030	Rubrobacter	Amino_Acids_and_Derivatives	Glutamate_dehydrogenases	NAD_specific_glutamate_dehydrogenase_(EC_1.4.1.2)_large_form	4.44909	4.44304	0.00531161	0.0548486
k119_375351	Rubrobacter aplysinae	Amino_Acids_and_Derivatives	Glutamate_dehydrogenases	NAD_specific_glutamate_dehydrogenase_(EC_1.4.1.2)_large_form	3.44019	4.28003	0.00478155	0.0520407
k119_185865	Rubrobacter	Amino_Acids_and_Derivatives	Glutamate_dehydrogenases	NAD_specific_glutamate_dehydrogenase_(EC_1.4.1.2)_large_form	3.49389	3.78769	0.00495771	0.0529379
k119_402560	Actinobacteria <phylum>	Amino_Acids_and_Derivatives	Glutamate_dehydrogenases	NAD_specific_glutamate_dehydrogenase_(EC_1.4.1.2)_large_form	2.59988	3.51672	0.0112729	0.080707
k119_375944	Nocardioides	Amino_Acids_and_Derivatives	Glutamine_Glutamate_Aspartate_and_Asparagine_Biosynthesis	Ferredoxin_dependent_glutamate_synthase_(EC_1.4.7.1)	2.41582	4.30992	0.00601607	0.0584702
k119_450158	Rubrobacter	Amino_Acids_and_Derivatives	Glutamine_Glutamate_Aspartate_and_Asparagine_Biosynthesis	Glutamate_synthase_[NADPH]_large_chain_(EC_1.4.1.13)	2.39652	5.13532	0.00146669	0.0291264
k119_542307	Rubrobacter	Amino_Acids_and_Derivatives	Glutamine_Glutamate_Aspartate_and_Asparagine_Biosynthesis	Glutamate_synthase_[NADPH]_large_chain_(EC_1.4.1.13)	2.24316	5.00355	0.000934774	0.0233327
k119_493128	Rubrobacter	Amino_Acids_and_Derivatives	Glutamine_Glutamate_Aspartate_and_Asparagine_Biosynthesis	Glutamate_synthase_[NADPH]_large_chain_(EC_1.4.1.13)	2.76179	4.94272	0.000943144	0.0234419
k119_64766	Rubrobacter	Amino_Acids_and_Derivatives	Glutamine_Glutamate_Aspartate_and_Asparagine_Biosynthesis	Glutamate_synthase_[NADPH]_large_chain_(EC_1.4.1.13)	2.53917	4.70794	0.00875482	0.0709974
k119_192986	Rubrobacter	Amino_Acids_and_Derivatives	Glutamine_Glutamate_Aspartate_and_Asparagine_Biosynthesis	Glutamate_synthase_[NADPH]_large_chain_(EC_1.4.1.13)	3.73821	4.67338	0.00195761	0.0335378
k119_374004	Bacteria	Amino_Acids_and_Derivatives	Glutamine_Glutamate_Aspartate_and_Asparagine_Biosynthesis	Glutamate_synthase_[NADPH]_large_chain_(EC_1.4.1.13)	4.68711	4.0891	0.00532648	0.0549483
k119_287299	Rubrobacter	Amino_Acids_and_Derivatives	Glutamine_Glutamate_Aspartate_and_Asparagine_Biosynthesis	Glutamate_synthase_[NADPH]_large_chain_(EC_1.4.1.13)	3.8755	3.76382	0.00670857	0.0619731
k119_179913	Bacteria	Amino_Acids_and_Derivatives	Glutamine_Glutamate_Aspartate_and_Asparagine_Biosynthesis	Glutamate_synthase_[NADPH]_large_chain_(EC_1.4.1.13)	6.00903	3.67292	0.0020307	0.0342881
k119_235130	Rubrobacter	Amino_Acids_and_Derivatives	Glutamine_Glutamate_Aspartate_and_Asparagine_Biosynthesis	Glutamate_synthase_[NADPH]_large_chain_(EC_1.4.1.13)	3.01389	3.66394	0.00957546	0.0741541
k119_107321	Rubrobacter	Amino_Acids_and_Derivatives	Glutamine_Glutamate_Aspartate_and_Asparagine_Biosynthesis	Glutamate_synthase_[NADPH]_large_chain_(EC_1.4.1.13)	3.78118	3.65902	0.00808737	0.0681876
k119_328966	Rubrobacter xylanophilus	Amino_Acids_and_Derivatives	Glutamine_Glutamate_Aspartate_and_Asparagine_Biosynthesis	Glutamate_synthase_[NADPH]_large_chain_(EC_1.4.1.13)	3.88231	3.17706	0.0139789	0.0906817
k119_490271	Rubrobacter	Amino_Acids_and_Derivatives	Glutamine_Glutamate_Aspartate_and_Asparagine_Biosynthesis	Glutamate_synthase_[NADPH]_small_chain_(EC_1.4.1.13)	7.62969	4.806	5.29944e-05	0.00445055
k119_21861	Rubrobacter	Amino_Acids_and_Derivatives	Glutamine_Glutamate_Aspartate_and_Asparagine_Biosynthesis	Glutamate_synthase_[NADPH]_small_chain_(EC_1.4.1.13)	4.55937	4.33511	0.00149813	0.0293834
k119_453685	Actinobacteria	Amino_Acids_and_Derivatives	Glutamine_Glutamate_Aspartate_and_Asparagine_Biosynthesis	Glutamate_synthase_[NADPH]_small_chain_(EC_1.4.1.13)	3.00938	4.16444	0.00609895	0.0588822
k119_492534	Bacteria	Amino_Acids_and_Derivatives	Glutamine_Glutamate_Aspartate_and_Asparagine_Biosynthesis	Glutamine_synthetase_family_protein_in_hypothetical_Actinobacterial_gene_cluster	2.55598	5.15373	0.00156889	0.0299563
k119_64610	Thaumarchaeota	Amino_Acids_and_Derivatives	Glutamine_glutamate_aspartate_asparagine_metabolism_in_plants	Aconitate_hydratase_(EC_4.2.1.3)	4.3861	5.50163	0.000149271	0.00856444
k119_279276	Rubrobacter	Amino_Acids_and_Derivatives	Glutamine_glutamate_aspartate_asparagine_metabolism_in_plants	Aconitate_hydratase_(EC_4.2.1.3)	2.83378	5.28915	0.00131572	0.0274137
k119_36038	Rubrobacter	Amino_Acids_and_Derivatives	Glutamine_glutamate_aspartate_asparagine_metabolism_in_plants	Aconitate_hydratase_(EC_4.2.1.3)	3.12587	4.41702	0.00777546	0.0668248
k119_105322	Rubrobacter	Amino_Acids_and_Derivatives	Glutamine_glutamate_aspartate_asparagine_metabolism_in_plants	Aconitate_hydratase_(EC_4.2.1.3)	2.94897	4.25917	0.00406655	0.0480559
k119_440898	Actinobacteria	Amino_Acids_and_Derivatives	Glutamine_glutamate_aspartate_asparagine_metabolism_in_plants	Aconitate_hydratase_(EC_4.2.1.3)	2.98104	4.18594	0.00948544	0.0738119
k119_130834	Rubrobacter	Amino_Acids_and_Derivatives	Glutamine_glutamate_aspartate_asparagine_metabolism_in_plants	Aconitate_hydratase_(EC_4.2.1.3)	5.60716	3.63583	0.00195183	0.0335013
k119_72050	Rubrobacter	Amino_Acids_and_Derivatives	Glutamine_glutamate_aspartate_asparagine_metabolism_in_plants	Aconitate_hydratase_(EC_4.2.1.3)	4.5583	3.16517	0.0109436	0.0791803
k119_201626	Nocardioidaceae	Amino_Acids_and_Derivatives	Glutamine_glutamate_aspartate_asparagine_metabolism_in_plants	Citrate_synthase_(si)_(EC_2.3.3.1)	2.44293	4.90522	0.0065451	0.0611468
k119_348193	Thaumarchaeota	Amino_Acids_and_Derivatives	Glutamine_glutamate_aspartate_asparagine_metabolism_in_plants	Citrate_synthase_(si)_(EC_2.3.3.1)	6.49564	4.73585	0.00120747	0.0263201
k119_485735	Rubrobacter	Amino_Acids_and_Derivatives	Glutamine_glutamate_aspartate_asparagine_metabolism_in_plants	Citrate_synthase_(si)_(EC_2.3.3.1)	2.54413	4.537	0.00437171	0.0497219
k119_563521	Bacteria	Amino_Acids_and_Derivatives	Glutamine_glutamate_aspartate_asparagine_metabolism_in_plants	Citrate_synthase_(si)_(EC_2.3.3.1)	4.04556	4.45225	0.00141649	0.0285797
k119_446593	Actinobacteria <phylum>	Amino_Acids_and_Derivatives	Glutamine_glutamate_aspartate_asparagine_metabolism_in_plants	Citrate_synthase_(si)_(EC_2.3.3.1)	3.14637	4.42956	0.00353722	0.0448147
k119_174424	Rubrobacter	Amino_Acids_and_Derivatives	Glutamine_glutamate_aspartate_asparagine_metabolism_in_plants	Citrate_synthase_(si)_(EC_2.3.3.1)	5.7263	4.25213	0.000484298	0.0164234
k119_565733	Rubrobacter	Amino_Acids_and_Derivatives	Glutamine_glutamate_aspartate_asparagine_metabolism_in_plants	Citrate_synthase_(si)_(EC_2.3.3.1)	4.27316	4.24779	0.00159857	0.0302467
k119_291219	Rubrobacter	Amino_Acids_and_Derivatives	Glutamine_glutamate_aspartate_asparagine_metabolism_in_plants	Citrate_synthase_(si)_(EC_2.3.3.1)	3.10627	4.22959	0.00843171	0.0695216
k119_282398	Actinobacteria <phylum>	Amino_Acids_and_Derivatives	Glutamine_glutamate_aspartate_asparagine_metabolism_in_plants	Citrate_synthase_(si)_(EC_2.3.3.1)	2.81361	3.69939	0.0129455	0.0868854
k119_224456	Propionibacteriales	Amino_Acids_and_Derivatives	Glutamine_glutamate_aspartate_asparagine_metabolism_in_plants	Citrate_synthase_(si)_(EC_2.3.3.1)	7.18804	3.69939	0.0131057	0.0875246
k119_347898	Rubrobacter	Amino_Acids_and_Derivatives	Glutamine_glutamate_aspartate_asparagine_metabolism_in_plants	Isocitrate_dehydrogenase_[NAD]_(EC_1.1.1.41)	3.0017	5.10493	0.000797011	0.0215414
k119_18428	Rubrobacter	Amino_Acids_and_Derivatives	Glutamine_glutamate_aspartate_asparagine_metabolism_in_plants	Isocitrate_dehydrogenase_[NAD]_(EC_1.1.1.41)	2.10496	4.75136	0.00640265	0.0603466
k119_328703	Nitrososphaera	Amino_Acids_and_Derivatives	Glutamine_glutamate_aspartate_asparagine_metabolism_in_plants	Isocitrate_dehydrogenase_[NAD]_(EC_1.1.1.41)	2.13849	4.67313	0.00767598	0.0664115
k119_574378	Rubrobacter	Amino_Acids_and_Derivatives	Glutamine_glutamate_aspartate_asparagine_metabolism_in_plants	Isocitrate_dehydrogenase_[NAD]_(EC_1.1.1.41)	2.14321	4.66813	0.00601777	0.0584708
k119_188875	Rubrobacter	Amino_Acids_and_Derivatives	Glutamine_glutamate_aspartate_asparagine_metabolism_in_plants	Isocitrate_dehydrogenase_[NAD]_(EC_1.1.1.41)	4.19142	4.3512	0.00186231	0.0326641
k119_351246	Rubrobacter	Amino_Acids_and_Derivatives	Glutamine_glutamate_aspartate_asparagine_metabolism_in_plants	Isocitrate_dehydrogenase_[NAD]_(EC_1.1.1.41)	4.56078	4.2752	0.00405921	0.0480194
k119_88950	Rubrobacter xylanophilus	Amino_Acids_and_Derivatives	Glutamine_glutamate_aspartate_asparagine_metabolism_in_plants	Isocitrate_dehydrogenase_[NAD]_(EC_1.1.1.41)	3.01169	3.86952	0.00594405	0.058092
k119_486875	Terrabacteria group	Amino_Acids_and_Derivatives	Glutamine_glutamate_aspartate_asparagine_metabolism_in_plants	Isocitrate_dehydrogenase_[NAD]_(EC_1.1.1.41)	5.09191	3.77276	0.00082002	0.0218437
k119_417839	Rubrobacter	Amino_Acids_and_Derivatives	Glutamine_glutamate_aspartate_asparagine_metabolism_in_plants	Isocitrate_dehydrogenase_[NAD]_(EC_1.1.1.41)	5.94296	3.16541	0.00432028	0.0494123
k119_46195	Actinobacteria	Amino_Acids_and_Derivatives	Glutamine_glutamate_aspartate_asparagine_metabolism_in_plants	Isocitrate_dehydrogenase_[NADP]_(EC_1.1.1.42)	3.01609	4.53322	0.00732411	0.0648386
k119_542109	Actinobacteria	Amino_Acids_and_Derivatives	Glutamine_glutamate_aspartate_asparagine_metabolism_in_plants	Isocitrate_dehydrogenase_[NADP]_(EC_1.1.1.42)	3.05458	4.31591	0.00779984	0.0669798
k119_332045	Actinobacteria	Amino_Acids_and_Derivatives	Glutamine_glutamate_aspartate_asparagine_metabolism_in_plants	Isocitrate_dehydrogenase_[NADP]_(EC_1.1.1.42)	6.11794	3.91712	0.00321455	0.0427129
k119_347462	Terrabacteria group	Amino_Acids_and_Derivatives	Glutamine_glutamate_aspartate_asparagine_metabolism_in_plants	Phosphoenolpyruvate_carboxylase_(EC_4.1.1.31)	3.50239	5.64052	0.000987527	0.0240193
k119_92338	Fimbriimonas ginsengisoli	Amino_Acids_and_Derivatives	Glutamine_glutamate_aspartate_asparagine_metabolism_in_plants	Phosphoenolpyruvate_carboxylase_(EC_4.1.1.31)	2.20376	4.93771	0.00748168	0.0655193
k119_22051	Actinobacteria <phylum>	Amino_Acids_and_Derivatives	Glutamine_glutamate_aspartate_asparagine_metabolism_in_plants	Pyruvatephosphate_dikinase_(EC_2.7.9.1)	6.0892	6.03908	0.000625135	0.0189009
k119_103808	Thaumarchaeota	Amino_Acids_and_Derivatives	Glutamine_glutamate_aspartate_asparagine_metabolism_in_plants	Pyruvatephosphate_dikinase_(EC_2.7.9.1)	3.31168	5.13846	0.00206811	0.0345358
k119_329310	Nitrososphaera	Amino_Acids_and_Derivatives	Glutamine_glutamate_aspartate_asparagine_metabolism_in_plants	Pyruvatephosphate_dikinase_(EC_2.7.9.1)	3.10242	5.12799	0.0020615	0.034487
k119_298790	Bacteria	Amino_Acids_and_Derivatives	Glutamine_glutamate_aspartate_asparagine_metabolism_in_plants	Pyruvatephosphate_dikinase_(EC_2.7.9.1)	2.15226	4.76442	0.00431808	0.0494008
k119_516281	Actinobacteria	Amino_Acids_and_Derivatives	Glutamine_glutamate_aspartate_asparagine_metabolism_in_plants	Pyruvatephosphate_dikinase_(EC_2.7.9.1)	2.447	4.48065	0.0141522	0.091266
k119_555339	Rubrobacter	Amino_Acids_and_Derivatives	Glutamine_synthetases	Glutamine_synthetase_type_I_(EC_6.3.1.2)	2.75386	5.08397	0.00181512	0.0322574
k119_213137	Bacteria	Amino_Acids_and_Derivatives	Glutamine_synthetases	Glutamine_synthetase_type_I_(EC_6.3.1.2)	2.42218	4.77436	0.0072829	0.0646492
k119_95662	Thaumarchaeota	Amino_Acids_and_Derivatives	Glutamine_synthetases	Glutamine_synthetase_type_I_(EC_6.3.1.2)	2.67142	4.6733	0.0140656	0.0909809
k119_580414	Rubrobacter	Amino_Acids_and_Derivatives	Glutamine_synthetases	Glutamine_synthetase_type_I_(EC_6.3.1.2)	4.07023	4.28825	0.00417037	0.0486679
k119_377404	Bacteria	Amino_Acids_and_Derivatives	Glutamine_synthetases	Glutamine_synthetase_type_I_(EC_6.3.1.2)	2.1694	4.28412	0.0156636	0.0963096
k119_113778	Rubrobacter	Amino_Acids_and_Derivatives	Glutamine_synthetases	Glutamine_synthetase_type_I_(EC_6.3.1.2)	3.64557	4.04822	0.0108627	0.0789243
k119_90818	Actinobacteria	Amino_Acids_and_Derivatives	Glutamine_synthetases	Glutamine_synthetase_type_I_(EC_6.3.1.2)	4.28001	3.10627	0.00917944	0.0726128
k119_54761	Bacteria	Amino_Acids_and_Derivatives	Glutamine_synthetases	Glutamine_synthetase_type_III_GlnN_(EC_6.3.1.2)	4.76756	4.35103	0.00453891	0.0506762
k119_526767	Rubrobacter	Amino_Acids_and_Derivatives	Glycine_and_Serine_Utilization	Aminomethyltransferase_(glycine_cleavage_system_T_protein)_(EC_2.1.2.10)	5.80174	5.90311	0.000356378	0.0139628
k119_156161	Rubrobacter	Amino_Acids_and_Derivatives	Glycine_and_Serine_Utilization	Aminomethyltransferase_(glycine_cleavage_system_T_protein)_(EC_2.1.2.10)	3.32507	5.19377	0.00101074	0.0242334
k119_551495	Rubrobacter	Amino_Acids_and_Derivatives	Glycine_and_Serine_Utilization	Aminomethyltransferase_(glycine_cleavage_system_T_protein)_(EC_2.1.2.10)	3.12843	5.10182	0.00248499	0.0376253
k119_330732	Rubrobacter	Amino_Acids_and_Derivatives	Glycine_and_Serine_Utilization	Aminomethyltransferase_(glycine_cleavage_system_T_protein)_(EC_2.1.2.10)	7.14246	4.82717	0.000120428	0.00744678
k119_148661	Rubrobacter xylanophilus	Amino_Acids_and_Derivatives	Glycine_and_Serine_Utilization	Aminomethyltransferase_(glycine_cleavage_system_T_protein)_(EC_2.1.2.10)	3.91302	4.29296	0.0108952	0.0790146
k119_513264	Actinobacteria <phylum>	Amino_Acids_and_Derivatives	Glycine_and_Serine_Utilization	Aminomethyltransferase_(glycine_cleavage_system_T_protein)_(EC_2.1.2.10)	2.49338	4.09698	0.0118775	0.0829867
k119_346714	Rubrobacter	Amino_Acids_and_Derivatives	Glycine_and_Serine_Utilization	Aminomethyltransferase_(glycine_cleavage_system_T_protein)_(EC_2.1.2.10)	3.17996	3.95076	0.00406183	0.0480194
k119_304623	Actinobacteria	Amino_Acids_and_Derivatives	Glycine_and_Serine_Utilization	Aminomethyltransferase_(glycine_cleavage_system_T_protein)_(EC_2.1.2.10)	5.82725	3.94165	0.00140828	0.0284793
k119_477048	Actinobacteria <phylum>	Amino_Acids_and_Derivatives	Glycine_and_Serine_Utilization	Aminomethyltransferase_(glycine_cleavage_system_T_protein)_(EC_2.1.2.10)	3.37914	3.87686	0.00595329	0.0581049
k119_502287	Rubrobacter xylanophilus	Amino_Acids_and_Derivatives	Glycine_and_Serine_Utilization	Aminomethyltransferase_(glycine_cleavage_system_T_protein)_(EC_2.1.2.10)	6.74204	3.47581	0.0105601	0.0778286
k119_20870	Bacteria	Amino_Acids_and_Derivatives	Glycine_and_Serine_Utilization	Aminomethyltransferase_(glycine_cleavage_system_T_protein)_(EC_2.1.2.10)	6.97403	3.45067	0.00517979	0.054226
k119_400095	Rubrobacter	Amino_Acids_and_Derivatives	Glycine_and_Serine_Utilization	Aminomethyltransferase_(glycine_cleavage_system_T_protein)_(EC_2.1.2.10)	5.58791	3.40671	0.00211605	0.0349081
k119_166735	Terrabacteria group	Amino_Acids_and_Derivatives	Glycine_and_Serine_Utilization	Aminomethyltransferase_(glycine_cleavage_system_T_protein)_(EC_2.1.2.10)	7.82085	2.94657	0.00806661	0.0681356
k119_261362	Rubrobacter aplysinae	Amino_Acids_and_Derivatives	Glycine_and_Serine_Utilization	Glycine_cleavage_system_H_protein	2.21844	4.7073	0.011347	0.0809382
k119_299191	Rubrobacter	Amino_Acids_and_Derivatives	Glycine_and_Serine_Utilization	Glycine_dehydrogenase_[decarboxylating]_(glycine_cleavage_system_P1_protein)_(EC_1.4.4.2)	4.02031	4.56357	0.00309201	0.0418934
k119_155700	Rubrobacter	Amino_Acids_and_Derivatives	Glycine_and_Serine_Utilization	Glycine_dehydrogenase_[decarboxylating]_(glycine_cleavage_system_P1_protein)_(EC_1.4.4.2)	2.64894	4.08045	0.0160158	0.0975485
k119_445351	Rubrobacter	Amino_Acids_and_Derivatives	Glycine_and_Serine_Utilization	Glycine_dehydrogenase_[decarboxylating]_(glycine_cleavage_system_P1_protein)_(EC_1.4.4.2)	3.23319	3.90457	0.013334	0.0883284
k119_574519	Rubrobacter	Amino_Acids_and_Derivatives	Glycine_and_Serine_Utilization	Glycine_dehydrogenase_[decarboxylating]_(glycine_cleavage_system_P1_protein)_(EC_1.4.4.2)	2.76403	3.77038	0.0119206	0.0831237
k119_222862	Rubrobacter xylanophilus	Amino_Acids_and_Derivatives	Glycine_and_Serine_Utilization	Glycine_dehydrogenase_[decarboxylating]_(glycine_cleavage_system_P1_protein)_(EC_1.4.4.2)	4.75993	3.39217	0.00687079	0.0626338
k119_424219	Rubrobacter	Amino_Acids_and_Derivatives	Glycine_and_Serine_Utilization	Glycine_dehydrogenase_[decarboxylating]_(glycine_cleavage_system_P1_protein)_(EC_1.4.4.2)	7.32078	3.18386	0.0108765	0.0789646
k119_100898	Rubrobacter	Amino_Acids_and_Derivatives	Glycine_and_Serine_Utilization	Glycine_dehydrogenase_[decarboxylating]_(glycine_cleavage_system_P1_protein)_(EC_1.4.4.2)	7.4973	3.02207	0.0125758	0.0855094
k119_147916	Nitrososphaera	Amino_Acids_and_Derivatives	Glycine_and_Serine_Utilization	Glycine_dehydrogenase_[decarboxylating]_(glycine_cleavage_system_P2_protein)_(EC_1.4.4.2)	3.45448	5.3577	0.00200282	0.0339831
k119_402422	Rubrobacter	Amino_Acids_and_Derivatives	Glycine_and_Serine_Utilization	Glycine_dehydrogenase_[decarboxylating]_(glycine_cleavage_system_P2_protein)_(EC_1.4.4.2)	2.34236	4.35983	0.00776573	0.0668111
k119_528668	Rubrobacter	Amino_Acids_and_Derivatives	Glycine_and_Serine_Utilization	Glycine_dehydrogenase_[decarboxylating]_(glycine_cleavage_system_P2_protein)_(EC_1.4.4.2)	3.0859	3.39508	0.0163735	0.0987435
k119_222862	Rubrobacter xylanophilus	Amino_Acids_and_Derivatives	Glycine_and_Serine_Utilization	Glycine_dehydrogenase_[decarboxylating]_(glycine_cleavage_system_P2_protein)_(EC_1.4.4.2)	4.75993	3.39217	0.00687079	0.0626338
k119_227833	Rubrobacter radiotolerans	Amino_Acids_and_Derivatives	Glycine_and_Serine_Utilization	Monoamine_oxidase_(1.4.3.4)	3.21798	4.12489	0.010211	0.0766492
k119_321567	Rubrobacter	Amino_Acids_and_Derivatives	Glycine_and_Serine_Utilization	Seryl_tRNA_synthetase_(EC_6.1.1.11)	3.51268	4.99117	0.00115903	0.025906
k119_332597	Rubrobacter aplysinae	Amino_Acids_and_Derivatives	Glycine_and_Serine_Utilization	Seryl_tRNA_synthetase_(EC_6.1.1.11)	5.06177	4.76501	0.000501362	0.0166619
k119_527438	Terrabacteria group	Amino_Acids_and_Derivatives	Glycine_Biosynthesis	L_threonine_3_dehydrogenase_(EC_1.1.1.103)	2.20358	4.38416	0.0108568	0.0789034
k119_410402	Rubrobacter radiotolerans	Amino_Acids_and_Derivatives	Glycine_cleavage_system	Dihydrolipoamide_dehydrogenase_(EC_1.8.1.4)	4.19368	5.69911	0.000415878	0.0152359
k119_392629	Actinobacteria	Amino_Acids_and_Derivatives	Glycine_cleavage_system	Dihydrolipoamide_dehydrogenase_(EC_1.8.1.4)	4.46493	5.13563	0.0069945	0.0632234
k119_245908	Terrabacteria group	Amino_Acids_and_Derivatives	Glycine_cleavage_system	Dihydrolipoamide_dehydrogenase_(EC_1.8.1.4)	6.16395	4.7053	0.00152578	0.0295777
k119_430998	Rubrobacter aplysinae	Amino_Acids_and_Derivatives	Glycine_cleavage_system	Dihydrolipoamide_dehydrogenase_(EC_1.8.1.4)	4.45613	4.55293	0.0016487	0.03075
k119_280837	Terrabacteria group	Amino_Acids_and_Derivatives	Glycine_cleavage_system	Dihydrolipoamide_dehydrogenase_(EC_1.8.1.4)	3.65896	4.19382	0.00379828	0.0463278
k119_505757	Rubrobacter aplysinae	Amino_Acids_and_Derivatives	Glycine_cleavage_system	Dihydrolipoamide_dehydrogenase_(EC_1.8.1.4)	2.32609	4.15154	0.0166686	0.0997899
k119_553876	Rubrobacter	Amino_Acids_and_Derivatives	Glycine_cleavage_system	Dihydrolipoamide_dehydrogenase_(EC_1.8.1.4)	2.16245	4.06144	0.010048	0.0759844
k119_39452	Actinobacteria <phylum>	Amino_Acids_and_Derivatives	Histidine_Biosynthesis	Histidinol_dehydrogenase_(EC_1.1.1.23)	3.22216	5.00728	0.000596662	0.0184476
k119_523548	Rubrobacter	Amino_Acids_and_Derivatives	Histidine_Biosynthesis	Histidinol_dehydrogenase_(EC_1.1.1.23)	2.19209	4.70759	0.00638663	0.0603033
k119_112638	unclassified Actinobacteria	Amino_Acids_and_Derivatives	Histidine_Biosynthesis	Histidinol_dehydrogenase_(EC_1.1.1.23)	10.4598	2.77093	0.0100142	0.0758495
k119_490818	Rubrobacter	Amino_Acids_and_Derivatives	Histidine_Biosynthesis	Histidinol_phosphatase_(EC_3.1.3.15)	2.19065	5.01819	0.00520306	0.0543504
k119_122019	Rubrobacter	Amino_Acids_and_Derivatives	Histidine_Biosynthesis	Histidinol_phosphatase_(EC_3.1.3.15)	3.58543	4.88698	0.00344686	0.0442115
k119_551115	Rubrobacter	Amino_Acids_and_Derivatives	Histidine_Biosynthesis	Histidinol_phosphatase_(EC_3.1.3.15)	2.56237	4.65091	0.0154415	0.0956201
k119_1885	Rubrobacter	Amino_Acids_and_Derivatives	Histidine_Biosynthesis	Imidazole_glycerol_phosphate_synthase_amidotransferase_subunit_(EC_2.4.2._)	3.18325	5.03808	0.00432151	0.0494123
k119_286492	Rubrobacter	Amino_Acids_and_Derivatives	Histidine_Biosynthesis	Imidazole_glycerol_phosphate_synthase_amidotransferase_subunit_(EC_2.4.2._)	3.81572	4.10795	0.0022905	0.0363674
k119_490701	Rubrobacter	Amino_Acids_and_Derivatives	Histidine_Biosynthesis	Phosphoribosyl_AMP_cyclohydrolase_(EC_3.5.4.19)	3.3174	4.762	0.00768689	0.0664656
k119_23647	Rubrobacter	Amino_Acids_and_Derivatives	Histidine_Biosynthesis_in_plants	Adenylosuccinate_synthetase_(EC_6.3.4.4)	2.26529	4.845	0.00695541	0.0630732
k119_122412	Isosphaeraceae	Amino_Acids_and_Derivatives	Histidine_Biosynthesis_in_plants	Adenylosuccinate_synthetase_(EC_6.3.4.4)	2.7878	4.56445	0.00170023	0.0311754
k119_117884	Rubrobacter	Amino_Acids_and_Derivatives	Histidine_Biosynthesis_in_plants	Adenylosuccinate_synthetase_(EC_6.3.4.4)	4.0896	3.63548	0.00879408	0.0711363
k119_499541	Rubrobacter xylanophilus	Amino_Acids_and_Derivatives	Histidine_Degradation	Formiminoglutamic_iminohydrolase_(EC_3.5.3.13)	2.54672	4.65762	0.0100358	0.0759535
k119_589124	Rubrobacter xylanophilus	Amino_Acids_and_Derivatives	Histidine_Degradation	Imidazolonepropionase_(EC_3.5.2.7)	4.63525	3.49792	0.00940333	0.0734605
k119_485623	Thaumarchaeota	Amino_Acids_and_Derivatives	HMG_CoA	Hydroxymethylglutaryl_CoA_synthase_(EC_2.3.3.10)	2.91011	4.73978	0.00450935	0.0505329
k119_206038	Thaumarchaeota	Amino_Acids_and_Derivatives	HMG_CoA	Hydroxymethylglutaryl_CoA_synthase_(EC_2.3.3.10)	6.18596	4.67317	0.00224418	0.0359721
k119_248441	Rubrobacter	Amino_Acids_and_Derivatives	Isoleucine_degradation	3_hydroxyacyl_CoA_dehydrogenase_(EC_1.1.1.35)	3.26745	5.32576	0.000920364	0.023202
k119_535994	Thaumarchaeota	Amino_Acids_and_Derivatives	Isoleucine_degradation	3_hydroxyacyl_CoA_dehydrogenase_(EC_1.1.1.35)	2.30457	4.79303	0.0053735	0.0552031
k119_240443	Rubrobacter	Amino_Acids_and_Derivatives	Isoleucine_degradation	3_hydroxyacyl_CoA_dehydrogenase_(EC_1.1.1.35)	2.72056	4.71227	0.00205266	0.034437
k119_54222	Rubrobacter	Amino_Acids_and_Derivatives	Isoleucine_degradation	3_hydroxyacyl_CoA_dehydrogenase_(EC_1.1.1.35)	3.4195	3.98191	0.00362046	0.0453211
k119_390253	Rubrobacter	Amino_Acids_and_Derivatives	Isoleucine_degradation	3_ketoacyl_CoA_thiolase_(EC_2.3.1.16)	2.71272	4.70564	0.0025843	0.0384161
k119_13940	Rubrobacter	Amino_Acids_and_Derivatives	Isoleucine_degradation	3_ketoacyl_CoA_thiolase_(EC_2.3.1.16)	3.61224	4.63638	0.00183012	0.0324018
k119_286776	Rubrobacter	Amino_Acids_and_Derivatives	Isoleucine_degradation	3_ketoacyl_CoA_thiolase_(EC_2.3.1.16)	5.58473	4.42999	0.00371916	0.045792
k119_366185	Rubrobacter	Amino_Acids_and_Derivatives	Isoleucine_degradation	3_ketoacyl_CoA_thiolase_(EC_2.3.1.16)	2.97264	4.33612	0.00684071	0.0625603
k119_246092	Rubrobacter radiotolerans	Amino_Acids_and_Derivatives	Isoleucine_degradation	3_ketoacyl_CoA_thiolase_(EC_2.3.1.16)	5.32678	4.31186	0.00167823	0.0310091
k119_528131	Actinobacteria	Amino_Acids_and_Derivatives	Isoleucine_degradation	3_ketoacyl_CoA_thiolase_(EC_2.3.1.16)	2.46615	4.21	0.013409	0.0885922
k119_64255	Belnapia	Amino_Acids_and_Derivatives	Isoleucine_degradation	3_ketoacyl_CoA_thiolase_(EC_2.3.1.16)	2.68859	3.61602	0.0105317	0.0777526
k119_233086	Rubrobacter	Amino_Acids_and_Derivatives	Isoleucine_degradation	3_ketoacyl_CoA_thiolase_[isoleucine_degradation]_(EC_2.3.1.16)	2.78825	4.54547	0.0128454	0.08659
k119_149203	Actinobacteria	Amino_Acids_and_Derivatives	Isoleucine_degradation	Acyl_CoA_dehydrogenase_short_chain_specific_(EC_1.3.99.2)	2.32924	4.30795	0.00872883	0.0709273
k119_514200	Nitrososphaera	Amino_Acids_and_Derivatives	Ketoisovalerate_oxidoreductase	Acetyl_coenzyme_A_synthetase_(EC_6.2.1.1)	3.23863	5.32496	0.00120254	0.0262933
k119_184391	Rubrobacter	Amino_Acids_and_Derivatives	Ketoisovalerate_oxidoreductase	Acetyl_coenzyme_A_synthetase_(EC_6.2.1.1)	3.52591	4.92396	0.00452467	0.0506355
k119_134997	Rubrobacter	Amino_Acids_and_Derivatives	Ketoisovalerate_oxidoreductase	Acetyl_coenzyme_A_synthetase_(EC_6.2.1.1)	3.4227	4.76439	0.00131729	0.0274274
k119_403204	Rubrobacter	Amino_Acids_and_Derivatives	Ketoisovalerate_oxidoreductase	Acetyl_coenzyme_A_synthetase_(EC_6.2.1.1)	2.32397	4.5576	0.0073384	0.0649185
k119_93168	cellular organisms	Amino_Acids_and_Derivatives	Ketoisovalerate_oxidoreductase	Acetyl_coenzyme_A_synthetase_(EC_6.2.1.1)	5.93878	4.42141	0.00541939	0.0553734
k119_183045	cellular organisms	Amino_Acids_and_Derivatives	Ketoisovalerate_oxidoreductase	Acetyl_coenzyme_A_synthetase_(EC_6.2.1.1)	3.86145	4.03574	0.00441863	0.0500506
k119_110732	Rubrobacter	Amino_Acids_and_Derivatives	Ketoisovalerate_oxidoreductase	Acetyl_coenzyme_A_synthetase_(EC_6.2.1.1)	7.73173	4.00518	0.0016905	0.0311361
k119_486494	cellular organisms	Amino_Acids_and_Derivatives	Ketoisovalerate_oxidoreductase	Acetyl_coenzyme_A_synthetase_(EC_6.2.1.1)	11.2622	3.63006	0.00269572	0.039112
k119_456708	Nitrososphaera	Amino_Acids_and_Derivatives	Ketoisovalerate_oxidoreductase	Acetyl_coenzyme_A_synthetase_(EC_6.2.1.1)	7.62667	3.39762	0.010834	0.0788521
k119_381176	Rubrobacter	Amino_Acids_and_Derivatives	Ketoisovalerate_oxidoreductase	Acetyl_coenzyme_A_synthetase_(EC_6.2.1.1)	8.56491	2.88712	0.0139278	0.0904681
k119_154335	Rubrobacter	Amino_Acids_and_Derivatives	Lysine_and_threonine_metabolism_in_plants	Aspartokinase_(EC_2.7.2.4)	2.72259	5.30747	0.000482388	0.0163812
k119_586285	Archaea	Amino_Acids_and_Derivatives	Lysine_and_threonine_metabolism_in_plants	Aspartokinase_(EC_2.7.2.4)	2.37876	4.9124	0.0038567	0.0467041
k119_76650	Rubrobacter xylanophilus	Amino_Acids_and_Derivatives	Lysine_and_threonine_metabolism_in_plants	Diaminopimelate_decarboxylase_(EC_4.1.1.20)	2.5316	4.93924	0.00234031	0.0367223
k119_555789	Rubrobacter	Amino_Acids_and_Derivatives	Lysine_and_threonine_metabolism_in_plants	Diaminopimelate_decarboxylase_(EC_4.1.1.20)	2.56295	4.41452	0.00965088	0.0744337
k119_45221	Rubrobacter	Amino_Acids_and_Derivatives	Lysine_and_threonine_metabolism_in_plants	Diaminopimelate_decarboxylase_(EC_4.1.1.20)	7.44648	4.10636	0.000880303	0.0227047
k119_278347	Terrabacteria group	Amino_Acids_and_Derivatives	Lysine_and_threonine_metabolism_in_plants	Diaminopimelate_decarboxylase_(EC_4.1.1.20)	5.47827	3.64164	0.00256928	0.0382777
k119_204852	unclassified Actinobacteria	Amino_Acids_and_Derivatives	Lysine_and_threonine_metabolism_in_plants	Threonine_synthase_(EC_4.2.3.1)	2.57858	4.84613	0.0163382	0.0986271
k119_196861	Bacteria	Amino_Acids_and_Derivatives	Lysine_and_threonine_metabolism_in_plants	Threonine_synthase_(EC_4.2.3.1)	2.38633	4.78606	0.0119359	0.0831835
k119_401849	Thaumarchaeota	Amino_Acids_and_Derivatives	Lysine_and_threonine_metabolism_in_plants	Threonine_synthase_(EC_4.2.3.1)	3.72771	4.4193	0.00366099	0.0455575
k119_226399	Rubrobacter xylanophilus	Amino_Acids_and_Derivatives	Lysine_Biosynthesis_DAP_Pathway	N_acetyl_LL_diaminopimelate_deacetylase_(EC_3.5.1.47)	2.26913	4.42644	0.0100579	0.0760093
k119_501393	Actinobacteria	Amino_Acids_and_Derivatives	Lysine_degradation	L_beta_lysine_56_aminomutase_alpha_subunit_(EC_5.4.3.3)	2.16337	4.45251	0.00732242	0.0648386
k119_225477	Actinobacteria	Amino_Acids_and_Derivatives	Lysine_degradation	L_beta_lysine_56_aminomutase_alpha_subunit_(EC_5.4.3.3)	4.46618	3.82878	0.00326006	0.043047
k119_294727	Sphingomonas	Amino_Acids_and_Derivatives	Lysine_degradation	L_lysine_permease	4.40581	4.75597	0.00762305	0.0661691
k119_438577	Nocardioidaceae	Amino_Acids_and_Derivatives	Lysine_degradation	Lysine_23_aminomutase_(EC_5.4.3.2)	2.38875	4.08529	0.0162696	0.0983979
k119_401404	Rubrobacter	Amino_Acids_and_Derivatives	Lysine_fermentation	3_hydroxybutyryl_CoA_dehydratase_(EC_4.2.1.55)	3.91262	4.79616	0.0035844	0.0450872
k119_130980	Rubrobacter	Amino_Acids_and_Derivatives	Lysine_fermentation	Acetoacetyl_CoA_reductase_(EC_1.1.1.36)	4.42912	4.92219	0.00507853	0.0535856
k119_572023	Terrabacteria group	Amino_Acids_and_Derivatives	Lysine_fermentation	Acetoacetyl_CoA_reductase_(EC_1.1.1.36)	7.00143	4.75544	0.000385973	0.0146187
k119_217526	Rubrobacter	Amino_Acids_and_Derivatives	Lysine_fermentation	Acetoacetyl_CoA_reductase_(EC_1.1.1.36)	2.44872	4.73693	0.0034827	0.0444881
k119_14157	Rubrobacter	Amino_Acids_and_Derivatives	Lysine_fermentation	Acetoacetyl_CoA_reductase_(EC_1.1.1.36)	3.00156	4.71459	0.00260536	0.0385586
k119_352788	Rubrobacter	Amino_Acids_and_Derivatives	Lysine_fermentation	Acetoacetyl_CoA_reductase_(EC_1.1.1.36)	3.22695	4.39163	0.00418222	0.0487171
k119_9823	Rubrobacter	Amino_Acids_and_Derivatives	Lysine_fermentation	Acetoacetyl_CoA_reductase_(EC_1.1.1.36)	9.66686	4.28951	0.000151722	0.00863739
k119_357582	Rubrobacter	Amino_Acids_and_Derivatives	Lysine_fermentation	Acetoacetyl_CoA_reductase_(EC_1.1.1.36)	5.51809	4.03476	0.00165031	0.0307638
k119_67650	Rubrobacter	Amino_Acids_and_Derivatives	Lysine_fermentation	Acetoacetyl_CoA_reductase_(EC_1.1.1.36)	6.06983	3.2127	0.0059464	0.058099
k119_309255	Thaumarchaeota	Amino_Acids_and_Derivatives	MethanopterinAromatic	UPF0129_protein_MJ1474	3.42182	4.80296	0.0127322	0.0861986
k119_330042	Rubrobacter xylanophilus	Amino_Acids_and_Derivatives	Methionine_and_cysteine_metabolism_in_plants	5_methyltetrahydropteroyltriglutamate__homocysteine_methyltransferase_(EC_2.1.1.14)	3.46827	5.12656	0.0029069	0.0405129
k119_436484	Chloroflexi	Amino_Acids_and_Derivatives	Methionine_and_cysteine_metabolism_in_plants	5_methylthioribose_kinase_(EC_2.7.1.100)	5.84692	5.55982	0.00119501	0.0262403
k119_16381	Archaea	Amino_Acids_and_Derivatives	Methionine_and_cysteine_metabolism_in_plants	Adenosylhomocysteinase_(EC_3.3.1.1)	2.89791	4.92995	0.010446	0.077491
k119_149897	Chloroflexales	Amino_Acids_and_Derivatives	Methionine_and_cysteine_metabolism_in_plants	Adenosylhomocysteinase_(EC_3.3.1.1)	4.40894	4.44613	0.00474445	0.0518305
k119_70330	Actinobacteria <phylum>	Amino_Acids_and_Derivatives	Methionine_and_cysteine_metabolism_in_plants	Adenosylhomocysteinase_(EC_3.3.1.1)	4.09008	4.18635	0.0149073	0.0937576
k119_570279	Rubrobacter	Amino_Acids_and_Derivatives	Methionine_and_cysteine_metabolism_in_plants	Adenosylhomocysteinase_(EC_3.3.1.1)	4.05538	3.68635	0.00699788	0.0632368
k119_40368	Rubrobacter	Amino_Acids_and_Derivatives	Methionine_and_cysteine_metabolism_in_plants	Adenosylhomocysteinase_(EC_3.3.1.1)	3.29028	3.61388	0.015392	0.0954535
k119_567968	Actinobacteria <phylum>	Amino_Acids_and_Derivatives	Methionine_and_cysteine_metabolism_in_plants	Adenosylhomocysteinase_(EC_3.3.1.1)	13.3855	3.56308	0.00478865	0.0520807
k119_547614	cellular organisms	Amino_Acids_and_Derivatives	Methionine_and_cysteine_metabolism_in_plants	Methylthioribose_1_phosphate_isomerase_(EC_5.3.1.23)	3.80165	5.28044	0.00428697	0.0492478
k119_500701	Terrabacteria group	Amino_Acids_and_Derivatives	Methionine_and_cysteine_metabolism_in_plants	S_adenosylmethionine_synthetase_(EC_2.5.1.6)	2.1985	4.29555	0.0100783	0.0761064
k119_305889	Rubrobacter xylanophilus	Amino_Acids_and_Derivatives	Methionine_and_cysteine_metabolism_in_plants	S_adenosylmethionine_synthetase_(EC_2.5.1.6)	4.02554	4.226	0.00230894	0.036519
k119_340794	Bilateria	Amino_Acids_and_Derivatives	Methionine_and_cysteine_metabolism_in_plants	S_adenosylmethionine_synthetase_(EC_2.5.1.6)	2.1216	4.06479	0.012649	0.0858467
k119_7331	Thaumarchaeota	Amino_Acids_and_Derivatives	Methionine_Biosynthesis	5_methyltetrahydrofolate__homocysteine_methyltransferase_(EC_2.1.1.13)	2.95708	5.35722	0.0029418	0.0407463
k119_46561	Bacteria	Amino_Acids_and_Derivatives	Methionine_Biosynthesis	5_methyltetrahydrofolate__homocysteine_methyltransferase_(EC_2.1.1.13)	3.53426	4.93821	0.002436	0.0373921
k119_182813	Rubrobacter	Amino_Acids_and_Derivatives	Methionine_Biosynthesis	5_methyltetrahydrofolate__homocysteine_methyltransferase_(EC_2.1.1.13)	4.4263	4.61368	0.000435794	0.0155929
k119_587480	Rubrobacter	Amino_Acids_and_Derivatives	Methionine_Biosynthesis	5_methyltetrahydrofolate__homocysteine_methyltransferase_(EC_2.1.1.13)	2.10752	4.45117	0.0119455	0.0832111
k119_23684	Bacteria	Amino_Acids_and_Derivatives	Methionine_Biosynthesis	5_methyltetrahydrofolate__homocysteine_methyltransferase_(EC_2.1.1.13)	4.26521	4.13905	0.00387447	0.0467563
k119_152557	Pseudonocardiaceae	Amino_Acids_and_Derivatives	Methionine_Biosynthesis	Betaine__homocysteine_S_methyltransferase_(EC_2.1.1.5)	5.43208	4.51113	0.00291077	0.0405202
k119_495008	Bacteria	Amino_Acids_and_Derivatives	Methionine_Biosynthesis	Betaine__homocysteine_S_methyltransferase_(EC_2.1.1.5)	3.45149	4.27742	0.00297607	0.041038
k119_240585	Rubrobacter radiotolerans	Amino_Acids_and_Derivatives	Methionine_Biosynthesis	Homoserine_O_acetyltransferase_(EC_2.3.1.31)	3.75817	5.02552	0.000987177	0.0240193
k119_415386	Rubrobacter aplysinae	Amino_Acids_and_Derivatives	Methionine_Biosynthesis	Homoserine_O_acetyltransferase_(EC_2.3.1.31)	7.97625	3.95841	0.000163531	0.00902675
k119_577256	Rubrobacter xylanophilus	Amino_Acids_and_Derivatives	Methionine_Biosynthesis	Methionine_ABC_transporter_ATP_binding_protein	2.70405	4.86661	0.00205474	0.034437
k119_53282	Rubrobacter	Amino_Acids_and_Derivatives	Methionine_Degradation	Methionine_gamma_lyase_(EC_4.4.1.11)	2.6278	4.60253	0.00558396	0.0562081
k119_115272	Geodermatophilaceae	Amino_Acids_and_Derivatives	Methionine_Degradation	Pyruvate_dehydrogenase_E1_component_(EC_1.2.4.1)	4.26467	3.75441	0.00969015	0.074527
k119_536319	Nocardioidaceae	Amino_Acids_and_Derivatives	Methionine_Degradation	Pyruvate_dehydrogenase_E1_component_(EC_1.2.4.1)	4.42633	3.54223	0.0136737	0.0895194
k119_186047	Nitrososphaera	Amino_Acids_and_Derivatives	Methionine_Salvage	5'_methylthioadenosine_phosphorylase_(EC_2.4.2.28)	2.62342	4.88182	0.00538285	0.0552374
k119_417256	Actinobacteria <phylum>	Amino_Acids_and_Derivatives	Methionine_Salvage	5'_methylthioadenosine_phosphorylase_(EC_2.4.2.28)	4.58766	4.48432	0.0120415	0.0836035
k119_493649	Rubrobacter xylanophilus DSM 9941	Amino_Acids_and_Derivatives	Phenylalanine_and_Tyrosine_Branches_from_Chorismate	Biosynthetic_Aromatic_amino_acid_aminotransferase_beta_(EC_2.6.1.57)	2.75934	4.7741	0.00404159	0.0479218
k119_437701	Terrabacteria group	Amino_Acids_and_Derivatives	PII_Superfamily	Cobalt_zinc_cadmium_resistance_protein_CzcA	3.93021	5.20242	0.00525827	0.0545378
k119_41341	Bacteria	Amino_Acids_and_Derivatives	PII_Superfamily	Cobalt_zinc_cadmium_resistance_protein_CzcA	4.39526	4.84184	0.00633162	0.0599755
k119_192796	Bacteria	Amino_Acids_and_Derivatives	PII_Superfamily	Cobalt_zinc_cadmium_resistance_protein_CzcA	2.23223	4.0468	0.0139648	0.090633
k119_420423	Bacteria	Amino_Acids_and_Derivatives	PII_Superfamily	Cobalt_zinc_cadmium_resistance_protein_CzcA	2.67028	3.97418	0.00937054	0.0733192
k119_131756	Actinobacteria <phylum>	Amino_Acids_and_Derivatives	PII_Superfamily	Nitrogen_regulatory_protein_P_II	2.97169	4.9953	0.00574443	0.0570757
k119_100398	Bacteria	Amino_Acids_and_Derivatives	Poly_gamma_glutamate_biosynthesis	Gamma_glutamyltranspeptidase_(EC_2.3.2.2)	2.71444	4.66428	0.00480076	0.0521534
k119_533657	Rubrobacter	Amino_Acids_and_Derivatives	Poly_gamma_glutamate_biosynthesis	Gamma_glutamyltranspeptidase_(EC_2.3.2.2)	2.1529	4.20791	0.00817304	0.0685827
k119_560955	Actinobacteria <phylum>	Amino_Acids_and_Derivatives	Polyamine_Metabolism	4_aminobutyraldehyde_dehydrogenase_(EC_1.2.1.19)	4.82513	5.06367	0.00113325	0.0256169
k119_29010	Actinobacteria <phylum>	Amino_Acids_and_Derivatives	Polyamine_Metabolism	4_aminobutyraldehyde_dehydrogenase_(EC_1.2.1.19)	2.14604	4.54104	0.00722819	0.064375
k119_89981	Actinobacteria <phylum>	Amino_Acids_and_Derivatives	Polyamine_Metabolism	4_aminobutyraldehyde_dehydrogenase_(EC_1.2.1.19)	3.05472	3.52276	0.0122096	0.0840677
k119_77254	Actinobacteria	Amino_Acids_and_Derivatives	Polyamine_Metabolism	ABC_transporter_periplasmic_spermidine_putrescine_binding_protein_PotD_(TC_3.A.1.11.1)	4.98783	5.45796	0.00854555	0.0700849
k119_49288	Rubrobacter	Amino_Acids_and_Derivatives	Polyamine_Metabolism	ABC_transporter_periplasmic_spermidine_putrescine_binding_protein_PotD_(TC_3.A.1.11.1)	4.03787	5.45089	0.000291002	0.0126267
k119_516133	Rubrobacter	Amino_Acids_and_Derivatives	Polyamine_Metabolism	ABC_transporter_periplasmic_spermidine_putrescine_binding_protein_PotD_(TC_3.A.1.11.1)	4.08257	4.49656	0.0026798	0.0390266
k119_530081	Rubrobacter	Amino_Acids_and_Derivatives	Polyamine_Metabolism	ABC_transporter_periplasmic_spermidine_putrescine_binding_protein_PotD_(TC_3.A.1.11.1)	3.69181	3.70062	0.00746405	0.0654486
k119_11670	Streptomyces	Amino_Acids_and_Derivatives	Polyamine_Metabolism	Putrescine_ABC_transporter_putrescine_binding_protein_PotF_(TC_3.A.1.11.2)	3.22529	3.78419	0.00919067	0.0726348
k119_49288	Rubrobacter	Amino_Acids_and_Derivatives	Polyamine_Metabolism	Putrescine_transport_ATP_binding_protein_PotA_(TC_3.A.1.11.1)	4.03787	5.45089	0.000291002	0.0126267
k119_262864	Rubrobacter	Amino_Acids_and_Derivatives	Polyamine_Metabolism	Putrescine_transport_ATP_binding_protein_PotA_(TC_3.A.1.11.1)	2.67781	4.96458	0.000864871	0.0225078
k119_284001	Bacteria	Amino_Acids_and_Derivatives	Polyamine_Metabolism	Putrescine_transport_ATP_binding_protein_PotA_(TC_3.A.1.11.1)	6.52973	4.54309	0.000147471	0.00851817
k119_586599	Rubrobacter	Amino_Acids_and_Derivatives	Polyamine_Metabolism	Putrescine_transport_ATP_binding_protein_PotA_(TC_3.A.1.11.1)	3.68005	3.96279	0.00577666	0.0572259
k119_11670	Streptomyces	Amino_Acids_and_Derivatives	Polyamine_Metabolism	Putrescine_transport_ATP_binding_protein_PotG_(TC_3.A.1.11.2)	3.22529	3.78419	0.00919067	0.0726348
k119_395280	Bacteria	Amino_Acids_and_Derivatives	Polyamine_Metabolism	Putrescine_transport_system_permease_protein_PotH_(TC_3.A.1.11.2)	3.0756	4.24053	0.00509991	0.0537287
k119_397397	Rubrobacter	Amino_Acids_and_Derivatives	Polyamine_Metabolism	Spermidine_Putrescine_ABC_transporter_permease_component_PotB_(TC_3.A.1.11.1)	3.54523	5.77551	0.000219347	0.0107554
k119_502814	Rubrobacter	Amino_Acids_and_Derivatives	Polyamine_Metabolism	Spermidine_Putrescine_ABC_transporter_permease_component_PotB_(TC_3.A.1.11.1)	4.89951	4.25813	0.00155597	0.0298564
k119_574847	Rubrobacter	Amino_Acids_and_Derivatives	Polyamine_Metabolism	Spermidine_Putrescine_ABC_transporter_permease_component_potC_(TC_3.A.1.11.1)	3.66881	4.162	0.0114856	0.0814742
k119_117821	Rubrobacter	Amino_Acids_and_Derivatives	Polyamine_Metabolism	Spermidine_Putrescine_ABC_transporter_permease_component_potC_(TC_3.A.1.11.1)	3.37915	3.34928	0.0102351	0.0767676
k119_397698	Rubrobacter	Amino_Acids_and_Derivatives	Proline_4_hydroxyproline_uptake_and_utilization	L_Proline/Glycine_betaine_transporter_ProP	3.10345	5.37506	0.00147285	0.0291807
k119_330512	Bacteria	Amino_Acids_and_Derivatives	Proline_4_hydroxyproline_uptake_and_utilization	L_Proline/Glycine_betaine_transporter_ProP	6.06219	5.36347	0.00144073	0.0288511
k119_231387	Bacteria	Amino_Acids_and_Derivatives	Proline_4_hydroxyproline_uptake_and_utilization	L_Proline/Glycine_betaine_transporter_ProP	3.01415	5.08744	0.00387476	0.0467563
k119_76997	Actinobacteria <phylum>	Amino_Acids_and_Derivatives	Proline_4_hydroxyproline_uptake_and_utilization	L_Proline/Glycine_betaine_transporter_ProP	5.36504	4.4478	0.00288291	0.0403589
k119_236321	Actinobacteria <phylum>	Amino_Acids_and_Derivatives	Proline_4_hydroxyproline_uptake_and_utilization	L_Proline/Glycine_betaine_transporter_ProP	4.39846	4.3587	0.0111459	0.080134
k119_399350	Rubrobacter	Amino_Acids_and_Derivatives	Proline_4_hydroxyproline_uptake_and_utilization	Proline_dehydrogenase_(EC_1.5.99.8)_(Proline_oxidase)	2.68229	4.23883	0.00989891	0.075366
k119_517499	Rubrobacter	Amino_Acids_and_Derivatives	Proline_4_hydroxyproline_uptake_and_utilization	Proline_dehydrogenase_(EC_1.5.99.8)_(Proline_oxidase)	2.37057	3.81529	0.014208	0.091493
k119_493762	Rubrobacter	Amino_Acids_and_Derivatives	Proline_4_hydroxyproline_uptake_and_utilization	Proline_dehydrogenase_(EC_1.5.99.8)_(Proline_oxidase)	7.92496	3.57871	0.00267697	0.0390053
k119_281362	cellular organisms	Amino_Acids_and_Derivatives	Proline_4_hydroxyproline_uptake_and_utilization	Proline_iminopeptidase_(EC_3.4.11.5)	5.35852	3.39897	0.00903634	0.0720004
k119_538321	Actinobacteria	Amino_Acids_and_Derivatives	Sarcosine_oxidases_monomeric_and_heterotetrameric	Sarcosine_oxidase_beta_subunit_(EC_1.5.3.1)	2.91986	4.29434	0.0109237	0.0791137
k119_403141	Actinobacteria	Amino_Acids_and_Derivatives	Sarcosine_oxidases_monomeric_and_heterotetrameric	Sarcosine_oxidase_beta_subunit_(EC_1.5.3.1)	5.56005	3.00785	0.00789086	0.0673251
k119_299002	Pseudonocardiaceae	Amino_Acids_and_Derivatives	Sarcosine_oxidases_monomeric_and_heterotetrameric	Sarcosine_oxidase_gamma_subunit_(EC_1.5.3.1)	3.13512	4.28967	0.0165923	0.099527
k119_477490	Bacillales	Amino_Acids_and_Derivatives	Threonine_degradation	low_specificity_D_threonine_aldolase	2.61901	4.85736	0.00559875	0.0562647
k119_323505	Rubrobacter	Amino_Acids_and_Derivatives	Threonine_degradation	Threonine_dehydrogenase_and_related_Zn_dependent_dehydrogenases	3.74312	5.6035	0.000939828	0.0234146
k119_260335	Actinobacteria	Amino_Acids_and_Derivatives	Threonine_degradation	Threonine_dehydrogenase_and_related_Zn_dependent_dehydrogenases	3.19175	5.19038	0.00547397	0.0556138
k119_532023	Actinobacteria <phylum>	Amino_Acids_and_Derivatives	Threonine_degradation	Threonine_dehydrogenase_and_related_Zn_dependent_dehydrogenases	3.04072	4.8222	0.0155825	0.0961034
k119_202088	Rubrobacter xylanophilus	Amino_Acids_and_Derivatives	Threonine_degradation	Threonine_dehydrogenase_and_related_Zn_dependent_dehydrogenases	2.3128	4.77905	0.00879658	0.0711389
k119_125637	Rubrobacter	Amino_Acids_and_Derivatives	Threonine_degradation	Threonine_dehydrogenase_and_related_Zn_dependent_dehydrogenases	5.99757	4.73379	0.000754856	0.0209812
k119_416279	Actinobacteria <phylum>	Amino_Acids_and_Derivatives	Threonine_degradation	Threonine_dehydrogenase_and_related_Zn_dependent_dehydrogenases	3.38006	4.69691	0.00428649	0.0492478
k119_515759	Actinobacteria <phylum>	Amino_Acids_and_Derivatives	Threonine_degradation	Threonine_dehydrogenase_and_related_Zn_dependent_dehydrogenases	2.59436	4.0504	0.0145826	0.0926459
k119_235383	Nitrososphaera	Amino_Acids_and_Derivatives	Threonine_degradation	Threonine_dehydrogenase_and_related_Zn_dependent_dehydrogenases	9.24992	4.01476	0.00238228	0.0370411
k119_585348	Actinobacteria	Amino_Acids_and_Derivatives	Threonine_degradation	Threonine_dehydrogenase_and_related_Zn_dependent_dehydrogenases	2.64606	3.95543	0.0156012	0.0961577
k119_122297	Rubrobacter	Amino_Acids_and_Derivatives	Threonine_degradation	Threonine_dehydrogenase_and_related_Zn_dependent_dehydrogenases	3.32821	3.86814	0.00426825	0.0491715
k119_578272	Bacteria	Amino_Acids_and_Derivatives	Threonine_degradation	Threonine_dehydrogenase_and_related_Zn_dependent_dehydrogenases	8.65237	3.79783	0.00589585	0.0578018
k119_376862	Bacteroidetes	Amino_Acids_and_Derivatives	Threonine_degradation	Threonine_dehydrogenase_and_related_Zn_dependent_dehydrogenases	7.97178	3.66996	0.00101856	0.0243128
k119_115068	Actinobacteria <phylum>	Amino_Acids_and_Derivatives	Threonine_degradation	Threonine_dehydrogenase_and_related_Zn_dependent_dehydrogenases	3.43614	3.66773	0.0078126	0.0669966
k119_387667	Rubrobacter xylanophilus	Amino_Acids_and_Derivatives	Threonine_degradation	Threonine_dehydrogenase_and_related_Zn_dependent_dehydrogenases	3.92723	3.44991	0.0125701	0.0855094
k119_380117	Actinobacteria <phylum>	Amino_Acids_and_Derivatives	Threonine_degradation	Threonine_dehydrogenase_and_related_Zn_dependent_dehydrogenases	32.1371	3.08881	0.00253709	0.0380955
k119_107645	Actinobacteria <phylum>	Amino_Acids_and_Derivatives	Threonine_degradation	Threonine_dehydrogenase_and_related_Zn_dependent_dehydrogenases	12.7818	2.80792	0.00256625	0.0382611
k119_335205	Bacteria	Amino_Acids_and_Derivatives	Threonine_degradation	Threonine_dehydrogenase_and_related_Zn_dependent_dehydrogenases	7.05314	2.72776	0.0161785	0.0980958
k119_270316	Rubrobacter aplysinae	Amino_Acids_and_Derivatives	Tryptophan_biosynthesis_in_Streptococci	Aminodeoxychorismate_lyase_(EC_4.1.3.38)	4.14683	4.05806	0.00450543	0.0505149
k119_199414	Rubrobacter	Amino_Acids_and_Derivatives	Tryptophan_biosynthesis_in_Streptococci	Anthranilate_synthase_aminase_component_(EC_4.1.3.27)	4.05845	5.15538	0.000351837	0.013903
k119_281766	Rubrobacter xylanophilus	Amino_Acids_and_Derivatives	Tryptophan_biosynthesis_in_Streptococci	Para_aminobenzoate_synthase_aminase_component_(EC_2.6.1.85)	4.99286	4.3101	0.0078061	0.0669873
k119_190592	Rubrobacter	Amino_Acids_and_Derivatives	Tryptophan_biosynthesis_in_Streptococci	Phosphoribosylanthranilate_isomerase_(EC_5.3.1.24)	2.90199	5.00055	0.0051459	0.0540103
k119_423947	Candidatus Nitrososphaera gargensis Ga9.2	Amino_Acids_and_Derivatives	Tryptophan_biosynthesis_in_Streptococci	Tryptophan_synthase_alpha_chain_(EC_4.2.1.20)	2.61167	4.71612	0.0144018	0.0920914
k119_528710	Rubrobacter	Amino_Acids_and_Derivatives	Tryptophan_biosynthesis_in_Streptococci	Tryptophan_synthase_beta_chain_(EC_4.2.1.20)	6.36074	4.86798	8.48125e-05	0.00601453
k119_58671	Thaumarchaeota	Amino_Acids_and_Derivatives	Tryptophan_biosynthesis_in_Streptococci	Tryptophan_synthase_beta_chain_(EC_4.2.1.20)	5.00586	4.48284	0.0023869	0.0370541
k119_327958	cellular organisms	Amino_Acids_and_Derivatives	Tryptophan_catabolism	Kynurenine_formamidase_(EC_3.5.1.9)	2.55579	5.11278	0.00357772	0.0450839
k119_366321	Terrabacteria group	Amino_Acids_and_Derivatives	Tryptophan_catabolism	Kynurenine_formamidase_(EC_3.5.1.9)	5.6166	4.50643	0.00160785	0.0303428
k119_517603	Rubrobacter	Amino_Acids_and_Derivatives	Tryptophan_synthesis	Tryptophan_synthase_beta_chain_like_(EC_4.2.1.20)	3.60677	5.65142	0.000143418	0.00834818
k119_520598	Bacteria	Amino_Acids_and_Derivatives	Tryptophan_synthesis	Tryptophan_synthase_beta_chain_like_(EC_4.2.1.20)	3.50462	4.87068	0.00956726	0.0741429
k119_267330	Bacillus	Amino_Acids_and_Derivatives	Urea_decomposition	Allophanate_hydrolase_(EC_3.5.1.54)	2.74128	4.47857	0.0160173	0.0975485
k119_228846	cellular organisms	Amino_Acids_and_Derivatives	Urea_decomposition	Nickel_transporter_UreH	3.03371	4.95791	0.00632915	0.0599752
k119_559342	Terrabacteria group	Amino_Acids_and_Derivatives	Urea_decomposition	Nickel_transporter_UreH	3.19671	4.39022	0.0109137	0.0790596
k119_230678	Rubrobacter	Amino_Acids_and_Derivatives	Urea_decomposition	Nickel_transporter_UreH	6.42876	3.79351	0.00165234	0.0307789
k119_368215	Rubrobacter	Amino_Acids_and_Derivatives	Urea_decomposition	Nickel_transporter_UreH	2.76896	3.39026	0.015812	0.0968112
k119_522985	Actinobacteria <phylum>	Amino_Acids_and_Derivatives	Urea_decomposition	Urea_channel_UreI	4.51017	3.28244	0.010313	0.076963
k119_319883	Nitrososphaera	Amino_Acids_and_Derivatives	Urea_decomposition	Urease_accessory_protein_UreG	4.104	4.57645	0.00207653	0.0345819
k119_77000	Rubrobacter xylanophilus	Carbohydrates	2_O_alpha_mannosyl_D_glycerate_utilization	Alpha_mannosidase_(EC_3.2.1.24)	3.20853	5.62535	0.000276606	0.0121954
k119_118329	Rubrobacter xylanophilus	Carbohydrates	2_O_alpha_mannosyl_D_glycerate_utilization	Alpha_mannosidase_(EC_3.2.1.24)	2.65649	4.78055	0.0113467	0.0809382
k119_457641	cellular organisms	Carbohydrates	Acetoin_butanediol_metabolism	23_butanediol_dehydrogenase_S_alcohol_forming_(S)_acetoin_specific_(EC_1.1.1.76)	7.01314	4.40766	0.00101229	0.0242614
k119_331881	Terrabacteria group	Carbohydrates	Acetoin_butanediol_metabolism	Acetoin_dehydrogenase_E1_component_alpha_subunit_(EC_1.2.4._)	2.61518	4.98988	0.0031961	0.0426016
k119_27766	Terrabacteria group	Carbohydrates	Acetoin_butanediol_metabolism	Acetoin_dehydrogenase_E1_component_beta_subunit_(EC_1.2.4._)	3.52306	3.52427	0.0143031	0.0918061
k119_500472	Cyanobacteria	Carbohydrates	Acetoin_butanediol_metabolism	Dihydrolipoamide_acetyltransferase_component_(E2)_of_acetoin_dehydrogenase_complex_(EC_2.3.1._)	3.40639	3.75952	0.0131423	0.0876479
k119_513781	Bacilli	Carbohydrates	Acetone_Butanol_Ethanol_Synthesis	3_hydroxybutyryl_CoA_dehydrogenase_(EC_1.1.1.157)	3.12704	4.45377	0.00363582	0.0454134
k119_305412	Bacteria	Carbohydrates	Acetone_Butanol_Ethanol_Synthesis	Acetyl_CoA:acetoacetyl_CoA_transferase_alpha_subunit_(EC_2.8.3.8)	4.24262	5.13668	0.00234058	0.0367223
k119_587958	Bacteria	Carbohydrates	Acetone_Butanol_Ethanol_Synthesis	Acetyl_CoA:acetoacetyl_CoA_transferase_alpha_subunit_(EC_2.8.3.8)	4.27886	4.55888	0.00366932	0.0456146
k119_201529	Cyanobacteria	Carbohydrates	Acetone_Butanol_Ethanol_Synthesis	Alcohol_dehydrogenase_(EC_1.1.1.1)	6.39364	6.11401	0.000232771	0.0110606
k119_302200	Thaumarchaeota	Carbohydrates	Acetone_Butanol_Ethanol_Synthesis	Alcohol_dehydrogenase_(EC_1.1.1.1)	2.94193	4.63767	0.00837808	0.0692903
k119_452033	Bacteria	Carbohydrates	Acetone_Butanol_Ethanol_Synthesis	Alcohol_dehydrogenase_(EC_1.1.1.1)	3.93632	4.27906	0.0162381	0.0982663
k119_574363	cellular organisms	Carbohydrates	Acetone_Butanol_Ethanol_Synthesis	Alcohol_dehydrogenase_(EC_1.1.1.1)	4.83253	4.14233	0.0054574	0.0555468
k119_558196	Rubrobacter	Carbohydrates	Acetone_Butanol_Ethanol_Synthesis	Alcohol_dehydrogenase_(EC_1.1.1.1)	3.69658	3.82732	0.00300803	0.0412997
k119_217402	Rubrobacter	Carbohydrates	Acetone_Butanol_Ethanol_Synthesis	Alcohol_dehydrogenase_(EC_1.1.1.1)	2.80026	3.697	0.014719	0.0931044
k119_212340	Bacteria	Carbohydrates	Acetyl_CoA_biosynthesis_in_plants	Dihydrolipoamide_acetyltransferase_component_of_pyruvate_dehydrogenase_complex_(EC_2.3.1.12)	4.35809	5.80281	0.00185496	0.0325971
k119_511303	Rubrobacter radiotolerans	Carbohydrates	Acetyl_CoA_biosynthesis_in_plants	Dihydrolipoamide_acetyltransferase_component_of_pyruvate_dehydrogenase_complex_(EC_2.3.1.12)	4.46284	4.09308	0.00285219	0.04016
k119_184821	Rubrobacter	Carbohydrates	Acetyl_CoA_biosynthesis_in_plants	Dihydrolipoamide_acetyltransferase_component_of_pyruvate_dehydrogenase_complex_(EC_2.3.1.12)	4.21759	3.2174	0.012568	0.0855094
k119_510854	Rubrobacter	Carbohydrates	Acetyl_CoA_biosynthesis_in_plants	Pyruvate_dehydrogenase_E1_component_alpha_subunit_(EC_1.2.4.1)	4.24901	4.8033	0.00222274	0.0358461
k119_370984	Rubrobacter radiotolerans	Carbohydrates	Acetyl_CoA_biosynthesis_in_plants	Pyruvate_dehydrogenase_E1_component_alpha_subunit_(EC_1.2.4.1)	3.53712	3.83593	0.0123103	0.0844776
k119_121171	Rubrobacter	Carbohydrates	Acetyl_CoA_biosynthesis_in_plants	Pyruvate_dehydrogenase_E1_component_alpha_subunit_(EC_1.2.4.1)	5.63224	3.79628	0.00285628	0.0401869
k119_198060	Rubrobacter	Carbohydrates	Acetyl_CoA_biosynthesis_in_plants	Pyruvate_dehydrogenase_E1_component_alpha_subunit_(EC_1.2.4.1)	5.33223	2.99721	0.00589906	0.057813
k119_181997	Rubrobacter	Carbohydrates	Acetyl_CoA_biosynthesis_in_plants	Pyruvate_dehydrogenase_E1_component_alpha_subunit_(EC_1.2.4.1)	7.17142	2.65269	0.0160797	0.0977401
k119_48790	Alphaproteobacteria	Carbohydrates	Acetyl_CoA_biosynthesis_in_plants	Pyruvate_dehydrogenase_E1_component_beta_subunit_(EC_1.2.4.1)	6.63156	3.53403	0.00504542	0.0534485
k119_184821	Rubrobacter	Carbohydrates	Acetyl_CoA_biosynthesis_in_plants	Pyruvate_dehydrogenase_E1_component_beta_subunit_(EC_1.2.4.1)	4.21759	3.2174	0.012568	0.0855094
k119_181997	Rubrobacter	Carbohydrates	Acetyl_CoA_biosynthesis_in_plants	Pyruvate_dehydrogenase_E1_component_beta_subunit_(EC_1.2.4.1)	7.17142	2.65269	0.0160797	0.0977401
k119_478001	Rubrobacter xylanophilus	Carbohydrates	acinetobacter_tca	2_oxoglutarate_dehydrogenase_E1_component_(EC_1.2.4.2)	3.72135	4.89042	0.0012536	0.026765
k119_449232	Rubrobacter xylanophilus	Carbohydrates	acinetobacter_tca	2_oxoglutarate_dehydrogenase_E1_component_(EC_1.2.4.2)	2.56192	4.47493	0.00498434	0.053071
k119_243394	Rubrobacter	Carbohydrates	acinetobacter_tca	Dihydrolipoamide_succinyltransferase_component_(E2)_of_2_oxoglutarate_dehydrogenase_complex_(EC_2.3.1.61)	3.30317	4.9878	0.0011693	0.0259434
k119_141883	Nocardioidaceae	Carbohydrates	acinetobacter_tca	Dihydrolipoamide_succinyltransferase_component_(E2)_of_2_oxoglutarate_dehydrogenase_complex_(EC_2.3.1.61)	2.1748	4.70798	0.00454062	0.0506834
k119_96346	Bacteria	Carbohydrates	acinetobacter_tca	Dihydrolipoamide_succinyltransferase_component_(E2)_of_2_oxoglutarate_dehydrogenase_complex_(EC_2.3.1.61)	3.48156	4.46632	0.00901117	0.0719199
k119_150086	Rubrobacter radiotolerans	Carbohydrates	acinetobacter_tca	Fumarate_hydratase_class_I_aerobic_(EC_4.2.1.2)	2.15162	4.55785	0.0159296	0.0972697
k119_265161	Rubrobacter	Carbohydrates	acinetobacter_tca	Fumarate_hydratase_class_II_(EC_4.2.1.2)	5.47993	4.77597	0.000194865	0.00996097
k119_255355	Actinobacteria	Carbohydrates	acinetobacter_tca	Malate_dehydrogenase_(EC_1.1.1.37)	2.28209	5.11196	0.00116792	0.0259429
k119_581256	Actinobacteria <phylum>	Carbohydrates	acinetobacter_tca	Malate_dehydrogenase_(EC_1.1.1.37)	4.49621	4.65358	0.0010635	0.0247515
k119_4476	Actinobacteria <phylum>	Carbohydrates	acinetobacter_tca	Malate_dehydrogenase_(EC_1.1.1.37)	2.32646	4.50665	0.013325	0.0882926
k119_108935	Terrabacteria group	Carbohydrates	acinetobacter_tca	Malate_dehydrogenase_(EC_1.1.1.37)	3.26332	4.14861	0.00480464	0.0521725
k119_393610	Actinobacteria	Carbohydrates	acinetobacter_tca	Succinate_dehydrogenase_flavoprotein_subunit_(EC_1.3.99.1)	2.32615	5.01704	0.0016578	0.0308119
k119_441322	Nitrososphaera	Carbohydrates	acinetobacter_tca	Succinate_dehydrogenase_flavoprotein_subunit_(EC_1.3.99.1)	4.68058	4.53988	0.0029026	0.0405118
k119_9681	Mycobacterium	Carbohydrates	acinetobacter_tca	Succinate_dehydrogenase_flavoprotein_subunit_(EC_1.3.99.1)	4.61468	4.13593	0.00347218	0.0444339
k119_577237	Rubrobacter	Carbohydrates	acinetobacter_tca	Succinate_dehydrogenase_flavoprotein_subunit_(EC_1.3.99.1)	5.95003	3.28555	0.00680787	0.0623913
k119_284041	cellular organisms	Carbohydrates	acinetobacter_tca	Succinate_dehydrogenase_flavoprotein_subunit_(EC_1.3.99.1)	5.66283	3.02573	0.0107617	0.0785322
k119_393928	Acidobacteria	Carbohydrates	acinetobacter_tca	Succinate_dehydrogenase_iron_sulfur_protein_(EC_1.3.99.1)	2.9369	5.05035	0.0156057	0.0961668
k119_484433	Rubrobacter	Carbohydrates	acinetobacter_tca	Succinate_dehydrogenase_iron_sulfur_protein_(EC_1.3.99.1)	4.44993	3.84476	0.0117093	0.0822904
k119_309961	Rubrobacter	Carbohydrates	acinetobacter_tca	Succinate_dehydrogenase_iron_sulfur_protein_(EC_1.3.99.1)	2.60638	3.82727	0.0140289	0.0908465
k119_73450	Actinobacteria	Carbohydrates	acinetobacter_tca	Succinate_dehydrogenase_iron_sulfur_protein_(EC_1.3.99.1)	4.70617	3.40109	0.0135858	0.0892669
k119_542813	cellular organisms	Carbohydrates	acinetobacter_tca	Succinyl_CoA_ligase_[ADP_forming]_alpha_chain_(EC_6.2.1.5)	2.27886	4.43729	0.00467482	0.0514635
k119_65000	Rubrobacter	Carbohydrates	acinetobacter_tca	Succinyl_CoA_ligase_[ADP_forming]_alpha_chain_(EC_6.2.1.5)	3.99022	4.35509	0.000896291	0.0228658
k119_555426	Thaumarchaeota	Carbohydrates	acinetobacter_tca	Succinyl_CoA_ligase_[ADP_forming]_alpha_chain_(EC_6.2.1.5)	5.85877	4.12923	0.00376412	0.046043
k119_486115	Bacteria	Carbohydrates	acinetobacter_tca	Succinyl_CoA_ligase_[ADP_forming]_beta_chain_(EC_6.2.1.5)	26.5036	8.14099	1.47098e-06	0.000381391
k119_461978	Planctomycetaceae	Carbohydrates	acinetobacter_tca	Succinyl_CoA_ligase_[ADP_forming]_beta_chain_(EC_6.2.1.5)	4.47355	4.58498	0.00165454	0.0307889
k119_405554	Sphaerobacter thermophilus	Carbohydrates	acinetobacter_tca	Succinyl_CoA_ligase_[ADP_forming]_beta_chain_(EC_6.2.1.5)	8.09309	4.50998	0.010455	0.0775259
k119_120214	Chloroflexi bacterium 54-19	Carbohydrates	acinetobacter_tca	Succinyl_CoA_ligase_[ADP_forming]_beta_chain_(EC_6.2.1.5)	4.48189	4.01853	0.0139103	0.0904263
k119_148913	Rubrobacter	Carbohydrates	acinetobacter_tca	Succinyl_CoA_ligase_[ADP_forming]_beta_chain_(EC_6.2.1.5)	2.55886	3.71473	0.0138528	0.0902086
k119_201286	Bacteria	Carbohydrates	acinetobacter_tca	Succinyl_CoA_ligase_[ADP_forming]_beta_chain_(EC_6.2.1.5)	6.51783	3.69971	0.0153741	0.0954114
k119_275940	Bacteria	Carbohydrates	acinetobacter_tca	Succinyl_CoA_ligase_[ADP_forming]_beta_chain_(EC_6.2.1.5)	3.59556	3.49639	0.012779	0.0863389
k119_300190	Acidobacteriaceae	Carbohydrates	Alpha_Amylase_locus_in_Streptocococcus	Cyclomaltodextrin_glucanotransferase_(EC_2.4.1.19)	6.69981	5.88286	0.000359244	0.0139937
k119_214210	Rubrobacter xylanophilus	Carbohydrates	Alpha_Amylase_locus_in_Streptocococcus	Maltose/maltodextrin_ABC_transporter_substrate_binding_periplasmic_protein_MalE	4.57167	6.21404	1.24085e-05	0.00169484
k119_114604	Solirubrobacter	Carbohydrates	Alpha_Amylase_locus_in_Streptocococcus	Maltose/maltodextrin_ABC_transporter_substrate_binding_periplasmic_protein_MalE	3.89202	5.07425	0.00344508	0.0441963
k119_181872	Rubrobacter xylanophilus	Carbohydrates	Alpha_Amylase_locus_in_Streptocococcus	Maltose/maltodextrin_ABC_transporter_substrate_binding_periplasmic_protein_MalE	2.57386	4.51301	0.00259469	0.0384934
k119_460797	Rubrobacter radiotolerans	Carbohydrates	Alpha_Amylase_locus_in_Streptocococcus	Maltose/maltodextrin_ABC_transporter_substrate_binding_periplasmic_protein_MalE	4.14551	4.40088	0.00271339	0.0392221
k119_376418	Proteobacteria	Carbohydrates	alpha_carboxysome	carboxysome_shell_protein_CsoS1	12.0128	4.34113	0.00159089	0.0301738
k119_243945	Bradyrhizobium	Carbohydrates	alpha_carboxysome	carboxysome_shell_protein_CsoS3	4.96805	4.68687	0.0074802	0.0655193
k119_294936	Thermomicrobia	Carbohydrates	alpha_carboxysome	NADH_ubiquinone_oxidoreductase_chain_L_(EC_1.6.5.3)	4.00665	5.22544	0.000332148	0.0134708
k119_21560	Rubrobacter xylanophilus	Carbohydrates	alpha_carboxysome	NADH_ubiquinone_oxidoreductase_chain_L_(EC_1.6.5.3)	2.29489	4.68508	0.0145569	0.0925546
k119_463748	Rubrobacter xylanophilus	Carbohydrates	alpha_carboxysome	NADH_ubiquinone_oxidoreductase_chain_L_(EC_1.6.5.3)	2.37882	4.55011	0.0159846	0.0974316
k119_465365	Rubrobacter xylanophilus	Carbohydrates	alpha_carboxysome	NADH_ubiquinone_oxidoreductase_chain_L_(EC_1.6.5.3)	2.50619	4.26824	0.0155312	0.0959184
k119_138594	Actinobacteria	Carbohydrates	alpha_carboxysome	NADH_ubiquinone_oxidoreductase_chain_L_(EC_1.6.5.3)	2.71618	4.07789	0.0160154	0.0975485
k119_397198	Rubrobacter xylanophilus	Carbohydrates	alpha_carboxysome	NADH_ubiquinone_oxidoreductase_chain_L_(EC_1.6.5.3)	4.6817	3.94849	0.0109525	0.0792364
k119_119317	Rubrobacter xylanophilus	Carbohydrates	alpha_carboxysome	NADH_ubiquinone_oxidoreductase_chain_L_(EC_1.6.5.3)	6.45993	3.74292	0.00878914	0.0711126
k119_387312	Proteobacteria	Carbohydrates	alpha_carboxysome	NADH_ubiquinone_oxidoreductase_chain_L_(EC_1.6.5.3)	5.39838	3.63139	0.00873702	0.0709377
k119_93775	Proteobacteria	Carbohydrates	alpha_carboxysome	Possible_pterin_4_alpha_carbinolamine_dehydratase_like_protein	4.18787	5.29486	0.00184576	0.0325514
k119_449925	Bacteria	Carbohydrates	alpha_carboxysome	probable_RuBisCo_expression_protein_CbbX	6.15922	5.01217	0.00112982	0.0255703
k119_398508	Bacteria	Carbohydrates	alpha_carboxysome	probable_RuBisCo_expression_protein_CbbX	11.7993	4.99797	9.48389e-05	0.00647094
k119_177855	Bacteria	Carbohydrates	alpha_carboxysome	putative_carboxysome_peptide_A	8.61181	5.00382	0.00734212	0.0649425
k119_180054	Bacteria	Carbohydrates	alpha_carboxysome	putative_carboxysome_peptide_A	7.18724	4.63867	0.00379994	0.0463278
k119_180054	Bacteria	Carbohydrates	alpha_carboxysome	putative_carboxysome_peptide_B	7.18724	4.63867	0.00379994	0.0463278
k119_189784	Actinobacteria	Carbohydrates	alpha_carboxysome	Ribulose_bisphosphate_carboxylase_large_chain_(EC_4.1.1.39)	11.5455	6.01683	5.18665e-05	0.00438515
k119_552039	Actinobacteria	Carbohydrates	alpha_carboxysome	Ribulose_bisphosphate_carboxylase_large_chain_(EC_4.1.1.39)	6.57042	5.78138	2.66303e-05	0.00283547
k119_103167	Terrabacteria group	Carbohydrates	alpha_carboxysome	Ribulose_bisphosphate_carboxylase_large_chain_(EC_4.1.1.39)	19.5242	5.51315	2.12831e-05	0.0024121
k119_51002	Bacteria	Carbohydrates	alpha_carboxysome	Ribulose_bisphosphate_carboxylase_large_chain_(EC_4.1.1.39)	5.21976	5.46529	0.000503866	0.0167112
k119_174485	Bacteria	Carbohydrates	alpha_carboxysome	Ribulose_bisphosphate_carboxylase_large_chain_(EC_4.1.1.39)	9.93195	5.31426	0.000184595	0.0097095
k119_88756	Terrabacteria group	Carbohydrates	alpha_carboxysome	Ribulose_bisphosphate_carboxylase_large_chain_(EC_4.1.1.39)	5.38456	4.88159	0.000780628	0.0212632
k119_189253	Bacteria	Carbohydrates	alpha_carboxysome	Ribulose_bisphosphate_carboxylase_large_chain_(EC_4.1.1.39)	4.22653	4.60217	0.004827	0.0522733
k119_198484	Actinobacteria	Carbohydrates	alpha_carboxysome	Ribulose_bisphosphate_carboxylase_large_chain_(EC_4.1.1.39)	3.64342	4.04966	0.0131805	0.0877426
k119_323048	Proteobacteria	Carbohydrates	alpha_carboxysome	Ribulose_bisphosphate_carboxylase_large_chain_(EC_4.1.1.39)	5.868	4.00036	0.0132387	0.0879533
k119_33574	Bacteria	Carbohydrates	alpha_carboxysome	Ribulose_bisphosphate_carboxylase_large_chain_(EC_4.1.1.39)	10.358	3.70595	0.0099968	0.0757925
k119_455143	Terrabacteria group	Carbohydrates	alpha_carboxysome	Ribulose_bisphosphate_carboxylase_large_chain_(EC_4.1.1.39)	5.75247	3.64634	0.0108894	0.0790046
k119_152834	Bacteria	Carbohydrates	alpha_carboxysome	Ribulose_bisphosphate_carboxylase_small_chain_(EC_4.1.1.39)	3.44304	4.37665	0.0112948	0.0807378
k119_39104	Actinobacteria <phylum>	Carbohydrates	alpha_carboxysome	Ribulose_bisphosphate_carboxylase_small_chain_(EC_4.1.1.39)	6.31601	4.26157	0.00992332	0.0754446
k119_207108	Bacteria	Carbohydrates	alpha_carboxysome	Ribulose_bisphosphate_carboxylase_small_chain_(EC_4.1.1.39)	6.85847	4.04002	0.0123547	0.0846498
k119_514703	Rubrobacter	Carbohydrates	alpha_carboxysome	Xanthosine/inosine_triphosphate_pyrophosphatase	3.44991	4.16486	0.00225449	0.0360513
k119_10070	Actinobacteria <phylum>	Carbohydrates	beta_carboxysome	Carbonic_anhydrase_(EC_4.2.1.1)	2.37055	4.6436	0.0101981	0.0766073
k119_557209	Actinobacteria	Carbohydrates	beta_carboxysome	Carbonic_anhydrase_(EC_4.2.1.1)	2.63113	4.3489	0.0160157	0.0975485
k119_228305	Actinobacteria	Carbohydrates	beta_carboxysome	Carbonic_anhydrase_(EC_4.2.1.1)	2.95651	4.10072	0.007185	0.0641477
k119_513698	Actinobacteria <phylum>	Carbohydrates	beta_carboxysome	Carbonic_anhydrase_(EC_4.2.1.1)	2.52377	3.86984	0.0160542	0.0976473
k119_502003	Cyanobacteria	Carbohydrates	beta_carboxysome	High_affnity_carbon_uptake_protein_Hat/HatR	2.25542	4.41907	0.0165476	0.0993258
k119_324035	Rubrobacter	Carbohydrates	Calvin_Benson_cycle	Fructose_16_bisphosphatase_GlpX_type_(EC_3.1.3.11)	3.08728	5.28868	0.000863931	0.0225005
k119_256464	Rubrobacter	Carbohydrates	Calvin_Benson_cycle	Fructose_16_bisphosphatase_GlpX_type_(EC_3.1.3.11)	2.43487	4.34142	0.00821986	0.0687413
k119_559596	Rubrobacter	Carbohydrates	Calvin_Benson_cycle	Fructose_16_bisphosphatase_GlpX_type_(EC_3.1.3.11)	3.06491	3.96706	0.0132012	0.0878063
k119_108507	Rubrobacter	Carbohydrates	Calvin_Benson_cycle	Fructose_16_bisphosphatase_GlpX_type_(EC_3.1.3.11)	7.25616	3.06824	0.00765959	0.0663694
k119_153663	Sphingomonadales	Carbohydrates	Calvin_Benson_cycle	Fructose_bisphosphate_aldolase_class_I_(EC_4.1.2.13)	4.57186	6.10829	5.20421e-05	0.00438996
k119_470155	Bacteria	Carbohydrates	Calvin_Benson_cycle	Fructose_bisphosphate_aldolase_class_I_(EC_4.1.2.13)	6.70766	5.28832	0.00166693	0.0308945
k119_256477	Bacteria	Carbohydrates	Calvin_Benson_cycle	Fructose_bisphosphate_aldolase_class_I_(EC_4.1.2.13)	6.33714	5.1089	0.000592962	0.0183639
k119_584363	Rubrobacter xylanophilus	Carbohydrates	Calvin_Benson_cycle	Fructose_bisphosphate_aldolase_class_I_(EC_4.1.2.13)	6.42487	5.05486	0.000357177	0.0139647
k119_518590	Bacteria	Carbohydrates	Calvin_Benson_cycle	Fructose_bisphosphate_aldolase_class_I_(EC_4.1.2.13)	4.63429	5.04209	0.000488562	0.0165127
k119_70065	Bacteria	Carbohydrates	Calvin_Benson_cycle	Fructose_bisphosphate_aldolase_class_I_(EC_4.1.2.13)	8.3128	4.64491	0.00587312	0.0577495
k119_440316	Rubrobacter	Carbohydrates	Calvin_Benson_cycle	Fructose_bisphosphate_aldolase_class_I_(EC_4.1.2.13)	4.45659	4.3734	0.00350575	0.0446528
k119_476721	Rubrobacter	Carbohydrates	Calvin_Benson_cycle	Fructose_bisphosphate_aldolase_class_I_(EC_4.1.2.13)	20.2529	4.0797	0.000255785	0.0116218
k119_68934	Rubrobacter	Carbohydrates	Calvin_Benson_cycle	Fructose_bisphosphate_aldolase_class_I_(EC_4.1.2.13)	4.91798	3.91462	0.00935351	0.073248
k119_58993	Rubrobacter	Carbohydrates	Calvin_Benson_cycle	Fructose_bisphosphate_aldolase_class_I_(EC_4.1.2.13)	14.9746	2.4631	0.0137208	0.0897167
k119_513232	Bacteria	Carbohydrates	Calvin_Benson_cycle	Fructose_bisphosphate_aldolase_class_II_(EC_4.1.2.13)	4.15674	5.00329	0.00272624	0.0393249
k119_571117	Rubrobacter radiotolerans	Carbohydrates	Calvin_Benson_cycle	Fructose_bisphosphate_aldolase_class_II_(EC_4.1.2.13)	2.48724	3.57476	0.0126335	0.0857874
k119_466814	Rubrobacter	Carbohydrates	Calvin_Benson_cycle	NAD_dependent_glyceraldehyde_3_phosphate_dehydrogenase_(EC_1.2.1.12)	5.20269	4.72277	0.00072978	0.0205669
k119_36084	Actinobacteria <phylum>	Carbohydrates	Calvin_Benson_cycle	NAD_dependent_glyceraldehyde_3_phosphate_dehydrogenase_(EC_1.2.1.12)	2.77474	4.03807	0.00743637	0.0653704
k119_559637	Rubrobacter	Carbohydrates	Calvin_Benson_cycle	NAD_dependent_glyceraldehyde_3_phosphate_dehydrogenase_(EC_1.2.1.12)	7.66944	3.84811	0.00162371	0.0305299
k119_131372	Rubrobacter	Carbohydrates	Calvin_Benson_cycle	NAD_dependent_glyceraldehyde_3_phosphate_dehydrogenase_(EC_1.2.1.12)	3.21901	3.70496	0.00822488	0.0687679
k119_163757	Actinobacteria <phylum>	Carbohydrates	Calvin_Benson_cycle	NAD_dependent_glyceraldehyde_3_phosphate_dehydrogenase_(EC_1.2.1.12)	5.97284	3.6683	0.0136565	0.0894793
k119_356838	Thaumarchaeota	Carbohydrates	Calvin_Benson_cycle	NAD(P)_dependent_glyceraldehyde_3_phosphate_dehydrogenase_archaeal_(EC_1.2.1.59)	4.811	4.38471	0.00417452	0.0486856
k119_136464	Rubrobacter	Carbohydrates	Calvin_Benson_cycle	Phosphoglycerate_kinase_(EC_2.7.2.3)	2.33891	4.31124	0.0108497	0.0788947
k119_5373	Rubrobacter	Carbohydrates	Calvin_Benson_cycle	Ribulose_phosphate_3_epimerase_(EC_5.1.3.1)	2.18528	4.39713	0.0109795	0.0793774
k119_449273	Terrabacteria group	Carbohydrates	Calvin_Benson_cycle	Transketolase_(EC_2.2.1.1)	2.12371	4.58073	0.00371257	0.045738
k119_192131	Terrabacteria group	Carbohydrates	Calvin_Benson_cycle	Transketolase_(EC_2.2.1.1)	2.25825	4.25233	0.00831236	0.0689929
k119_390954	Terrabacteria group	Carbohydrates	Calvin_Benson_cycle	Transketolase_(EC_2.2.1.1)	5.98525	2.96631	0.0145543	0.0925457
k119_286427	Actinobacteria <phylum>	Carbohydrates	Calvin_Benson_cycle	Triosephosphate_isomerase_(EC_5.3.1.1)	3.18041	4.97075	0.00696891	0.0631389
k119_136920	Bacteria	Carbohydrates	Calvin_Benson_cycle	Triosephosphate_isomerase_(EC_5.3.1.1)	2.40489	4.21256	0.0109969	0.0794553
k119_552199	Rubrobacter	Carbohydrates	Calvin_Benson_cycle	Triosephosphate_isomerase_(EC_5.3.1.1)	3.97072	2.86922	0.0166771	0.0998239
k119_513618	unclassified Armatimonadetes	Carbohydrates	Carboxysome	NADH_dehydrogenase_(EC_1.6.99.3)	3.90991	5.10263	0.00466326	0.051387
k119_471433	Rubrobacter	Carbohydrates	Carboxysome	NADH_dehydrogenase_(EC_1.6.99.3)	2.46241	4.79078	0.00312435	0.0421181
k119_555577	Rubrobacter	Carbohydrates	Carboxysome	NADH_dehydrogenase_(EC_1.6.99.3)	3.94286	4.53511	0.00564274	0.0565315
k119_76213	Actinobacteria	Carbohydrates	Carboxysome	NADH_dehydrogenase_(EC_1.6.99.3)	2.43825	3.62556	0.0156096	0.0961693
k119_441733	Rubrobacter	Carbohydrates	Carboxysome	NADH_dehydrogenase_(EC_1.6.99.3)	3.21284	3.56718	0.0153137	0.0951797
k119_369075	Rubrobacter	Carbohydrates	Carboxysome	NADH_dehydrogenase_(EC_1.6.99.3)	7.18905	2.94693	0.00393633	0.0471539
k119_420119	Rubrobacter	Carbohydrates	Chitin_and_N_acetylglucosamine_utilization	Beta_hexosaminidase_(EC_3.2.1.52)	5.1616	4.75554	0.005551	0.056044
k119_28927	Micrococcaceae	Carbohydrates	Chitin_and_N_acetylglucosamine_utilization	N_Acetyl_D_glucosamine_ABC_transport_system_permease_protein_2	3.76762	4.39236	0.00423266	0.0489618
k119_67838	Bacteria	Carbohydrates	Chitin_and_N_acetylglucosamine_utilization	N_Acetyl_D_glucosamine_ABC_transport_system_permease_protein_2	3.77066	3.8487	0.00535102	0.0550704
k119_238506	Nitrososphaeraceae	Carbohydrates	Chitin_and_N_acetylglucosamine_utilization	N_Acetyl_D_glucosamine_ABC_transport_system_sugar_binding_protein	2.82351	5.00788	0.00702519	0.0633658
k119_114200	Paenibacillus	Carbohydrates	Chitin_and_N_acetylglucosamine_utilization	N_Acetyl_D_glucosamine_ABC_transport_system_sugar_binding_protein	6.19289	3.85466	0.0149343	0.0938556
k119_223631	Rubrobacter xylanophilus	Carbohydrates	Chitin_and_N_acetylglucosamine_utilization	Predicted_transcriptional_regulator_of_N_Acetylglucosamine_utilization_GntR_family	3.44257	4.9084	0.0023855	0.037048
k119_372811	Bacteria	Carbohydrates	Chitin_and_N_acetylglucosamine_utilization	Predicted_transcriptional_regulator_of_N_Acetylglucosamine_utilization_GntR_family	2.84835	4.75629	0.0148832	0.093646
k119_193736	Terrabacteria group	Carbohydrates	Chitin_and_N_acetylglucosamine_utilization	Predicted_transcriptional_regulator_of_N_Acetylglucosamine_utilization_GntR_family	5.03994	4.43517	0.00408567	0.0481843
k119_399296	Rubrobacter xylanophilus	Carbohydrates	Chitin_and_N_acetylglucosamine_utilization	Predicted_transcriptional_regulator_of_N_Acetylglucosamine_utilization_GntR_family	4.78964	4.35086	0.00621789	0.0594115
k119_85967	Rubrobacter xylanophilus	Carbohydrates	Chitin_and_N_acetylglucosamine_utilization	Predicted_transcriptional_regulator_of_N_Acetylglucosamine_utilization_GntR_family	3.3468	4.04828	0.0164553	0.0990105
k119_253625	Rubrobacter	Carbohydrates	Citrate_Metabolism_KE	Transaldolase_(EC_2.2.1.2)	4.9887	5.05403	0.00155941	0.0298825
k119_310141	Nitrososphaeraceae	Carbohydrates	Citrate_Metabolism_KE3	NADP_dependent_malic_enzyme_(EC_1.1.1.40)	3.5935	5.35016	0.0013925	0.0282918
k119_260711	Rubrobacter	Carbohydrates	Citrate_Metabolism_KE3	NADP_dependent_malic_enzyme_(EC_1.1.1.40)	4.42507	4.85015	0.00146066	0.0290536
k119_534380	Terrabacteria group	Carbohydrates	Citrate_Metabolism_KE3	NADP_dependent_malic_enzyme_(EC_1.1.1.40)	2.88593	4.79443	0.00155171	0.0298362
k119_116005	Rubrobacter	Carbohydrates	Citrate_Metabolism_KE4	Isocitrate_lyase_(EC_4.1.3.1)	3.13429	4.85195	0.00816272	0.0685505
k119_80823	Terrabacteria group	Carbohydrates	Citrate_Metabolism_KE4	Isocitrate_lyase_(EC_4.1.3.1)	2.80968	4.2015	0.0106075	0.0779731
k119_29629	Bacteria	Carbohydrates	Citrate_Metabolism_KE4	Isocitrate_lyase_(EC_4.1.3.1)	5.08407	3.22264	0.00471367	0.0516706
k119_306843	Rubrobacter	Carbohydrates	D_galactarate_D_glucarate_and_D_glycerate_catabolism	2_hydroxy_3_oxopropionate_reductase_(EC_1.1.1.60)	2.94291	5.38457	0.00100329	0.0241489
k119_230402	Rubrobacter	Carbohydrates	D_galactarate_D_glucarate_and_D_glycerate_catabolism	2_hydroxy_3_oxopropionate_reductase_(EC_1.1.1.60)	3.55964	5.17383	0.00164873	0.03075
k119_211271	Archaea	Carbohydrates	D_galactarate_D_glucarate_and_D_glycerate_catabolism	2_hydroxy_3_oxopropionate_reductase_(EC_1.1.1.60)	2.69384	4.71961	0.0157531	0.0965866
k119_519947	Terrabacteria group	Carbohydrates	D_galactarate_D_glucarate_and_D_glycerate_catabolism	2_hydroxy_3_oxopropionate_reductase_(EC_1.1.1.60)	2.78153	4.40353	0.010708	0.0783735
k119_358388	Rubrobacter	Carbohydrates	D_galactarate_D_glucarate_and_D_glycerate_catabolism	2_hydroxy_3_oxopropionate_reductase_(EC_1.1.1.60)	3.03399	4.12722	0.0153605	0.0953844
k119_476601	Bacteria	Carbohydrates	D_galactonate_catabolism	Galactonate_dehydratase_(EC_4.2.1.6)	3.39558	5.0544	0.00144963	0.0289379
k119_472454	Geodermatophilus obscurus	Carbohydrates	D_Galacturonate_and_D_Glucuronate_Utilization	2_dehydro_3_deoxygluconate_kinase_(EC_2.7.1.45)	2.31258	4.46061	0.00823498	0.0687839
k119_513077	Bacteria	Carbohydrates	D_Galacturonate_and_D_Glucuronate_Utilization	2_dehydro_3_deoxyphosphogluconate_aldolase_(EC_4.1.2.14)	3.50842	4.41127	0.00984861	0.0751779
k119_488721	Rubrobacter	Carbohydrates	D_Galacturonate_and_D_Glucuronate_Utilization	6_phosphogluconate_dehydrogenase_decarboxylating_(EC_1.1.1.44)	2.3646	4.21337	0.0113924	0.0810774
k119_32923	Rubrobacter aplysinae	Carbohydrates	D_Galacturonate_and_D_Glucuronate_Utilization	6_phosphogluconate_dehydrogenase_decarboxylating_(EC_1.1.1.44)	2.61106	4.05552	0.00708585	0.0636443
k119_365279	Rubrobacter	Carbohydrates	D_Galacturonate_and_D_Glucuronate_Utilization	6_phosphogluconate_dehydrogenase_decarboxylating_(EC_1.1.1.44)	3.73805	3.96425	0.0148986	0.0937111
k119_531187	Bacteria	Carbohydrates	D_Galacturonate_and_D_Glucuronate_Utilization	Alpha_glucosidase_(EC_3.2.1.20)	2.57509	4.87483	0.00941797	0.0735113
k119_407043	Bacteria	Carbohydrates	D_Galacturonate_and_D_Glucuronate_Utilization	Alpha_glucosidase_(EC_3.2.1.20)	5.08085	4.4768	0.00151799	0.0295421
k119_259692	Bacteria	Carbohydrates	D_Galacturonate_and_D_Glucuronate_Utilization	Alpha_glucosidase_(EC_3.2.1.20)	4.65704	4.38501	0.00306782	0.0417253
k119_486384	Terrabacteria group	Carbohydrates	D_gluconate_and_ketogluconates_metabolism	Gluconate_2_dehydrogenase_(EC_1.1.99.3)_membrane_bound_flavoprotein	4.86785	5.96912	0.000352561	0.0139093
k119_9413	Bacteria	Carbohydrates	D_gluconate_and_ketogluconates_metabolism	Gluconate_2_dehydrogenase_(EC_1.1.99.3)_membrane_bound_flavoprotein	3.10557	4.31888	0.0116299	0.0820173
k119_136729	Bacteria	Carbohydrates	D_gluconate_and_ketogluconates_metabolism	Glucose_1_dehydrogenase_(EC_1.1.1.47)	5.76793	5.24133	0.00484822	0.0523908
k119_390903	Bacteria	Carbohydrates	D_gluconate_and_ketogluconates_metabolism	Glucose_1_dehydrogenase_(EC_1.1.1.47)	2.7488	5.00659	0.0124691	0.0851394
k119_409651	Terrabacteria group	Carbohydrates	D_gluconate_and_ketogluconates_metabolism	Glucose_1_dehydrogenase_(EC_1.1.1.47)	3.07677	4.37093	0.00581032	0.0574115
k119_27148	Terrabacteria group	Carbohydrates	D_mannitol_and_D_mannose_degradation_in_plants	Mannose_6_phosphate_isomerase_(EC_5.3.1.8)	2.91711	4.33238	0.00707272	0.0635707
k119_221345	Actinobacteria <phylum>	Carbohydrates	D_ribose_utilization	Ribose_ABC_transport_system_ATP_binding_protein_RbsA_(TC_3.A.1.2.1)	4.17552	4.61238	0.00190682	0.0331067
k119_355445	Bacteria	Carbohydrates	D_ribose_utilization	Ribose_ABC_transport_system_ATP_binding_protein_RbsA_(TC_3.A.1.2.1)	12.5318	3.55751	0.00502099	0.0532936
k119_276160	Burkholderiaceae	Carbohydrates	D_ribose_utilization	Ribose_ABC_transport_system_periplasmic_ribose_binding_protein_RbsB_(TC_3.A.1.2.1)	5.71546	3.93801	0.00373505	0.0458926
k119_178208	Actinobacteria	Carbohydrates	D_ribose_utilization	Ribose_ABC_transport_system_periplasmic_ribose_binding_protein_RbsB_(TC_3.A.1.2.1)	6.29508	3.34053	0.00259075	0.038465
k119_459232	Bacteria	Carbohydrates	D_ribose_utilization	Ribose_ABC_transport_system_permease_protein_RbsC_(TC_3.A.1.2.1)	3.63529	5.60456	0.00045339	0.0159812
k119_472143	Streptomyces	Carbohydrates	D_ribose_utilization	Ribose_ABC_transport_system_permease_protein_RbsC_(TC_3.A.1.2.1)	3.10327	5.24122	0.00308872	0.0418864
k119_201277	Actinobacteria <phylum>	Carbohydrates	D_ribose_utilization	Ribose_ABC_transport_system_permease_protein_RbsC_(TC_3.A.1.2.1)	5.40226	4.84408	0.0025439	0.0381296
k119_7409	Streptomyces	Carbohydrates	D_ribose_utilization	Ribose_ABC_transport_system_permease_protein_RbsC_(TC_3.A.1.2.1)	3.37329	4.38793	0.00497768	0.0530077
k119_279671	Rubrobacter xylanophilus	Carbohydrates	D_ribose_utilization	Ribose_ABC_transport_system_permease_protein_RbsC_(TC_3.A.1.2.1)	3.28265	4.31868	0.00701543	0.0633197
k119_466177	Rubrobacter xylanophilus	Carbohydrates	D_ribose_utilization	Ribose_ABC_transport_system_permease_protein_RbsC_(TC_3.A.1.2.1)	3.78686	3.80593	0.00857662	0.0702306
k119_340708	Streptomyces	Carbohydrates	D_ribose_utilization	Ribose_ABC_transport_system_permease_protein_RbsC_(TC_3.A.1.2.1)	5.53725	3.64727	0.0021099	0.034856
k119_335717	Rubrobacter radiotolerans	Carbohydrates	D_Sorbitol(D_Glucitol)_and_L_Sorbose_Utilization	PTS_system_glucitol/sorbitol_specific_IIB_component_and_second_of_two_IIC_components_(EC_2.7.1.69)	2.30889	4.45415	0.0109938	0.0794423
k119_525928	Rubrobacter radiotolerans	Carbohydrates	D_Tagatose_and_Galactitol_Utilization	6_phosphofructokinase_(EC_2.7.1.11)	9.71191	4.0808	0.000168622	0.00917618
k119_561130	Rubrobacter radiotolerans	Carbohydrates	D_Tagatose_and_Galactitol_Utilization	6_phosphofructokinase_(EC_2.7.1.11)	3.71105	3.60055	0.00554048	0.0559836
k119_87695	Terrabacteria group	Carbohydrates	D_Tagatose_and_Galactitol_Utilization	D_tagatose_3_epimerase_(EC_5.3.1._)	3.98901	5.26508	0.00217958	0.0354356
k119_469112	Bacteria	Carbohydrates	D_Tagatose_and_Galactitol_Utilization	D_tagatose_3_epimerase_(EC_5.3.1._)	3.37956	4.96662	0.00962265	0.0743393
k119_169238	Rubrobacter	Carbohydrates	Deoxyribose_and_Deoxynucleoside_Catabolism	Deoxyribose_phosphate_aldolase_(EC_4.1.2.4)	2.6739	4.47073	0.00676871	0.0622615
k119_310998	Rubrobacter	Carbohydrates	Deoxyribose_and_Deoxynucleoside_Catabolism	Deoxyribose_phosphate_aldolase_(EC_4.1.2.4)	2.52449	4.21203	0.00823693	0.0687839
k119_308322	Rubrobacter	Carbohydrates	Deoxyribose_and_Deoxynucleoside_Catabolism	Phosphopentomutase_(EC_5.4.2.7)	4.05784	4.43843	0.0082445	0.0687839
k119_451992	Rubrobacter	Carbohydrates	Deoxyribose_and_Deoxynucleoside_Catabolism	Phosphopentomutase_(EC_5.4.2.7)	3.21462	3.71046	0.0136438	0.0894503
k119_322227	Rubrobacter	Carbohydrates	Deoxyribose_and_Deoxynucleoside_Catabolism	Purine_nucleoside_phosphorylase_(EC_2.4.2.1)	2.42851	4.34435	0.0157953	0.0967642
k119_5998	Rubrobacter	Carbohydrates	Deoxyribose_and_Deoxynucleoside_Catabolism	Putative_deoxyribose_specific_ABC_transporter_ATP_binding_protein	4.24844	4.73909	0.000697587	0.0200808
k119_451992	Rubrobacter	Carbohydrates	Deoxyribose_and_Deoxynucleoside_Catabolism	Pyrimidine_nucleoside_phosphorylase_(EC_2.4.2.2)	3.21462	3.71046	0.0136438	0.0894503
k119_397510	Rubrobacter	Carbohydrates	Dihydroxyacetone_kinases	Phosphoenolpyruvate_dihydroxyacetone_phosphotransferase_(EC_2.7.1.121)_dihydroxyacetone_binding_subunit_DhaK	3.22834	4.01386	0.0131612	0.0877185
k119_119597	Rubrobacter	Carbohydrates	Dihydroxyacetone_kinases	Phosphoenolpyruvate_dihydroxyacetone_phosphotransferase_(EC_2.7.1.121)_subunit_DhaM	3.41568	4.55589	0.00705425	0.0634993
k119_514642	Bacteria	Carbohydrates	EC_5.1.3.__Racemases_and_epimerases_acting_on_carbohydrates_and_derivatives	UDP_glucose_4_epimerase_(EC_5.1.3.2)	7.08847	6.54604	1.48066e-05	0.00189115
k119_189398	Bacteria	Carbohydrates	EC_5.1.3.__Racemases_and_epimerases_acting_on_carbohydrates_and_derivatives	UDP_glucose_4_epimerase_(EC_5.1.3.2)	2.54061	5.28547	0.00099355	0.0240862
k119_491531	unclassified Acidobacteria (miscellaneous)	Carbohydrates	EC_5.1.3.__Racemases_and_epimerases_acting_on_carbohydrates_and_derivatives	UDP_glucose_4_epimerase_(EC_5.1.3.2)	3.06139	4.64393	0.00371151	0.045738
k119_389324	Bacteria	Carbohydrates	EC_5.1.3.__Racemases_and_epimerases_acting_on_carbohydrates_and_derivatives	UDP_glucose_4_epimerase_(EC_5.1.3.2)	2.79327	4.04479	0.0116375	0.0820327
k119_4010	Terrabacteria group	Carbohydrates	EC_5.1.3.__Racemases_and_epimerases_acting_on_carbohydrates_and_derivatives	UDP_glucose_4_epimerase_(EC_5.1.3.2)	3.10987	3.93061	0.00544556	0.0554968
k119_134681	Bacteria	Carbohydrates	Entner_Doudoroff_Pathway	23_bisphosphoglycerate_independent_phosphoglycerate_mutase_(EC_5.4.2.1)	3.54059	5.49282	0.00672894	0.0621147
k119_413313	Rubrobacter	Carbohydrates	Entner_Doudoroff_Pathway	23_bisphosphoglycerate_independent_phosphoglycerate_mutase_archaeal_type_(EC_5.4.2.1)	6.8533	6.52658	3.86037e-05	0.00360175
k119_76553	Thaumarchaeota	Carbohydrates	Entner_Doudoroff_Pathway	23_bisphosphoglycerate_independent_phosphoglycerate_mutase_archaeal_type_(EC_5.4.2.1)	2.25944	4.85844	0.00557806	0.0561713
k119_77948	Bacteria	Carbohydrates	Entner_Doudoroff_Pathway	Aldehyde_dehydrogenase_(EC_1.2.1.3)	4.31399	5.80464	0.000465087	0.0161804
k119_396736	Rubrobacter radiotolerans	Carbohydrates	Entner_Doudoroff_Pathway	Aldehyde_dehydrogenase_(EC_1.2.1.3)	4.13057	5.30617	0.00169851	0.0311737
k119_249064	Rubrobacter	Carbohydrates	Entner_Doudoroff_Pathway	Aldehyde_dehydrogenase_(EC_1.2.1.3)	2.59236	5.11254	0.00379192	0.0463064
k119_268179	Bacteria	Carbohydrates	Entner_Doudoroff_Pathway	Aldehyde_dehydrogenase_(EC_1.2.1.3)	5.66435	4.51336	0.000610284	0.0186348
k119_159617	Bacteria	Carbohydrates	Entner_Doudoroff_Pathway	Aldehyde_dehydrogenase_(EC_1.2.1.3)	2.77757	4.10009	0.00430314	0.0493139
k119_364976	Rubrobacter	Carbohydrates	Entner_Doudoroff_Pathway	Enolase_(EC_4.2.1.11)	3.2695	4.48096	0.00638125	0.0602708
k119_45266	Rubrobacter	Carbohydrates	Entner_Doudoroff_Pathway	Enolase_(EC_4.2.1.11)	2.55995	4.20338	0.0109675	0.079314
k119_539580	Rubrobacter	Carbohydrates	Entner_Doudoroff_Pathway	Enolase_(EC_4.2.1.11)	8.07066	2.81256	0.00774917	0.0667853
k119_258515	unclassified Chloroflexi	Carbohydrates	Entner_Doudoroff_Pathway	Gluconate_dehydratase_(EC_4.2.1.39)	2.30009	4.26295	0.0101557	0.0764198
k119_588349	Rubrobacter	Carbohydrates	Entner_Doudoroff_Pathway	Glucose_6_phosphate_1_dehydrogenase_(EC_1.1.1.49)	2.34069	4.83288	0.00316928	0.0424413
k119_575446	Rubrobacter	Carbohydrates	Entner_Doudoroff_Pathway	Glucose_6_phosphate_1_dehydrogenase_(EC_1.1.1.49)	3.18115	4.1226	0.00354727	0.0448522
k119_6059	Rubrobacter	Carbohydrates	Entner_Doudoroff_Pathway	Glucose_6_phosphate_1_dehydrogenase_(EC_1.1.1.49)	3.89432	3.43456	0.0131758	0.0877426
k119_52492	Rubrobacter	Carbohydrates	Entner_Doudoroff_Pathway	Pyruvate_kinase_(EC_2.7.1.40)	2.59792	4.66642	0.00602406	0.0584861
k119_99531	Rubrobacter	Carbohydrates	Entner_Doudoroff_Pathway	Pyruvate_kinase_(EC_2.7.1.40)	4.34154	3.1993	0.0139879	0.0907242
k119_475500	Rubrobacter	Carbohydrates	Entner_Doudoroff_Pathway	Pyruvate_kinase_(EC_2.7.1.40)	7.2204	2.88425	0.00442782	0.0501149
k119_375671	Actinobacteria <phylum>	Carbohydrates	Ethanolamine_utilization	Ethanolamine_permease	4.01316	3.30232	0.0117024	0.0822695
k119_56920	Bacteria	Carbohydrates	Ethylmalonyl_CoA_pathway_of_C2_assimilation	Malate_synthase_(EC_2.3.3.9)	4.6786	4.86469	0.00214646	0.0351453
k119_116005	Rubrobacter	Carbohydrates	Ethylmalonyl_CoA_pathway_of_C2_assimilation	Malate_synthase_(EC_2.3.3.9)	3.13429	4.85195	0.00816272	0.0685505
k119_277173	Bacteria	Carbohydrates	Ethylmalonyl_CoA_pathway_of_C2_assimilation	Malate_synthase_(EC_2.3.3.9)	3.19282	4.82956	0.00080884	0.0216895
k119_138601	Rubrobacter xylanophilus	Carbohydrates	Ethylmalonyl_CoA_pathway_of_C2_assimilation	Malate_synthase_(EC_2.3.3.9)	3.34634	4.55079	0.00646023	0.0606803
k119_269412	Bacteria	Carbohydrates	Ethylmalonyl_CoA_pathway_of_C2_assimilation	Malate_synthase_(EC_2.3.3.9)	2.33131	4.39847	0.0118919	0.083041
k119_206516	Rubrobacter	Carbohydrates	Ethylmalonyl_CoA_pathway_of_C2_assimilation	Malate_synthase_(EC_2.3.3.9)	9.35341	4.22672	0.000539134	0.0173717
k119_141814	Rubrobacter	Carbohydrates	Ethylmalonyl_CoA_pathway_of_C2_assimilation	Malate_synthase_(EC_2.3.3.9)	2.55551	4.15639	0.0164992	0.099178
k119_253634	Rubrobacter	Carbohydrates	Ethylmalonyl_CoA_pathway_of_C2_assimilation	Malate_synthase_(EC_2.3.3.9)	6.11681	3.54358	0.0114971	0.081524
k119_562545	Rubrobacter	Carbohydrates	Ethylmalonyl_CoA_pathway_of_C2_assimilation	Malate_synthase_(EC_2.3.3.9)	6.30617	3.46084	0.00541748	0.0553662
k119_322739	Rubrobacter	Carbohydrates	Ethylmalonyl_CoA_pathway_of_C2_assimilation	Malate_synthase_(EC_2.3.3.9)	7.89049	3.35751	0.0048528	0.0523908
k119_301899	Rubrobacter	Carbohydrates	Ethylmalonyl_CoA_pathway_of_C2_assimilation	Malate_synthase_(EC_2.3.3.9)	4.8121	2.99284	0.0117707	0.0825565
k119_478222	Terrabacteria group	Carbohydrates	Ethylmalonyl_CoA_pathway_of_C2_assimilation	Malate_synthase_(EC_2.3.3.9)	10.1799	2.92189	0.0115796	0.08187
k119_111199	Nocardioidaceae	Carbohydrates	Fermentations_in_Streptococci	NAD(P)_transhydrogenase_alpha_subunit_(EC_1.6.1.2)	2.83847	4.96125	0.0124259	0.0849522
k119_413239	Rubrobacter	Carbohydrates	Fermentations_in_Streptococci	NAD(P)_transhydrogenase_alpha_subunit_(EC_1.6.1.2)	3.33052	4.93847	0.000770632	0.0211529
k119_266966	Rubrobacter	Carbohydrates	Fermentations_in_Streptococci	NAD(P)_transhydrogenase_alpha_subunit_(EC_1.6.1.2)	3.23199	3.70158	0.0125358	0.0853828
k119_399968	Rubrobacter	Carbohydrates	Fermentations_in_Streptococci	NAD(P)_transhydrogenase_alpha_subunit_(EC_1.6.1.2)	3.71786	3.7014	0.0157474	0.0965838
k119_146099	Rubrobacter	Carbohydrates	Fermentations_in_Streptococci	NAD(P)_transhydrogenase_alpha_subunit_(EC_1.6.1.2)	4.80427	3.61708	0.00320099	0.0426188
k119_388194	Rubrobacter	Carbohydrates	Fermentations_in_Streptococci	NAD(P)_transhydrogenase_subunit_beta_(EC_1.6.1.2)	2.18847	4.89027	0.00354276	0.0448147
k119_238339	Rubrobacter aplysinae	Carbohydrates	Fermentations_in_Streptococci	NAD(P)_transhydrogenase_subunit_beta_(EC_1.6.1.2)	3.17212	4.3047	0.00736664	0.0650514
k119_146099	Rubrobacter	Carbohydrates	Fermentations_in_Streptococci	NAD(P)_transhydrogenase_subunit_beta_(EC_1.6.1.2)	4.80427	3.61708	0.00320099	0.0426188
k119_378754	Proteobacteria	Carbohydrates	Fermentations_in_Streptococci	Pyruvate_oxidase_(EC_1.2.3.3)	3.60735	5.50118	0.000501477	0.0166619
k119_586836	Bacteria	Carbohydrates	Fermentations_in_Streptococci	Pyruvate_oxidase_(EC_1.2.3.3)	5.00847	4.13808	0.0108018	0.0786936
k119_112578	Nitrososphaeraceae	Carbohydrates	Fermentations_in_Streptococci	Pyruvate_oxidase_[ubiquinone_cytochrome]_(EC_1.2.2.2)	3.24217	4.40894	0.00579792	0.0573536
k119_370253	Actinobacteria <phylum>	Carbohydrates	Folate_mediated_one_carbon_metabolism_in_plants	Dihydrofolate_reductase_(EC_1.5.1.3)	8.2892	6.71867	1.37896e-05	0.00181706
k119_267803	Bacillales	Carbohydrates	Folate_mediated_one_carbon_metabolism_in_plants	Dihydrofolate_reductase_(EC_1.5.1.3)	5.51912	6.0163	0.000602193	0.0185226
k119_520101	Bacteria candidate phyla	Carbohydrates	Folate_mediated_one_carbon_metabolism_in_plants	Dihydrofolate_reductase_(EC_1.5.1.3)	4.74829	5.74952	0.0027598	0.0395295
k119_31430	Actinobacteria	Carbohydrates	Folate_mediated_one_carbon_metabolism_in_plants	Dihydrofolate_reductase_(EC_1.5.1.3)	4.13634	5.57896	0.000546769	0.0174829
k119_186580	Bacteria	Carbohydrates	Folate_mediated_one_carbon_metabolism_in_plants	Dihydrofolate_reductase_(EC_1.5.1.3)	3.86309	5.55527	0.000661265	0.0193801
k119_401048	Bacteria	Carbohydrates	Folate_mediated_one_carbon_metabolism_in_plants	Dihydrofolate_reductase_(EC_1.5.1.3)	6.27029	5.3305	0.00277983	0.0396397
k119_454897	Bacteria	Carbohydrates	Folate_mediated_one_carbon_metabolism_in_plants	Dihydrofolate_reductase_(EC_1.5.1.3)	4.84417	5.32963	0.0019329	0.0334023
k119_14301	Chloroflexi	Carbohydrates	Folate_mediated_one_carbon_metabolism_in_plants	Dihydrofolate_reductase_(EC_1.5.1.3)	9.40174	5.21467	0.000111552	0.00713061
k119_414618	Actinobacteria	Carbohydrates	Folate_mediated_one_carbon_metabolism_in_plants	Dihydrofolate_reductase_(EC_1.5.1.3)	2.46473	5.19879	0.00209922	0.0348407
k119_530404	cellular organisms	Carbohydrates	Folate_mediated_one_carbon_metabolism_in_plants	Dihydrofolate_reductase_(EC_1.5.1.3)	2.97611	5.12955	0.00466916	0.0514192
k119_499002	cellular organisms	Carbohydrates	Folate_mediated_one_carbon_metabolism_in_plants	Dihydrofolate_reductase_(EC_1.5.1.3)	3.22577	5.11152	0.00358561	0.0450872
k119_136786	Bacteria	Carbohydrates	Folate_mediated_one_carbon_metabolism_in_plants	Dihydrofolate_reductase_(EC_1.5.1.3)	5.65575	4.94448	0.00171537	0.0313363
k119_423316	Streptosporangiales	Carbohydrates	Folate_mediated_one_carbon_metabolism_in_plants	Dihydrofolate_reductase_(EC_1.5.1.3)	4.63143	4.72963	0.00414092	0.0484679
k119_492427	Terrabacteria group	Carbohydrates	Folate_mediated_one_carbon_metabolism_in_plants	Dihydrofolate_reductase_(EC_1.5.1.3)	2.22524	4.71517	0.00953905	0.0740419
k119_23906	Cyanobacteria	Carbohydrates	Folate_mediated_one_carbon_metabolism_in_plants	Dihydrofolate_reductase_(EC_1.5.1.3)	2.70705	4.70505	0.00452069	0.0506148
k119_70698	Terrabacteria group	Carbohydrates	Folate_mediated_one_carbon_metabolism_in_plants	Dihydrofolate_reductase_(EC_1.5.1.3)	2.83238	4.68596	0.0103855	0.0772603
k119_351684	Bacteria	Carbohydrates	Folate_mediated_one_carbon_metabolism_in_plants	Dihydrofolate_reductase_(EC_1.5.1.3)	6.893	4.66222	0.00205405	0.034437
k119_275558	Streptosporangiales	Carbohydrates	Folate_mediated_one_carbon_metabolism_in_plants	Dihydrofolate_reductase_(EC_1.5.1.3)	2.28529	4.60893	0.0121959	0.0840206
k119_228021	Terrabacteria group	Carbohydrates	Folate_mediated_one_carbon_metabolism_in_plants	Dihydrofolate_reductase_(EC_1.5.1.3)	6.41915	4.28794	0.000280054	0.0122815
k119_536543	Streptosporangiales	Carbohydrates	Folate_mediated_one_carbon_metabolism_in_plants	Dihydrofolate_reductase_(EC_1.5.1.3)	3.24387	3.97275	0.00958102	0.0741541
k119_457101	Nocardioidaceae	Carbohydrates	Folate_mediated_one_carbon_metabolism_in_plants	Dihydrofolate_reductase_(EC_1.5.1.3)	3.81599	3.95739	0.00722452	0.0643554
k119_216134	Actinobacteria <phylum>	Carbohydrates	Folate_mediated_one_carbon_metabolism_in_plants	Dihydrofolate_reductase_(EC_1.5.1.3)	3.81194	3.83924	0.00539076	0.0552464
k119_235594	Bacteria	Carbohydrates	Folate_mediated_one_carbon_metabolism_in_plants	Dihydrofolate_reductase_(EC_1.5.1.3)	11.1518	3.49212	0.00264813	0.0387864
k119_451648	Bacteria	Carbohydrates	Folate_mediated_one_carbon_metabolism_in_plants	Formate__tetrahydrofolate_ligase_(EC_6.3.4.3)	3.21986	5.19352	0.00105682	0.0246949
k119_35291	Actinobacteria <phylum>	Carbohydrates	Folate_mediated_one_carbon_metabolism_in_plants	Formate__tetrahydrofolate_ligase_(EC_6.3.4.3)	2.99095	4.80985	0.00278717	0.0397052
k119_336744	Actinobacteria <phylum>	Carbohydrates	Folate_mediated_one_carbon_metabolism_in_plants	Formate__tetrahydrofolate_ligase_(EC_6.3.4.3)	2.98301	3.72113	0.0165051	0.0992054
k119_235274	Actinobacteria	Carbohydrates	Formaldehyde_assimilation:_Ribulose_monophosphate_pathway	Glucosamine__fructose_6_phosphate_aminotransferase_[isomerizing]_(EC_2.6.1.16)	2.94686	4.97044	0.0142319	0.091538
k119_70976	Thaumarchaeota	Carbohydrates	Formaldehyde_assimilation:_Ribulose_monophosphate_pathway	Glucosamine__fructose_6_phosphate_aminotransferase_[isomerizing]_(EC_2.6.1.16)	5.03614	4.56794	0.00189852	0.033012
k119_577871	Thaumarchaeota	Carbohydrates	Formaldehyde_assimilation:_Ribulose_monophosphate_pathway	Glucosamine__fructose_6_phosphate_aminotransferase_[isomerizing]_(EC_2.6.1.16)	5.47832	4.38266	0.00246499	0.0374789
k119_299983	Rubrobacter	Carbohydrates	Formaldehyde_assimilation:_Ribulose_monophosphate_pathway	Glucosamine__fructose_6_phosphate_aminotransferase_[isomerizing]_(EC_2.6.1.16)	9.93926	3.62536	0.00100594	0.0241734
k119_262351	Rubrobacter xylanophilus	Carbohydrates	Formaldehyde_assimilation:_Ribulose_monophosphate_pathway	Glucose_6_phosphate_isomerase_(EC_5.3.1.9)	4.0476	5.04684	0.00121959	0.0264663
k119_473909	Rubrobacter xylanophilus	Carbohydrates	Formaldehyde_assimilation:_Ribulose_monophosphate_pathway	Glucose_6_phosphate_isomerase_(EC_5.3.1.9)	2.22995	4.97683	0.0027029	0.0391624
k119_189487	Planctomycetes	Carbohydrates	Fructooligosaccharides(FOS)_and_Raffinose_Utilization	Alpha_galactosidase_(EC_3.2.1.22)	2.87071	4.0728	0.0117231	0.0823526
k119_356481	Bacteria	Carbohydrates	Fructooligosaccharides(FOS)_and_Raffinose_Utilization	Alpha_galactosidase_(EC_3.2.1.22)	3.67757	3.88379	0.010456	0.0775259
k119_454680	Rubrobacter	Carbohydrates	Fructooligosaccharides(FOS)_and_Raffinose_Utilization	Multiple_sugar_ABC_transporter_ATP_binding_protein	3.42489	4.70442	0.00128639	0.0271302
k119_279066	Rubrobacter	Carbohydrates	Fructooligosaccharides(FOS)_and_Raffinose_Utilization	Multiple_sugar_ABC_transporter_ATP_binding_protein	2.61385	4.66556	0.00771314	0.0666069
k119_57779	Rubrobacter	Carbohydrates	Fructooligosaccharides(FOS)_and_Raffinose_Utilization	Multiple_sugar_ABC_transporter_ATP_binding_protein	2.62587	4.06501	0.0100079	0.0758177
k119_370796	Rubrobacter	Carbohydrates	Fructooligosaccharides(FOS)_and_Raffinose_Utilization	Multiple_sugar_ABC_transporter_ATP_binding_protein	5.57794	3.22089	0.00819666	0.0686456
k119_264347	Actinobacteria	Carbohydrates	Fructooligosaccharides(FOS)_and_Raffinose_Utilization	Multiple_sugar_ABC_transporter_substrate_binding_protein	5.69545	5.78934	0.00115038	0.0258044
k119_69268	Rubrobacter xylanophilus	Carbohydrates	Fructose_utilization	1_phosphofructokinase_(EC_2.7.1.56)	2.58491	4.48132	0.0104961	0.0776723
k119_77020	Bacteria	Carbohydrates	Fructose_utilization	Fructose_ABC_transporter_ATP_binding_component_FrcA	5.30079	4.9141	0.000306809	0.0129922
k119_380487	Terrabacteria group	Carbohydrates	Fructose_utilization	Fructose_ABC_transporter_ATP_binding_component_FrcA	3.3826	4.73404	0.00577014	0.0571859
k119_265430	Bacteria	Carbohydrates	Fructose_utilization	Fructose_ABC_transporter_ATP_binding_component_FrcA	4.91176	4.14915	0.00292477	0.0406435
k119_154133	Rubrobacter	Carbohydrates	Fructose_utilization	Phosphoenolpyruvate_protein_phosphotransferase_of_PTS_system_(EC_2.7.3.9)	6.58515	3.87678	0.00105225	0.0246569
k119_43057	Terrabacteria group	Carbohydrates	Fructose_utilization	Transcriptional_repressor_of_the_fructose_operon_DeoR_family	8.03256	5.17007	3.7512e-05	0.00352661
k119_159279	Rubrobacter	Carbohydrates	Galactose_degradation_in_plants	Beta_phosphoglucomutase_(EC_5.4.2.6)	3.6016	4.17916	0.00445756	0.0502881
k119_122199	Rubrobacter xylanophilus	Carbohydrates	Galactose_degradation_in_plants	Beta_phosphoglucomutase_(EC_5.4.2.6)	3.72297	3.82485	0.013514	0.0889943
k119_414707	Thaumarchaeota	Carbohydrates	Galactose_degradation_in_plants	Galactose_1_phosphate_uridylyltransferase_(EC_2.7.7.10)	2.89871	5.11678	0.00230208	0.0364964
k119_542492	Rubrobacter xylanophilus	Carbohydrates	Galactose_degradation_in_plants	UDP_glucose_dehydrogenase_(EC_1.1.1.22)	2.62488	4.97891	0.00429096	0.0492789
k119_62639	Rubrobacter	Carbohydrates	Galactose_degradation_in_plants	UDP_glucose_dehydrogenase_(EC_1.1.1.22)	4.21182	3.46005	0.00368262	0.0456448
k119_97551	Rubrobacter	Carbohydrates	Glycerate_metabolism	Glyoxylate_carboligase_(EC_4.1.1.47)	4.70363	5.25482	0.00147724	0.0292068
k119_546725	Rubrobacter	Carbohydrates	Glycerate_metabolism	Glyoxylate_carboligase_(EC_4.1.1.47)	4.2677	3.83839	0.00341537	0.0440215
k119_428005	Rubrobacter	Carbohydrates	Glycerate_metabolism	Glyoxylate_carboligase_(EC_4.1.1.47)	3.69971	3.75157	0.00611062	0.0589321
k119_379128	Rubrobacter	Carbohydrates	Glycerate_metabolism	Glyoxylate_carboligase_(EC_4.1.1.47)	4.63367	3.44702	0.0106622	0.0781847
k119_186475	Actinobacteria	Carbohydrates	Glycerol_and_Glycerol_3_phosphate_Uptake_and_Utilization	Glycerol_3_phosphate_ABC_transporter_ATP_binding_protein_UgpC_(TC_3.A.1.1.3)	4.53381	3.45254	0.00767649	0.0664115
k119_528704	Actinobacteria <phylum>	Carbohydrates	Glycerol_and_Glycerol_3_phosphate_Uptake_and_Utilization	Glycerol_3_phosphate_dehydrogenase_(EC_1.1.5.3)	7.29124	4.92808	9.00513e-05	0.00624813
k119_224759	Rubrobacter radiotolerans	Carbohydrates	Glycerol_and_Glycerol_3_phosphate_Uptake_and_Utilization	Glycerol_kinase_(EC_2.7.1.30)	4.12791	4.6607	0.00304603	0.0415896
k119_539376	Bacteria	Carbohydrates	Glycerol_and_Glycerol_3_phosphate_Uptake_and_Utilization	Glycerol_kinase_(EC_2.7.1.30)	3.03697	4.09434	0.0162347	0.0982663
k119_383723	Rubrobacter radiotolerans	Carbohydrates	Glycerol_and_Glycerol_3_phosphate_Uptake_and_Utilization	Glycerol_kinase_(EC_2.7.1.30)	6.37818	3.57042	0.00160575	0.0303233
k119_503665	Rubrobacter	Carbohydrates	Glycerol_and_Glycerol_3_phosphate_Uptake_and_Utilization	Glycerol_kinase_(EC_2.7.1.30)	5.57556	3.38692	0.00505886	0.0535027
k119_163880	Terrabacteria group	Carbohydrates	Glycerol_and_Glycerol_3_phosphate_Uptake_and_Utilization	Glycerol_uptake_facilitator_protein	3.46572	3.69443	0.0108961	0.0790146
k119_70330	Actinobacteria <phylum>	Carbohydrates	Glycerol_and_Glycerol_3_phosphate_Uptake_and_Utilization	Glycerophosphoryl_diester_phosphodiesterase_(EC_3.1.4.46)	4.09008	4.18635	0.0149073	0.0937576
k119_33474	Rubrobacter xylanophilus	Carbohydrates	Glycerol_and_Glycerol_3_phosphate_Uptake_and_Utilization	Glycerophosphoryl_diester_phosphodiesterase_periplasmic_(EC_3.1.4.46)	3.32047	5.20762	0.00158625	0.030135
k119_86477	Rubrobacter	Carbohydrates	Glycerol_fermentation_to_13_propanediol	Cob(I)alamin_adenosyltransferase_(EC_2.5.1.17)	4.4423	3.57551	0.00954942	0.0740946
k119_151839	Actinobacteria	Carbohydrates	Glycogen_metabolism	Glycogen_debranching_enzyme_(EC_3.2.1._)	11.8096	3.16831	0.00209419	0.0347848
k119_563263	Terrabacteria group	Carbohydrates	Glycolate_glyoxylate_interconversions	D_Lactate_dehydrogenase_cytochrome_c_dependent_(EC_1.1.2.4)	3.399	5.41543	0.000334692	0.0135368
k119_456997	Rubrobacter	Carbohydrates	Glycolate_glyoxylate_interconversions	Glycolate_dehydrogenase_(EC_1.1.99.14)_iron_sulfur_subunit_GlcF	3.15982	3.77565	0.00721316	0.0643122
k119_419942	Rubrobacter	Carbohydrates	Glycolate_glyoxylate_interconversions	Glycolate_dehydrogenase_(EC_1.1.99.14)_iron_sulfur_subunit_GlcF	2.39571	3.69114	0.0145616	0.0925765
k119_572701	Actinobacteria <phylum>	Carbohydrates	Glycolate_glyoxylate_interconversions	Glycolate_dehydrogenase_(EC_1.1.99.14)_iron_sulfur_subunit_GlcF	5.92075	2.91466	0.0144612	0.092269
k119_136	Rubrobacter	Carbohydrates	Glycolate_glyoxylate_interconversions	Glycolate_dehydrogenase_(EC_1.1.99.14)_subunit_GlcD	2.35979	4.34233	0.0100884	0.0761616
k119_317415	Terrabacteria group	Carbohydrates	Glycolate_glyoxylate_interconversions	Glycolate_dehydrogenase_(EC_1.1.99.14)_subunit_GlcD	7.35435	3.43785	0.0024598	0.0374789
k119_286731	Candidatus Nitrososphaera gargensis Ga9.2	Carbohydrates	Glycolate_glyoxylate_interconversions	Glyoxylate_reductase_(EC_1.1.1.26)	3.22878	5.06948	0.00754244	0.0658251
k119_530280	Bacteria	Carbohydrates	Glycolysis_and_Gluconeogenesis	Phosphoenolpyruvate_synthase_(EC_2.7.9.2)	8.36724	6.74644	5.46395e-06	0.00091971
k119_433970	Nitrolancea hollandica	Carbohydrates	Glycolysis_and_Gluconeogenesis	Phosphoenolpyruvate_synthase_(EC_2.7.9.2)	6.56506	5.20444	0.000117762	0.0073372
k119_21893	Bacteria	Carbohydrates	Glycolysis_and_Gluconeogenesis	Phosphoenolpyruvate_synthase_(EC_2.7.9.2)	2.19202	5.15446	0.00245791	0.0374789
k119_281441	Bacteria	Carbohydrates	Glycolysis_and_Gluconeogenesis	Phosphoenolpyruvate_synthase_(EC_2.7.9.2)	3.42458	4.62842	0.00524576	0.0545017
k119_52997	Bacteria	Carbohydrates	Glycolysis_and_Gluconeogenesis	Phosphoenolpyruvate_synthase_(EC_2.7.9.2)	3.92	3.77035	0.00763818	0.0662524
k119_287785	Terrabacteria group	Carbohydrates	Glycolysis_and_Gluconeogenesis	Pyruvate_utilizing_enzyme_similar_to_phosphoenolpyruvate_synthase	3.19453	5.01554	0.00308874	0.0418864
k119_135974	Bacillales	Carbohydrates	Glyoxylate_bypass	(R)_2_hydroxyacid_dehydrogenase_similar_to_L_sulfolactate_dehydrogenase_(EC_1.1.1.272)	4.26128	5.39818	0.00339176	0.0439163
k119_498440	Alphaproteobacteria	Carbohydrates	Inositol_catabolism	5_deoxy_glucuronate_isomerase_(EC_5.3.1._)	6.48675	4.56785	0.000657745	0.0193485
k119_2075	Rubrobacter xylanophilus	Carbohydrates	Inositol_catabolism	5_keto_2_deoxygluconokinase_(EC_2.7.1.92)	2.43383	5.13154	0.00167997	0.0310091
k119_296896	Terrabacteria group	Carbohydrates	Inositol_catabolism	Epi_inositol_hydrolase_(EC_3.7.1._)	4.3264	3.86243	0.0138341	0.0901458
k119_399180	Terrabacteria group	Carbohydrates	Inositol_catabolism	Inositol_transport_system_permease_protein	4.68027	4.90126	0.00111144	0.025325
k119_242542	Rubrobacter xylanophilus	Carbohydrates	Inositol_catabolism	Inositol_transport_system_permease_protein	2.17507	4.77559	0.0127967	0.0863957
k119_148312	Bacteria	Carbohydrates	Inositol_catabolism	Inositol_transport_system_sugar_binding_protein	2.1613	4.30047	0.00657626	0.0613104
k119_397528	Bacteria	Carbohydrates	Inositol_catabolism	Inositol_transport_system_sugar_binding_protein	3.13993	4.08256	0.0142393	0.0915669
k119_301787	Bacteria	Carbohydrates	Inositol_catabolism	Inositol_transport_system_sugar_binding_protein	2.7304	3.87876	0.0114949	0.0815168
k119_157566	Bacteria	Carbohydrates	Inositol_catabolism	Inosose_isomerase_(EC_5.3.99._)	3.78262	3.15991	0.0133814	0.0885024
k119_418881	Bacillales	Carbohydrates	Inositol_catabolism	Major_myo_inositol_transporter_IolT	3.02002	4.95627	0.0119906	0.0833989
k119_308334	Bacteria	Carbohydrates	Inositol_catabolism	Major_myo_inositol_transporter_IolT	2.73017	4.77748	0.00832337	0.0690289
k119_552027	Bacillales	Carbohydrates	Inositol_catabolism	Major_myo_inositol_transporter_IolT	3.29646	4.29152	0.0120164	0.0835
k119_148364	Rubrobacter	Carbohydrates	Inositol_catabolism	Methylmalonate_semialdehyde_dehydrogenase_[inositol]_(EC_1.2.1.27)	4.64339	5.65188	0.00022112	0.010803
k119_404240	Actinobacteria <phylum>	Carbohydrates	Inositol_catabolism	Methylmalonate_semialdehyde_dehydrogenase_[inositol]_(EC_1.2.1.27)	2.68743	5.09071	0.0020271	0.0342457
k119_251584	Rubrobacter	Carbohydrates	Inositol_catabolism	Methylmalonate_semialdehyde_dehydrogenase_[inositol]_(EC_1.2.1.27)	2.7522	4.29338	0.0120262	0.0835445
k119_233509	Actinobacteria <phylum>	Carbohydrates	Inositol_catabolism	Methylmalonate_semialdehyde_dehydrogenase_[inositol]_(EC_1.2.1.27)	2.65013	3.77175	0.0129488	0.0868907
k119_277019	Rubrobacter	Carbohydrates	Inositol_catabolism	Methylmalonate_semialdehyde_dehydrogenase_[inositol]_(EC_1.2.1.27)	7.17632	2.90283	0.00804229	0.0680167
k119_209469	Rubrobacter	Carbohydrates	L_Arabinose_utilization	Arabinose_operon_protein_AraL	2.60166	4.52499	0.0074683	0.0654486
k119_519768	Rubrobacter xylanophilus	Carbohydrates	L_fucose_utilization	L_fuculose_phosphate_aldolase_(EC_4.1.2.17)	2.30779	4.41769	0.0156268	0.0962345
k119_547640	Bacteria	Carbohydrates	L_fucose_utilization_temp	L_fuconate_dehydratase_(EC_4.2.1.68)	2.3538	4.64738	0.00429723	0.0493047
k119_503902	Actinobacteria	Carbohydrates	L_rhamnose_utilization	Aldehyde_dehydrogenase_A_(EC_1.2.1.22)	2.26434	4.45901	0.0125076	0.0852795
k119_377243	Terrabacteria group	Carbohydrates	L_rhamnose_utilization	L_rhamnose_isomerase_(EC_5.3.1.14)	2.91161	4.87226	0.00300703	0.0412937
k119_150567	Rubrobacter xylanophilus	Carbohydrates	L_rhamnose_utilization	Predicted_L_lactate_dehydrogenase_Iron_sulfur_cluster_binding_subunit_YkgF	3.86595	3.46178	0.00726511	0.0645725
k119_159029	Rubrobacter xylanophilus	Carbohydrates	L_rhamnose_utilization	Predicted_L_lactate_dehydrogenase_Iron_sulfur_cluster_binding_subunit_YkgF	6.62062	3.40658	0.000613021	0.0186891
k119_367400	Bacteria	Carbohydrates	L_rhamnose_utilization	Predicted_L_lactate_dehydrogenase_Iron_sulfur_cluster_binding_subunit_YkgF	3.8735	3.39942	0.0103718	0.0771843
k119_47369	Rubrobacter xylanophilus	Carbohydrates	L_rhamnose_utilization	Predicted_L_rhamnose_ABC_transporter_ATP_binding_component	3.81235	3.96536	0.00732239	0.0648386
k119_529245	Rubrobacter xylanophilus	Carbohydrates	L_rhamnose_utilization	Predicted_L_rhamnose_ABC_transporter_substrate_binding_component	2.6864	4.85291	0.00224261	0.0359709
k119_97691	Rubrobacter xylanophilus	Carbohydrates	L_rhamnose_utilization	Predicted_L_rhamnose_ABC_transporter_substrate_binding_component	2.23349	4.75197	0.00227333	0.0361853
k119_147631	Rubrobacter xylanophilus	Carbohydrates	L_rhamnose_utilization	Predicted_L_rhamnose_ABC_transporter_substrate_binding_component	3.50089	3.49309	0.00919512	0.0726389
k119_67775	Rubrobacter xylanophilus	Carbohydrates	L_rhamnose_utilization	Predicted_L_rhamnose_ABC_transporter_transmembrane_component_1	2.5113	5.08383	0.00527378	0.0546182
k119_529245	Rubrobacter xylanophilus	Carbohydrates	L_rhamnose_utilization	Predicted_L_rhamnose_ABC_transporter_transmembrane_component_1	2.6864	4.85291	0.00224261	0.0359709
k119_286011	Rubrobacter xylanophilus	Carbohydrates	L_rhamnose_utilization	Predicted_L_rhamnose_ABC_transporter_transmembrane_component_1	4.03314	4.59187	0.00222192	0.0358461
k119_147631	Rubrobacter xylanophilus	Carbohydrates	L_rhamnose_utilization	Predicted_L_rhamnose_ABC_transporter_transmembrane_component_1	3.50089	3.49309	0.00919512	0.0726389
k119_67775	Rubrobacter xylanophilus	Carbohydrates	L_rhamnose_utilization	Predicted_L_rhamnose_ABC_transporter_transmembrane_component_2	2.5113	5.08383	0.00527378	0.0546182
k119_468514	Bacteria	Carbohydrates	L_rhamnose_utilization	Predicted_rhamnose_oligosaccharide_ABC_transporter_substrate_binding_component	3.31654	3.59115	0.015324	0.0952118
k119_435731	Bacteria	Carbohydrates	L_rhamnose_utilization	Rhamnulokinase_(EC_2.7.1.5)	2.63242	4.48805	0.0158599	0.097048
k119_47369	Rubrobacter xylanophilus	Carbohydrates	L_rhamnose_utilization	Rhamnulokinase_(EC_2.7.1.5)	3.81235	3.96536	0.00732239	0.0648386
k119_87695	Terrabacteria group	Carbohydrates	L_rhamnose_utilization	Transcriptional_regulator_of_rhamnose_utilization_DeoR_family	3.98901	5.26508	0.00217958	0.0354356
k119_470431	Bacteria	Carbohydrates	Lactate_utilization	L_lactate_permease	7.23433	4.43376	0.00245375	0.0374789
k119_520345	Bacteria	Carbohydrates	Lactate_utilization	L_lactate_permease	4.77191	4.10095	0.0167124	0.0999523
k119_229906	Rubrobacter xylanophilus	Carbohydrates	Lactate_utilization	Predicted_L_lactate_dehydrogenase_Fe_S_oxidoreductase_subunit_YkgE	3.56239	5.09315	0.00181209	0.0322269
k119_130529	Rubrobacter xylanophilus	Carbohydrates	Lactate_utilization	Predicted_L_lactate_dehydrogenase_Fe_S_oxidoreductase_subunit_YkgE	4.89134	4.61309	0.000257312	0.0116649
k119_89446	Rubrobacter xylanophilus	Carbohydrates	Lactate_utilization	Predicted_L_lactate_dehydrogenase_Fe_S_oxidoreductase_subunit_YkgE	2.11091	4.30238	0.0078741	0.0672285
k119_150567	Rubrobacter xylanophilus	Carbohydrates	Lactate_utilization	Predicted_L_lactate_dehydrogenase_hypothetical_protein_subunit_YkgG	3.86595	3.46178	0.00726511	0.0645725
k119_519204	Actinobacteria <phylum>	Carbohydrates	Lactate_utilization_temp	Succinate_semialdehyde_dehydrogenase_[NADP+]_(EC_1.2.1.79)	4.13051	4.43717	0.0067929	0.0623391
k119_382009	Candidatus Nitrososphaera gargensis Ga9.2	Carbohydrates	Lactate_utilization_temp	Succinate_semialdehyde_dehydrogenase_[NADP+]_(EC_1.2.1.79)	2.72459	4.36902	0.0143602	0.0919941
k119_365749	Actinobacteria <phylum>	Carbohydrates	Lactate_utilization_temp	Succinate_semialdehyde_dehydrogenase_[NADP+]_(EC_1.2.1.79)	4.3418	3.60468	0.00728566	0.0646608
k119_233479	Bacteria	Carbohydrates	Maltose_and_Maltodextrin_Utilization	Glucoamylase_(EC_3.2.1.3)	5.18236	5.69981	0.00225772	0.0360796
k119_190799	Rubrobacter	Carbohydrates	Maltose_and_Maltodextrin_Utilization	Glucoamylase_(EC_3.2.1.3)	4.1079	5.45194	0.000241773	0.0112221
k119_34595	Bacteria	Carbohydrates	Maltose_and_Maltodextrin_Utilization	Glucoamylase_(EC_3.2.1.3)	2.98703	5.3931	0.00251518	0.0378758
k119_354139	Bacteria	Carbohydrates	Maltose_and_Maltodextrin_Utilization	Glucoamylase_(EC_3.2.1.3)	7.30508	5.04937	0.000409693	0.0150392
k119_486037	Streptomycetaceae	Carbohydrates	Maltose_and_Maltodextrin_Utilization	Glucoamylase_(EC_3.2.1.3)	3.34573	4.85145	0.00650038	0.0608471
k119_168002	Bacteria	Carbohydrates	Maltose_and_Maltodextrin_Utilization	Glucoamylase_(EC_3.2.1.3)	4.89499	4.82264	0.00139685	0.028355
k119_14345	Rubrobacter	Carbohydrates	Maltose_and_Maltodextrin_Utilization	Glucoamylase_(EC_3.2.1.3)	2.27522	4.7933	0.00513786	0.0539438
k119_116333	Rubrobacter	Carbohydrates	Maltose_and_Maltodextrin_Utilization	Glucoamylase_(EC_3.2.1.3)	4.41187	4.64896	0.0035263	0.0447507
k119_440590	Bacteria	Carbohydrates	Maltose_and_Maltodextrin_Utilization	Glucoamylase_(EC_3.2.1.3)	4.6863	4.37418	0.0021912	0.0355397
k119_479621	Actinobacteria	Carbohydrates	Maltose_and_Maltodextrin_Utilization	Glucoamylase_(EC_3.2.1.3)	3.24134	3.99567	0.00673554	0.0621395
k119_354488	Rubrobacter	Carbohydrates	Maltose_and_Maltodextrin_Utilization	Glucoamylase_(EC_3.2.1.3)	3.28869	3.76189	0.0131826	0.0877426
k119_234077	PVC group	Carbohydrates	Maltose_and_Maltodextrin_Utilization	Maltose_operon_transcriptional_repressor_MalR_LacI_family	2.65541	3.75007	0.0129283	0.0868519
k119_181872	Rubrobacter xylanophilus	Carbohydrates	Maltose_and_Maltodextrin_Utilization	Maltose/maltodextrin_ABC_transporter_permease_protein_MalF	2.57386	4.51301	0.00259469	0.0384934
k119_535324	Rubrobacter	Carbohydrates	Maltose_and_Maltodextrin_Utilization	Maltose/maltodextrin_ABC_transporter_permease_protein_MalF	2.35568	4.34352	0.0113545	0.0809637
k119_461960	Rubrobacter	Carbohydrates	Maltose_and_Maltodextrin_Utilization	Maltose/maltodextrin_ABC_transporter_permease_protein_MalF	2.91811	4.27639	0.0122396	0.0842118
k119_480469	Rubrobacter	Carbohydrates	Maltose_and_Maltodextrin_Utilization	Maltose/maltodextrin_ABC_transporter_permease_protein_MalF	5.69656	3.12268	0.0151425	0.0945784
k119_441997	Rubrobacter	Carbohydrates	Maltose_and_Maltodextrin_Utilization	Maltose/maltodextrin_ABC_transporter_permease_protein_MalF	6.89476	3.06773	0.00464688	0.0512802
k119_499984	Rubrobacter xylanophilus	Carbohydrates	Maltose_and_Maltodextrin_Utilization	Maltose/maltodextrin_ABC_transporter_permease_protein_MalG	2.31903	5.08098	0.000855227	0.0223624
k119_519624	Thermomicrobia	Carbohydrates	Maltose_and_Maltodextrin_Utilization	Maltose/maltodextrin_ABC_transporter_permease_protein_MalG	3.46263	4.72273	0.00325728	0.0430348
k119_43930	Thermomicrobia	Carbohydrates	Maltose_and_Maltodextrin_Utilization	Maltose/maltodextrin_ABC_transporter_permease_protein_MalG	4.02514	4.41265	0.00387241	0.0467563
k119_461960	Rubrobacter	Carbohydrates	Maltose_and_Maltodextrin_Utilization	Maltose/maltodextrin_ABC_transporter_permease_protein_MalG	2.91811	4.27639	0.0122396	0.0842118
k119_480469	Rubrobacter	Carbohydrates	Maltose_and_Maltodextrin_Utilization	Maltose/maltodextrin_ABC_transporter_permease_protein_MalG	5.69656	3.12268	0.0151425	0.0945784
k119_441997	Rubrobacter	Carbohydrates	Maltose_and_Maltodextrin_Utilization	Maltose/maltodextrin_ABC_transporter_permease_protein_MalG	6.89476	3.06773	0.00464688	0.0512802
k119_284731	Rubrobacter radiotolerans	Carbohydrates	Maltose_and_Maltodextrin_Utilization	Transcriptional_activator_of_maltose_regulon_MalT	12.33	5.93134	0.000136558	0.00808923
k119_490652	Terrabacteria group	Carbohydrates	Maltose_and_Maltodextrin_Utilization	Transcriptional_activator_of_maltose_regulon_MalT	5.0336	5.87321	0.00079207	0.0214786
k119_116928	Terrabacteria group	Carbohydrates	Maltose_and_Maltodextrin_Utilization	Transcriptional_activator_of_maltose_regulon_MalT	4.08568	4.94453	0.00238426	0.0370443
k119_388516	Anaerolineae	Carbohydrates	Maltose_and_Maltodextrin_Utilization	Transcriptional_activator_of_maltose_regulon_MalT	4.22503	4.89583	0.0126637	0.0858899
k119_47625	Chloroflexi	Carbohydrates	Maltose_and_Maltodextrin_Utilization	Transcriptional_activator_of_maltose_regulon_MalT	2.77372	4.88672	0.0145509	0.0925388
k119_227819	Terrabacteria group	Carbohydrates	Maltose_and_Maltodextrin_Utilization	Transcriptional_activator_of_maltose_regulon_MalT	2.55049	4.58403	0.0152221	0.0948735
k119_557755	Terrabacteria group	Carbohydrates	Mannitol_Utilization	Mannitol_1_phosphate_5_dehydrogenase_(EC_1.1.1.17)	3.11687	5.24845	0.00125893	0.0268155
k119_206643	Rubrobacter	Carbohydrates	Mannitol_Utilization	Mannitol_operon_activator_BglG_family	3.37304	3.87321	0.00907368	0.07215
k119_246294	Bacillaceae	Carbohydrates	Mannitol_Utilization	PTS_system_mannitol_specific_IIA_component	4.76105	3.71159	0.0038991	0.0468616
k119_336160	Nocardioides	Carbohydrates	Mannitol_Utilization	PTS_system_mannitol_specific_IIB_component_(EC_2.7.1.69)	3.48396	4.195	0.0117052	0.0822737
k119_448261	Ktedonobacter	Carbohydrates	Mannose_Metabolism	Beta_mannosidase_(EC_3.2.1.25)	2.87873	4.79965	0.0111666	0.0802356
k119_36187	Rubrobacter	Carbohydrates	Mannose_Metabolism	GDP_mannose_mannosyl_hydrolase_(EC_3.6.1._)	2.13954	4.24739	0.00958057	0.0741541
k119_74021	Rubrobacter	Carbohydrates	Mannose_Metabolism	Mannose_1_phosphate_guanylyltransferase_(EC_2.7.7.13_)	4.55318	5.79017	0.000979864	0.0239122
k119_348072	Rubrobacter	Carbohydrates	Mannose_Metabolism	Mannose_1_phosphate_guanylyltransferase_(EC_2.7.7.13_)	8.31265	5.22128	0.000523616	0.01706
k119_420509	Rubrobacter	Carbohydrates	Mannose_Metabolism	Mannose_1_phosphate_guanylyltransferase_(EC_2.7.7.13_)	3.67555	4.91109	0.00312823	0.0421359
k119_526371	Rubrobacter	Carbohydrates	Mannose_Metabolism	Mannose_1_phosphate_guanylyltransferase_(EC_2.7.7.13_)	4.97904	4.76784	0.00188575	0.0329164
k119_394479	Rubrobacter	Carbohydrates	Mannose_Metabolism	Mannose_1_phosphate_guanylyltransferase_(EC_2.7.7.13_)	2.70161	4.3873	0.0113985	0.0810978
k119_194453	Rubrobacter	Carbohydrates	Mannose_Metabolism	Mannose_1_phosphate_guanylyltransferase_(GDP)_(EC_2.7.7.22)	2.92935	5.00298	0.00450693	0.0505149
k119_166955	Actinobacteria	Carbohydrates	Mannose_Metabolism	Mannose_1_phosphate_guanylyltransferase_(GDP)_(EC_2.7.7.22)	3.44728	4.40619	0.00333796	0.0435856
k119_298836	Rubrobacter radiotolerans	Carbohydrates	Mannose_Metabolism	Mannose_1_phosphate_guanylyltransferase_(GDP)_(EC_2.7.7.22)	3.86433	4.0672	0.00650954	0.0609035
k119_543382	Rubrobacter	Carbohydrates	Mannose_Metabolism	Mannose_1_phosphate_guanylyltransferase_(GDP)_(EC_2.7.7.22)	5.55683	3.8877	0.00331806	0.0434492
k119_266071	Actinobacteria <phylum>	Carbohydrates	Mannose_Metabolism	Mannose_1_phosphate_guanylyltransferase_(GDP)_(EC_2.7.7.22)	8.8102	2.82536	0.0105454	0.077794
k119_370991	Rubrobacter	Carbohydrates	Mannose_Metabolism	Phosphomannomutase_(EC_5.4.2.8)	7.5177	5.26554	0.00177768	0.0319518
k119_286562	Rubrobacter	Carbohydrates	Mannose_Metabolism	Phosphomannomutase_(EC_5.4.2.8)	4.03644	5.14474	0.00102558	0.0243695
k119_329079	Rubrobacter	Carbohydrates	Mannose_Metabolism	Phosphomannomutase_(EC_5.4.2.8)	2.5049	4.40665	0.0110142	0.0795272
k119_266249	Rubrobacter	Carbohydrates	Mannose_Metabolism	Phosphomannomutase_(EC_5.4.2.8)	2.27195	4.37928	0.0123003	0.0844403
k119_130385	Rubrobacter	Carbohydrates	Mannose_Metabolism	Phosphomannomutase_(EC_5.4.2.8)	3.33378	4.26007	0.00701672	0.0633235
k119_553656	Rubrobacter	Carbohydrates	Mannose_Metabolism	Phosphomannomutase_(EC_5.4.2.8)	5.7179	4.16326	0.000794906	0.0214924
k119_544278	Acidobacteria	Carbohydrates	Methylglyoxal_Metabolism	Aldehyde_dehydrogenase_B_(EC_1.2.1.22)	5.95735	4.80577	0.00726522	0.0645725
k119_280092	Actinobacteria <phylum>	Carbohydrates	Methylglyoxal_Metabolism	Aldehyde_dehydrogenase_B_(EC_1.2.1.22)	2.82815	4.42946	0.00819726	0.0686456
k119_499199	Rubrobacter	Carbohydrates	Methylglyoxal_Metabolism	Lactoylglutathione_lyase_(EC_4.4.1.5)	10.4966	5.05922	0.000299626	0.0128069
k119_506940	Terrabacteria group	Carbohydrates	Methylglyoxal_Metabolism	Lactoylglutathione_lyase_(EC_4.4.1.5)	3.44075	4.25193	0.00480239	0.0521635
k119_110947	Rubrobacter	Carbohydrates	Methylglyoxal_Metabolism	Lactoylglutathione_lyase_(EC_4.4.1.5)	3.20754	3.82138	0.0144169	0.092132
k119_162288	Rubrobacter	Carbohydrates	Methylglyoxal_Metabolism	Lactoylglutathione_lyase_(EC_4.4.1.5)	4.45257	3.78252	0.00356376	0.0450078
k119_555441	Rubrobacter	Carbohydrates	Pentose_phosphate_pathway	Ribose_phosphate_pyrophosphokinase_(EC_2.7.6.1)	2.68224	5.04833	0.00145205	0.0289602
k119_365113	Rubrobacter	Carbohydrates	Pentose_phosphate_pathway	Ribose_phosphate_pyrophosphokinase_(EC_2.7.6.1)	7.6997	2.8251	0.0162049	0.0981864
k119_509805	Bacteria	Carbohydrates	Photorespiration_(oxidative_C2_cycle)	Catalase_(EC_1.11.1.6)	2.53036	4.26568	0.0149501	0.0939073
k119_408278	Bacteria	Carbohydrates	Photorespiration_(oxidative_C2_cycle)	Catalase_(EC_1.11.1.6)	3.39025	3.54861	0.0142846	0.0917464
k119_130390	Bacteria	Carbohydrates	Photorespiration_(oxidative_C2_cycle)	Catalase_(EC_1.11.1.6)	7.41338	3.26423	0.0167233	0.0999523
k119_543911	Rubrobacter	Carbohydrates	Propanediol_utilization	Cob(II)alamin_reductase	3.63507	5.1546	0.00610383	0.0589128
k119_241496	Rubrobacter	Carbohydrates	Propanediol_utilization	Cob(II)alamin_reductase	2.95409	4.8128	0.00278944	0.0397052
k119_580174	Rubrobacter	Carbohydrates	Propanediol_utilization	Cob(II)alamin_reductase	8.27789	4.04965	0.00039951	0.0148274
k119_556660	Rubrobacter	Carbohydrates	Propionyl_CoA_to_Succinyl_CoA_Module	Methylmalonyl_CoA_epimerase_(EC_5.1.99.1)	3.68369	5.0079	0.00100327	0.0241489
k119_434678	Nitrososphaera	Carbohydrates	Propionyl_CoA_to_Succinyl_CoA_Module	Methylmalonyl_CoA_epimerase_(EC_5.1.99.1)	4.61905	4.79351	0.00268833	0.0390847
k119_306309	Solirubrobacterales	Carbohydrates	Propionyl_CoA_to_Succinyl_CoA_Module	Methylmalonyl_CoA_mutase_(EC_5.4.99.2)	6.3769	5.16911	0.000333242	0.0134929
k119_566933	Rubrobacter	Carbohydrates	Propionyl_CoA_to_Succinyl_CoA_Module	Methylmalonyl_CoA_mutase_(EC_5.4.99.2)	2.7025	4.9218	0.00284374	0.0400869
k119_547390	Rubrobacter	Carbohydrates	Propionyl_CoA_to_Succinyl_CoA_Module	Methylmalonyl_CoA_mutase_(EC_5.4.99.2)	3.65957	4.73208	0.00185797	0.0326295
k119_582019	Rubrobacter	Carbohydrates	Propionyl_CoA_to_Succinyl_CoA_Module	Methylmalonyl_CoA_mutase_(EC_5.4.99.2)	2.47029	4.73197	0.00489575	0.0525896
k119_413285	Rubrobacter	Carbohydrates	Propionyl_CoA_to_Succinyl_CoA_Module	Methylmalonyl_CoA_mutase_(EC_5.4.99.2)	3.10243	4.63233	0.00271319	0.0392221
k119_8704	Rubrobacter	Carbohydrates	Propionyl_CoA_to_Succinyl_CoA_Module	Methylmalonyl_CoA_mutase_(EC_5.4.99.2)	2.93484	4.49615	0.00251259	0.0378612
k119_183778	Rubrobacter	Carbohydrates	Propionyl_CoA_to_Succinyl_CoA_Module	Methylmalonyl_CoA_mutase_(EC_5.4.99.2)	2.23204	4.21709	0.0124701	0.0851394
k119_126568	Bacteria	Carbohydrates	Propionyl_CoA_to_Succinyl_CoA_Module	Methylmalonyl_CoA_mutase_(EC_5.4.99.2)	2.9291	3.86842	0.0106308	0.0780558
k119_380797	Actinobacteria <phylum>	Carbohydrates	Pyruvate_Alanine_Serine_Interconversions	Alanine_dehydrogenase_(EC_1.4.1.1)	3.96738	5.90263	0.000127841	0.00778789
k119_23036	Actinobacteria <phylum>	Carbohydrates	Pyruvate_Alanine_Serine_Interconversions	Alanine_dehydrogenase_(EC_1.4.1.1)	4.22765	5.02842	0.00378298	0.0462355
k119_579789	Actinobacteria <phylum>	Carbohydrates	Pyruvate_Alanine_Serine_Interconversions	Alanine_dehydrogenase_(EC_1.4.1.1)	2.36725	4.77086	0.00363594	0.0454134
k119_170079	Rubrobacter	Carbohydrates	Pyruvate_Alanine_Serine_Interconversions	Omega_amino_acid__pyruvate_aminotransferase_(EC_2.6.1.18)	3.81624	5.1169	0.00804398	0.0680167
k119_501269	Rubrobacter	Carbohydrates	Pyruvate_Alanine_Serine_Interconversions	Omega_amino_acid__pyruvate_aminotransferase_(EC_2.6.1.18)	3.85003	5.08572	0.0103133	0.076963
k119_162485	Rubrobacter	Carbohydrates	Pyruvate_Alanine_Serine_Interconversions	Omega_amino_acid__pyruvate_aminotransferase_(EC_2.6.1.18)	4.73792	4.59167	0.00125566	0.0267702
k119_173672	Rubrobacter	Carbohydrates	Pyruvate_Alanine_Serine_Interconversions	Omega_amino_acid__pyruvate_aminotransferase_(EC_2.6.1.18)	6.46435	4.4933	0.00024693	0.0113828
k119_378187	Rubrobacter	Carbohydrates	Pyruvate_Alanine_Serine_Interconversions	Omega_amino_acid__pyruvate_aminotransferase_(EC_2.6.1.18)	3.70599	4.31973	0.0120483	0.0836045
k119_8889	Rubrobacter	Carbohydrates	Pyruvate_Alanine_Serine_Interconversions	Omega_amino_acid__pyruvate_aminotransferase_(EC_2.6.1.18)	5.06117	4.21815	0.00338447	0.0438697
k119_194034	Rubrobacter	Carbohydrates	Pyruvate_Alanine_Serine_Interconversions	Omega_amino_acid__pyruvate_aminotransferase_(EC_2.6.1.18)	4.51663	3.85661	0.00271692	0.0392435
k119_77459	Bacteria	Carbohydrates	Pyruvate_metabolism_I:_anaplerotic_reactions_PEP	D_malic_enzyme_(EC_1.1.1.83)	3.46159	4.89716	0.00384099	0.0466282
k119_279379	Rubrobacter xylanophilus	Carbohydrates	Pyruvate_metabolism_II:_acetyl_CoA_acetogenesis_from_pyruvate	Acetate_permease_ActP_(cation/acetate_symporter)	2.96016	5.60451	0.000200951	0.0101678
k119_466772	Bacteria	Carbohydrates	Pyruvate_metabolism_II:_acetyl_CoA_acetogenesis_from_pyruvate	Acetyl_CoA_synthetase_(ADP_forming)_alpha_and_beta_chains_putative	2.66606	5.10249	0.00405712	0.0480059
k119_241152	Bacteria	Carbohydrates	Pyruvate_metabolism_II:_acetyl_CoA_acetogenesis_from_pyruvate	Acetyl_CoA_synthetase_(ADP_forming)_alpha_and_beta_chains_putative	5.45722	4.40232	0.0016292	0.0305554
k119_163145	Rubrobacter	Carbohydrates	Pyruvate_metabolism_II:_acetyl_CoA_acetogenesis_from_pyruvate	Acetyl_CoA_synthetase_(ADP_forming)_alpha_and_beta_chains_putative	2.24798	4.37722	0.0124489	0.0850434
k119_58126	Terrabacteria group	Carbohydrates	Pyruvate_metabolism_II:_acetyl_CoA_acetogenesis_from_pyruvate	Acetyl_CoA_synthetase_(ADP_forming)_alpha_and_beta_chains_putative	5.07186	4.21294	0.00226915	0.0361817
k119_325428	Candidatus Nitrososphaera gargensis Ga9.2	Carbohydrates	Pyruvate_metabolism_II:_acetyl_CoA_acetogenesis_from_pyruvate	Acetyl_CoA_synthetase_(ADP_forming)_alpha_chain_(EC_6.2.1.13)	3.84285	5.24502	0.00116904	0.0259434
k119_48564	Terrabacteria group	Carbohydrates	Pyruvate_metabolism_II:_acetyl_CoA_acetogenesis_from_pyruvate	Acylphosphate_phosphohydrolase_(EC_3.6.1.7)_putative	3.69405	4.43887	0.00263414	0.0387145
k119_108678	Actinobacteria	Carbohydrates	Pyruvate_metabolism_II:_acetyl_CoA_acetogenesis_from_pyruvate	Protein_acetyltransferase	4.7706	5.70192	0.0012406	0.0266531
k119_435477	Bacteria	Carbohydrates	Pyruvate_metabolism_II:_acetyl_CoA_acetogenesis_from_pyruvate	Protein_acetyltransferase	2.65457	4.53496	0.00717615	0.0641432
k119_181839	Sphaerobacter thermophilus	Carbohydrates	Pyruvate_metabolism_II:_acetyl_CoA_acetogenesis_from_pyruvate	Protein_acetyltransferase	4.14571	4.1595	0.00151762	0.0295421
k119_506620	Rubrobacter xylanophilus	Carbohydrates	Pyruvate:ferredoxin_oxidoreductase	Pyruvate:ferredoxin_oxidoreductase_alpha_subunit_(EC_1.2.7.1)	2.18803	3.96583	0.0143512	0.0919941
k119_512020	Rubrobacter xylanophilus	Carbohydrates	Pyruvate:ferredoxin_oxidoreductase	Pyruvate:ferredoxin_oxidoreductase_beta_subunit_(EC_1.2.7.1)	15.5805	4.91958	0.000231137	0.0110405
k119_567223	Rubrobacter xylanophilus	Carbohydrates	Pyruvate:ferredoxin_oxidoreductase	Pyruvate:ferredoxin_oxidoreductase_delta_subunit_(EC_1.2.7.1)	4.65966	5.05441	0.00050687	0.0167711
k119_11795	Rubrobacter xylanophilus	Carbohydrates	Pyruvate:ferredoxin_oxidoreductase	Pyruvate:ferredoxin_oxidoreductase_delta_subunit_(EC_1.2.7.1)	8.29706	4.24378	0.000920782	0.023202
k119_36124	Rubrobacter	Carbohydrates	Serine_glyoxylate_cycle	polyhydroxyalkanoate_synthesis_repressor_PhaR	3.40729	4.35281	0.00566925	0.0567032
k119_30170	Rubrobacter xylanophilus	Carbohydrates	Serine_glyoxylate_cycle	polyhydroxyalkanoate_synthesis_repressor_PhaR	4.37809	3.01394	0.0143872	0.0920376
k119_449528	Actinobacteria	Carbohydrates	Serine_glyoxylate_cycle	Propionyl_CoA_carboxylase_beta_chain_(EC_6.4.1.3)	3.48686	5.48418	0.00272464	0.0393232
k119_284444	Rubrobacter	Carbohydrates	Serine_glyoxylate_cycle	Propionyl_CoA_carboxylase_beta_chain_(EC_6.4.1.3)	4.79733	4.7062	0.000350843	0.0138796
k119_330320	Rubrobacter aplysinae	Carbohydrates	Soluble_methane_monooxygenase_(sMMO)	Methane_monooxygenase_component_A_beta_chain_(EC_1.14.13.25)	5.49945	3.93087	0.00816557	0.0685589
k119_142402	Actinobacteria <phylum>	Carbohydrates	Soluble_methane_monooxygenase_(sMMO)	Methane_monooxygenase_component_A_beta_chain_(EC_1.14.13.25)	12.2887	3.44357	0.000537278	0.0173369
k119_141827	Rubrobacter aplysinae	Carbohydrates	Soluble_methane_monooxygenase_(sMMO)	Methane_monooxygenase_component_A_beta_chain_(EC_1.14.13.25)	7.23751	3.41174	0.0105673	0.0778286
k119_508080	Terrabacteria group	Carbohydrates	Sugar_utilization_in_Thermotogales	Xylose_isomerase_(EC_5.3.1.5)	5.08694	4.62949	0.00146537	0.0291122
k119_498178	Actinobacteria	Carbohydrates	Sugar_utilization_in_Thermotogales	Xylose_isomerase_(EC_5.3.1.5)	2.59936	4.35592	0.0032718	0.0431308
k119_533366	Bacteria	Carbohydrates	Sugar_utilization_in_Thermotogales	Xylose_isomerase_(EC_5.3.1.5)	4.01828	3.87599	0.00670132	0.0619229
k119_486599	Rubrobacter	Carbohydrates	Trehalose__metabolism_in_plants	Alphaalpha_trehalose_phosphate_synthase_[UDP_forming]_(EC_2.4.1.15)	2.75085	4.71527	0.00421276	0.0488799
k119_456763	Rubrobacter xylanophilus	Carbohydrates	Trehalose__metabolism_in_plants	Alphaalpha_trehalose_phosphate_synthase_[UDP_forming]_(EC_2.4.1.15)	2.85423	4.58118	0.00361675	0.0453053
k119_18614	Actinobacteria <phylum>	Carbohydrates	Trehalose__metabolism_in_plants	Trehalose_6_phosphate_phosphatase_(EC_3.1.3.12)	3.21751	5.12768	0.0057938	0.0573383
k119_123409	Rubrobacter xylanophilus	Carbohydrates	Trehalose__metabolism_in_plants	Trehalose_6_phosphate_phosphatase_(EC_3.1.3.12)	4.01225	4.75304	0.00239874	0.0371115
k119_499325	Actinobacteria <phylum>	Carbohydrates	Trehalose__metabolism_in_plants	Trehalose_6_phosphate_phosphatase_(EC_3.1.3.12)	2.53084	4.60172	0.0128514	0.0866143
k119_316296	Rubrobacter	Carbohydrates	Trehalose_Biosynthesis	Trehalose_synthase_(EC_5.4.99.16)	2.6994	4.93016	0.00909042	0.0722387
k119_23040	Bacteria	Carbohydrates	Trehalose_Biosynthesis	Trehalose_synthase_(EC_5.4.99.16)	5.36849	4.53812	0.00172856	0.031484
k119_402425	Geodermatophilaceae	Carbohydrates	Trehalose_Biosynthesis	Trehalose_synthase_(EC_5.4.99.16)	6.50134	3.16091	0.0121479	0.0838756
k119_411426	Actinobacteria	Carbohydrates	Trehalose_Biosynthesis	Trehalose_synthase_(EC_5.4.99.16)	11.3815	2.58568	0.0163177	0.098552
k119_257487	Proteobacteria	Carbohydrates	Xylose_utilization	Xylonate_dehydratase_(EC_4.2.1.82)	5.20119	4.14017	0.00254783	0.0381575
k119_218756	Rubrobacter	Cell_Division_and_Cell_Cycle	Bacterial_Cytoskeleton	Cell_division_initiation_protein_DivIVA	2.31837	4.92868	0.00245259	0.0374789
k119_357357	Rubrobacter	Cell_Division_and_Cell_Cycle	Bacterial_Cytoskeleton	Cell_division_initiation_protein_DivIVA	5.55687	4.1082	0.000600306	0.018506
k119_45579	Rubrobacter xylanophilus	Cell_Division_and_Cell_Cycle	Bacterial_Cytoskeleton	Cell_division_protein_FtsA	4.60575	5.2728	0.000260745	0.0117413
k119_340122	Bacteria	Cell_Division_and_Cell_Cycle	Bacterial_Cytoskeleton	Cell_division_protein_FtsI_[Peptidoglycan_synthetase]_(EC_2.4.1.129)	2.86839	5.38562	0.00335908	0.0436846
k119_141276	Rubrobacter	Cell_Division_and_Cell_Cycle	Bacterial_Cytoskeleton	Cell_division_protein_FtsI_[Peptidoglycan_synthetase]_(EC_2.4.1.129)	4.48743	5.19891	0.000841933	0.0221789
k119_404848	Rubrobacter xylanophilus	Cell_Division_and_Cell_Cycle	Bacterial_Cytoskeleton	Cell_division_protein_FtsI_[Peptidoglycan_synthetase]_(EC_2.4.1.129)	3.55574	4.94144	0.00545321	0.055527
k119_106553	Rubrobacter	Cell_Division_and_Cell_Cycle	Bacterial_Cytoskeleton	Cell_division_protein_FtsI_[Peptidoglycan_synthetase]_(EC_2.4.1.129)	2.30194	4.85563	0.00268189	0.0390417
k119_174522	Rubrobacter	Cell_Division_and_Cell_Cycle	Bacterial_Cytoskeleton	Cell_division_protein_FtsI_[Peptidoglycan_synthetase]_(EC_2.4.1.129)	5.20789	4.78016	0.000222324	0.010822
k119_382968	Rubrobacter	Cell_Division_and_Cell_Cycle	Bacterial_Cytoskeleton	Cell_division_protein_FtsI_[Peptidoglycan_synthetase]_(EC_2.4.1.129)	2.55097	4.40199	0.00523417	0.0544982
k119_547767	Bacteria	Cell_Division_and_Cell_Cycle	Bacterial_Cytoskeleton	Cell_division_protein_FtsK	4.57768	6.13705	8.22328e-05	0.00591132
k119_126645	Rubrobacter	Cell_Division_and_Cell_Cycle	Bacterial_Cytoskeleton	Cell_division_protein_FtsK	3.70043	4.28103	0.00291621	0.0405712
k119_79678	Rubrobacter xylanophilus	Cell_Division_and_Cell_Cycle	Bacterial_Cytoskeleton	Cell_division_protein_FtsQ	13.2852	4.95864	2.77708e-05	0.00291476
k119_274307	Rubrobacter xylanophilus	Cell_Division_and_Cell_Cycle	Bacterial_Cytoskeleton	Cell_division_protein_FtsQ	3.17296	4.57478	0.0156867	0.0964036
k119_88798	Rubrobacter	Cell_Division_and_Cell_Cycle	Bacterial_Cytoskeleton	Cell_division_protein_FtsQ	2.66892	3.54405	0.0153634	0.0953844
k119_280424	Rubrobacter	Cell_Division_and_Cell_Cycle	Bacterial_Cytoskeleton	Cell_division_protein_FtsW	5.16865	6.29168	4.45296e-05	0.00395078
k119_501635	Rubrobacter	Cell_Division_and_Cell_Cycle	Bacterial_Cytoskeleton	Cell_division_protein_FtsW	4.59799	4.88079	0.00217325	0.0354034
k119_371252	Rubrobacter	Cell_Division_and_Cell_Cycle	Bacterial_Cytoskeleton	Cell_division_protein_FtsW	2.58224	4.34866	0.0102488	0.0768158
k119_45579	Rubrobacter xylanophilus	Cell_Division_and_Cell_Cycle	Bacterial_Cytoskeleton	Cell_division_protein_FtsZ_(EC_3.4.24._)	4.60575	5.2728	0.000260745	0.0117413
k119_74367	Archaea	Cell_Division_and_Cell_Cycle	Bacterial_Cytoskeleton	Cell_division_protein_FtsZ_(EC_3.4.24._)	3.98006	4.57478	0.00469019	0.0515126
k119_460335	Rubrobacter	Cell_Division_and_Cell_Cycle	Bacterial_Cytoskeleton	Cell_division_protein_FtsZ_(EC_3.4.24._)	3.94739	4.4473	0.00206531	0.0345203
k119_304976	Actinobacteria	Cell_Division_and_Cell_Cycle	Bacterial_Cytoskeleton	Cell_division_protein_FtsZ_(EC_3.4.24._)	6.44987	4.09581	0.000478877	0.0163433
k119_88058	Rubrobacter	Cell_Division_and_Cell_Cycle	Bacterial_Cytoskeleton	Cell_division_protein_FtsZ_(EC_3.4.24._)	2.48986	3.97426	0.00982819	0.0750873
k119_422429	Rubrobacter	Cell_Division_and_Cell_Cycle	Bacterial_Cytoskeleton	Cell_division_protein_FtsZ_(EC_3.4.24._)	3.65379	3.68159	0.0161136	0.0978635
k119_494629	Rubrobacter	Cell_Division_and_Cell_Cycle	Bacterial_Cytoskeleton	Cell_division_protein_FtsZ_(EC_3.4.24._)	9.63646	2.73944	0.00468107	0.0514738
k119_85266	Actinobacteria <phylum>	Cell_Division_and_Cell_Cycle	Bacterial_Cytoskeleton	Cell_division_protein_MraZ	3.78936	5.55377	0.00229799	0.0364492
k119_304279	Rubrobacter	Cell_Division_and_Cell_Cycle	Bacterial_Cytoskeleton	Chromosome_(plasmid)_partitioning_protein_ParA	4.13992	5.86544	6.43983e-05	0.00504094
k119_43025	Rubrobacter radiotolerans	Cell_Division_and_Cell_Cycle	Bacterial_Cytoskeleton	Chromosome_(plasmid)_partitioning_protein_ParA	3.26062	5.12617	0.00410642	0.0483108
k119_152711	Rubrobacter	Cell_Division_and_Cell_Cycle	Bacterial_Cytoskeleton	Chromosome_(plasmid)_partitioning_protein_ParA	3.28521	4.99572	0.00104129	0.0245397
k119_508286	Bacteria	Cell_Division_and_Cell_Cycle	Bacterial_Cytoskeleton	Chromosome_(plasmid)_partitioning_protein_ParA	2.57609	4.95615	0.00699791	0.0632368
k119_152303	Rubrobacter radiotolerans	Cell_Division_and_Cell_Cycle	Bacterial_Cytoskeleton	Chromosome_(plasmid)_partitioning_protein_ParA	3.13189	4.80117	0.00134756	0.0277525
k119_309684	Rubrobacter radiotolerans	Cell_Division_and_Cell_Cycle	Bacterial_Cytoskeleton	Chromosome_(plasmid)_partitioning_protein_ParA	3.58361	4.71548	0.00188832	0.0329317
k119_84591	Bacteria	Cell_Division_and_Cell_Cycle	Bacterial_Cytoskeleton	Chromosome_(plasmid)_partitioning_protein_ParA	3.62504	4.09827	0.0059631	0.0581546
k119_90373	Bacteria	Cell_Division_and_Cell_Cycle	Bacterial_Cytoskeleton	Chromosome_(plasmid)_partitioning_protein_ParA	3.91911	3.93968	0.00964104	0.0744036
k119_574270	Actinobacteria <phylum>	Cell_Division_and_Cell_Cycle	Bacterial_Cytoskeleton	Chromosome_(plasmid)_partitioning_protein_ParA	5.74475	3.92355	0.0131372	0.0876342
k119_350197	Rubrobacter radiotolerans	Cell_Division_and_Cell_Cycle	Bacterial_Cytoskeleton	Chromosome_(plasmid)_partitioning_protein_ParA	4.48881	3.71814	0.00379391	0.0463183
k119_448096	Acidobacteria	Cell_Division_and_Cell_Cycle	Bacterial_Cytoskeleton	Rod_shape_determining_protein_MreB	6.90955	5.87252	3.11278e-05	0.00312183
k119_581540	Acidobacteria	Cell_Division_and_Cell_Cycle	Bacterial_Cytoskeleton	Rod_shape_determining_protein_MreB	4.6907	5.05211	0.00699022	0.0632157
k119_302446	Rubrobacter	Cell_Division_and_Cell_Cycle	Bacterial_Cytoskeleton	Rod_shape_determining_protein_MreB	2.51111	4.86451	0.0084753	0.0697021
k119_184362	Rubrobacter	Cell_Division_and_Cell_Cycle	Bacterial_Cytoskeleton	Rod_shape_determining_protein_MreB	4.59236	3.42617	0.00755178	0.0658522
k119_155099	Rubrobacter xylanophilus	Cell_Division_and_Cell_Cycle	Bacterial_Cytoskeleton	Rod_shape_determining_protein_RodA	7.8209	6.01022	6.00938e-05	0.00482146
k119_547263	Rubrobacter	Cell_Division_and_Cell_Cycle	Bacterial_Cytoskeleton	Rod_shape_determining_protein_RodA	3.01781	5.2045	0.00278778	0.0397052
k119_135813	Rubrobacter xylanophilus	Cell_Division_and_Cell_Cycle	Bacterial_Cytoskeleton	Rod_shape_determining_protein_RodA	4.40272	4.18103	0.00369401	0.0456695
k119_312321	Rubrobacter xylanophilus	Cell_Division_and_Cell_Cycle	Bacterial_Cytoskeleton	Rod_shape_determining_protein_RodA	4.73365	4.0137	0.00344808	0.0442194
k119_262351	Rubrobacter xylanophilus	Cell_Division_and_Cell_Cycle	Control_of_cell_elongation___division_cycle_in_Bacilli	Endonuclease_III_(EC_4.2.99.18)	4.0476	5.04684	0.00121959	0.0264663
k119_100279	Oscillatoria sp. PCC 10802	Cell_Division_and_Cell_Cycle	Cyanobacterial_Circadian_Clock	Circadian_input_kinase_A	3.74139	5.00114	0.0112988	0.0807462
k119_447021	Cyanobacteria	Cell_Division_and_Cell_Cycle	Cyanobacterial_Circadian_Clock	Circadian_input_kinase_A	2.57717	4.59978	0.0105237	0.0777488
k119_299398	Oscillatoriales	Cell_Division_and_Cell_Cycle	Cyanobacterial_Circadian_Clock	Circadian_input_kinase_A	2.61237	4.55729	0.00499032	0.053097
k119_62718	Bacteria	Cell_Division_and_Cell_Cycle	Cyanobacterial_Circadian_Clock	Circadian_input_kinase_A	2.745	4.35424	0.0130157	0.0871522
k119_447853	Oscillatoriales	Cell_Division_and_Cell_Cycle	Cyanobacterial_Circadian_Clock	Circadian_input_kinase_A	5.93649	4.07097	0.0107998	0.0786936
k119_104174	Rubrobacter radiotolerans	Cell_Division_and_Cell_Cycle	Diadenylate_cyclase_cluster	Phosphoglucosamine_mutase_(EC_5.4.2.10)	4.77903	4.75637	0.000239252	0.0111824
k119_157510	Rubrobacter xylanophilus	Cell_Division_and_Cell_Cycle	Macromolecular_synthesis_operon	DNA_primase_(EC_2.7.7._)	9.48184	5.58512	7.09473e-05	0.00536333
k119_435459	Cyanobacteria	Cell_Division_and_Cell_Cycle	Macromolecular_synthesis_operon	DNA_primase_(EC_2.7.7._)	2.87625	4.56165	0.0125042	0.0852711
k119_339120	Rubrobacter	Cell_Division_and_Cell_Cycle	Macromolecular_synthesis_operon	DNA_primase_(EC_2.7.7._)	2.83816	3.66888	0.00918553	0.0726253
k119_405796	Cyanobacteria	Cell_Division_and_Cell_Cycle	Macromolecular_synthesis_operon	DNA_primase_(EC_2.7.7._)	8.56074	3.49223	0.0163879	0.0987857
k119_568070	Planctomycetaceae	Cell_Division_and_Cell_Cycle	Macromolecular_synthesis_operon	RNA_polymerase_sigma_factor_RpoD	4.42887	5.35334	0.00603697	0.058539
k119_19550	Rubrobacter	Cell_Division_and_Cell_Cycle	Macromolecular_synthesis_operon	RNA_polymerase_sigma_factor_RpoD	4.47544	5.32312	0.000759724	0.0210293
k119_481396	Actinobacteria <phylum>	Cell_Division_and_Cell_Cycle	Macromolecular_synthesis_operon	RNA_polymerase_sigma_factor_RpoD	4.87213	5.27381	0.000371001	0.0142414
k119_360242	Rubrobacter	Cell_Division_and_Cell_Cycle	Macromolecular_synthesis_operon	RNA_polymerase_sigma_factor_RpoD	3.41425	5.12304	0.00178501	0.0320295
k119_114137	Rubrobacter	Cell_Division_and_Cell_Cycle	Macromolecular_synthesis_operon	RNA_polymerase_sigma_factor_RpoD	3.28683	4.81921	0.00209488	0.0347848
k119_314156	Rubrobacter	Cell_Division_and_Cell_Cycle	Macromolecular_synthesis_operon	RNA_polymerase_sigma_factor_RpoD	2.95734	4.71374	0.00273347	0.0393575
k119_280823	Rubrobacter xylanophilus	Cell_Division_and_Cell_Cycle	Macromolecular_synthesis_operon	RNA_polymerase_sigma_factor_RpoD	2.32809	4.6595	0.00641794	0.0604214
k119_559920	Rubrobacter	Cell_Division_and_Cell_Cycle	Macromolecular_synthesis_operon	RNA_polymerase_sigma_factor_RpoD	2.92285	4.60769	0.00413589	0.0484461
k119_453454	Rubrobacter	Cell_Division_and_Cell_Cycle	Macromolecular_synthesis_operon	RNA_polymerase_sigma_factor_RpoD	3.51472	4.49783	0.00555579	0.0560693
k119_98223	Rubrobacter	Cell_Division_and_Cell_Cycle	Macromolecular_synthesis_operon	RNA_polymerase_sigma_factor_RpoD	2.71328	4.47958	0.00323546	0.0428538
k119_309498	Rubrobacter	Cell_Division_and_Cell_Cycle	Macromolecular_synthesis_operon	RNA_polymerase_sigma_factor_RpoD	4.05269	4.42291	0.00474969	0.0518578
k119_464396	Rubrobacter	Cell_Division_and_Cell_Cycle	Macromolecular_synthesis_operon	RNA_polymerase_sigma_factor_RpoD	4.97477	4.32879	0.00139028	0.0282745
k119_76564	Rubrobacter	Cell_Division_and_Cell_Cycle	Macromolecular_synthesis_operon	RNA_polymerase_sigma_factor_RpoD	2.36563	4.30525	0.0058355	0.0575175
k119_58441	Actinobacteria <phylum>	Cell_Division_and_Cell_Cycle	Macromolecular_synthesis_operon	RNA_polymerase_sigma_factor_RpoD	3.71188	4.21813	0.0116435	0.0820327
k119_448035	Actinobacteria <phylum>	Cell_Division_and_Cell_Cycle	Macromolecular_synthesis_operon	RNA_polymerase_sigma_factor_RpoD	3.93019	4.21184	0.0102552	0.0768243
k119_196835	bacterium JKG1	Cell_Division_and_Cell_Cycle	Macromolecular_synthesis_operon	RNA_polymerase_sigma_factor_RpoD	3.25486	4.20117	0.0121394	0.0838686
k119_306246	Rubrobacter	Cell_Division_and_Cell_Cycle	Macromolecular_synthesis_operon	RNA_polymerase_sigma_factor_RpoD	2.84374	4.1999	0.00765003	0.0663021
k119_355800	Rubrobacter xylanophilus	Cell_Division_and_Cell_Cycle	Macromolecular_synthesis_operon	RNA_polymerase_sigma_factor_RpoD	2.36631	4.1818	0.0150338	0.0942047
k119_566676	Bacteria	Cell_Division_and_Cell_Cycle	Macromolecular_synthesis_operon	RNA_polymerase_sigma_factor_RpoD	5.32114	4.15971	0.00873768	0.0709377
k119_178480	unclassified Acidobacteria	Cell_Division_and_Cell_Cycle	Macromolecular_synthesis_operon	RNA_polymerase_sigma_factor_RpoD	6.18025	4.09955	0.0133005	0.0882081
k119_432826	Rubrobacter	Cell_Division_and_Cell_Cycle	Macromolecular_synthesis_operon	RNA_polymerase_sigma_factor_RpoD	4.16264	4.08305	0.00897883	0.0717395
k119_227595	Rubrobacter	Cell_Division_and_Cell_Cycle	Macromolecular_synthesis_operon	RNA_polymerase_sigma_factor_RpoD	9.57172	4.0374	0.000708648	0.0202572
k119_366105	Bacteria	Cell_Division_and_Cell_Cycle	Macromolecular_synthesis_operon	RNA_polymerase_sigma_factor_RpoD	7.42329	4.00664	0.00557515	0.0561577
k119_12811	Rubrobacter	Cell_Division_and_Cell_Cycle	Macromolecular_synthesis_operon	RNA_polymerase_sigma_factor_RpoD	4.35824	3.9508	0.0123215	0.0845205
k119_527300	Rubrobacter	Cell_Division_and_Cell_Cycle	Macromolecular_synthesis_operon	RNA_polymerase_sigma_factor_RpoD	5.10983	3.87889	0.00435002	0.049582
k119_91226	Rubrobacter xylanophilus	Cell_Division_and_Cell_Cycle	Macromolecular_synthesis_operon	RNA_polymerase_sigma_factor_RpoD	4.37774	3.77735	0.00535173	0.0550704
k119_285112	Rubrobacter	Cell_Division_and_Cell_Cycle	Macromolecular_synthesis_operon	RNA_polymerase_sigma_factor_RpoD	3.98724	3.5976	0.0152443	0.0949557
k119_559456	Rubrobacter	Cell_Division_and_Cell_Cycle	Macromolecular_synthesis_operon	RNA_polymerase_sigma_factor_RpoD	4.85015	3.5378	0.00538787	0.0552423
k119_31713	Rubrobacter	Cell_Division_and_Cell_Cycle	Macromolecular_synthesis_operon	RNA_polymerase_sigma_factor_RpoD	14.1843	3.52122	0.00127852	0.0270241
k119_582529	Rubrobacter	Cell_Division_and_Cell_Cycle	Macromolecular_synthesis_operon	RNA_polymerase_sigma_factor_RpoD	15.3927	3.49932	0.000447097	0.0158607
k119_345035	Rubrobacter	Cell_Division_and_Cell_Cycle	Macromolecular_synthesis_operon	RNA_polymerase_sigma_factor_RpoD	5.28482	3.48375	0.0150169	0.0941346
k119_127063	Rubrobacter	Cell_Division_and_Cell_Cycle	Macromolecular_synthesis_operon	RNA_polymerase_sigma_factor_RpoD	7.63123	3.45765	0.00218876	0.035523
k119_511415	Actinobacteria <phylum>	Cell_Division_and_Cell_Cycle	Macromolecular_synthesis_operon	RNA_polymerase_sigma_factor_RpoD	3.30719	3.40027	0.0160336	0.0975934
k119_5545	Rubrobacter	Cell_Division_and_Cell_Cycle	Macromolecular_synthesis_operon	RNA_polymerase_sigma_factor_RpoD	6.62458	3.38032	0.00685813	0.0625985
k119_336058	Rubrobacter	Cell_Division_and_Cell_Cycle	Macromolecular_synthesis_operon	RNA_polymerase_sigma_factor_RpoD	7.59748	3.32931	0.00744447	0.0654182
k119_259279	Bacteria	Cell_Division_and_Cell_Cycle	Macromolecular_synthesis_operon	RNA_polymerase_sigma_factor_RpoD	12.3146	2.92328	0.0157001	0.0964376
k119_386796	Rubrobacter	Cell_Division_and_Cell_Cycle	Macromolecular_synthesis_operon	RNA_polymerase_sigma_factor_RpoD	15.3747	2.86406	0.00755593	0.0658805
k119_99695	Nitrososphaera	Cell_Division_and_Cell_Cycle	Macromolecular_synthesis_operon	TsaD/Kae1/Qri7_protein_required_for_threonylcarbamoyladenosine_t(6)A37_formation_in_tRNA	2.70144	4.83288	0.008467	0.0696727
k119_267946	Rubrobacter	Cell_Division_and_Cell_Cycle	Two_cell_division_clusters_relating_to_chromosome_partitioning	Chromosome_partition_protein_smc	3.39525	5.37626	0.00181044	0.0322208
k119_375189	Rubrobacter	Cell_Division_and_Cell_Cycle	Two_cell_division_clusters_relating_to_chromosome_partitioning	Chromosome_partition_protein_smc	5.09593	5.10472	0.000453829	0.0159812
k119_538009	Terrabacteria group	Cell_Division_and_Cell_Cycle	Two_cell_division_clusters_relating_to_chromosome_partitioning	Chromosome_partition_protein_smc	2.46714	4.70314	0.0112911	0.0807303
k119_307548	Rubrobacter	Cell_Division_and_Cell_Cycle	Two_cell_division_clusters_relating_to_chromosome_partitioning	Chromosome_partition_protein_smc	2.58757	4.51689	0.00422154	0.0489097
k119_392571	Rubrobacter	Cell_Division_and_Cell_Cycle	Two_cell_division_clusters_relating_to_chromosome_partitioning	Chromosome_partition_protein_smc	2.47359	4.42765	0.0108725	0.078944
k119_257875	Rubrobacter	Cell_Division_and_Cell_Cycle	Two_cell_division_clusters_relating_to_chromosome_partitioning	Chromosome_partition_protein_smc	4.73115	4.33181	0.00117765	0.026005
k119_506481	Rubrobacter radiotolerans	Cell_Division_and_Cell_Cycle	Two_cell_division_clusters_relating_to_chromosome_partitioning	Chromosome_partition_protein_smc	2.10623	4.23934	0.0121222	0.0838174
k119_219407	Rubrobacter	Cell_Division_and_Cell_Cycle	Two_cell_division_clusters_relating_to_chromosome_partitioning	Chromosome_partition_protein_smc	10.1177	3.71732	0.000240336	0.0111976
k119_576443	Rubrobacter	Cell_Division_and_Cell_Cycle	Two_cell_division_clusters_relating_to_chromosome_partitioning	Ribonuclease_III_(EC_3.1.26.3)	4.39769	3.64824	0.00405385	0.0479913
k119_279150	Rubrobacter	Cell_Division_and_Cell_Cycle	Two_cell_division_clusters_relating_to_chromosome_partitioning	Ribosomal_large_subunit_pseudouridine_synthase_B_(EC_4.2.1.70)	3.13288	4.89006	0.00233399	0.0366936
k119_171515	Nitrososphaera	Cell_Division_and_Cell_Cycle	Two_cell_division_clusters_relating_to_chromosome_partitioning	Segregation_and_condensation_protein_A	3.67842	5.43201	0.000540001	0.0173717
k119_127569	Rubrobacter	Cell_Division_and_Cell_Cycle	Two_cell_division_clusters_relating_to_chromosome_partitioning	Signal_recognition_particle_receptor_protein_FtsY_(=alpha_subunit)_(TC_3.A.5.1.1)	2.83955	4.62847	0.00197842	0.0337377
k119_506481	Rubrobacter radiotolerans	Cell_Division_and_Cell_Cycle	Two_cell_division_clusters_relating_to_chromosome_partitioning	Signal_recognition_particle_receptor_protein_FtsY_(=alpha_subunit)_(TC_3.A.5.1.1)	2.10623	4.23934	0.0121222	0.0838174
k119_482925	Rubrobacter	Cell_Division_and_Cell_Cycle	Two_cell_division_clusters_relating_to_chromosome_partitioning	Signal_recognition_particle_receptor_protein_FtsY_(=alpha_subunit)_(TC_3.A.5.1.1)	3.94464	4.20111	0.00182522	0.032367
k119_562107	Archaea	Cell_Division_and_Cell_Cycle	Two_cell_division_clusters_relating_to_chromosome_partitioning	Signal_recognition_particle_subunit_Ffh_SRP54_(TC_3.A.5.1.1)	2.70155	4.9189	0.00852068	0.0699338
k119_45261	Rubrobacter	Cell_Division_and_Cell_Cycle	Two_cell_division_clusters_relating_to_chromosome_partitioning	Signal_recognition_particle_subunit_Ffh_SRP54_(TC_3.A.5.1.1)	2.60222	4.74065	0.00204672	0.0344206
k119_218878	Sphingomonas	Cell_Division_and_Cell_Cycle	Two_cell_division_clusters_relating_to_chromosome_partitioning	Signal_recognition_particle_subunit_Ffh_SRP54_(TC_3.A.5.1.1)	3.31825	4.72681	0.00972619	0.0746787
k119_523760	Solirubrobacterales	Cell_Division_and_Cell_Cycle	Two_cell_division_clusters_relating_to_chromosome_partitioning	Signal_recognition_particle_subunit_Ffh_SRP54_(TC_3.A.5.1.1)	2.40907	4.45789	0.0156293	0.0962345
k119_112825	Rubrobacter	Cell_Division_and_Cell_Cycle	Two_cell_division_clusters_relating_to_chromosome_partitioning	Signal_recognition_particle_subunit_Ffh_SRP54_(TC_3.A.5.1.1)	2.93627	4.24573	0.00752928	0.0657746
k119_482925	Rubrobacter	Cell_Division_and_Cell_Cycle	Two_cell_division_clusters_relating_to_chromosome_partitioning	Signal_recognition_particle_subunit_Ffh_SRP54_(TC_3.A.5.1.1)	3.94464	4.20111	0.00182522	0.032367
k119_360947	cellular organisms	Cell_Division_and_Cell_Cycle	Two_cell_division_clusters_relating_to_chromosome_partitioning	Signal_recognition_particle_subunit_Ffh_SRP54_(TC_3.A.5.1.1)	7.81051	3.14262	0.00347775	0.044474
k119_389399	Bacteria	Cell_Wall_and_Capsule	Biosynthesis_of_Arabinogalactan_in_Mycobacteria	UDP_galactopyranose_mutase_(EC_5.4.99.9)	3.99669	5.20506	0.0025557	0.0382218
k119_274522	Bacteria	Cell_Wall_and_Capsule	Biosynthesis_of_Arabinogalactan_in_Mycobacteria	UDP_galactopyranose_mutase_(EC_5.4.99.9)	2.50323	4.24679	0.00976947	0.0748729
k119_126142	Actinobacteria	Cell_Wall_and_Capsule	Biosynthesis_of_Arabinogalactan_in_Mycobacteria	UDP_galactopyranose_mutase_(EC_5.4.99.9)	3.28069	3.3625	0.0159989	0.097503
k119_127767	Nitrolancea hollandica	Cell_Wall_and_Capsule	Capsular_heptose_biosynthesis	Phosphoheptose_isomerase_1_(EC_5.3.1._)	2.42868	4.77503	0.0161173	0.0978772
k119_541039	Actinobacteria	Cell_Wall_and_Capsule	Capsular_heptose_biosynthesis	Phosphoheptose_isomerase_1_(EC_5.3.1._)	4.58305	4.67671	0.00491208	0.0526429
k119_299429	Candidatus Nitrososphaera gargensis Ga9.2	Cell_Wall_and_Capsule	CMP_N_acetylneuraminate_Biosynthesis	UDP_N_acetylglucosamine_2_epimerase_(EC_5.1.3.14)	2.70573	4.76447	0.009405	0.0734644
k119_306318	cellular organisms	Cell_Wall_and_Capsule	CMP_N_acetylneuraminate_Biosynthesis	UDP_N_acetylglucosamine_2_epimerase_(EC_5.1.3.14)	4.83271	4.48739	0.00328911	0.0432235
k119_373708	Bacteria	Cell_Wall_and_Capsule	dTDP_rhamnose_synthesis	dTDP_4_dehydrorhamnose_reductase_(EC_1.1.1.133)	8.58471	5.45237	0.00112434	0.0254931
k119_248470	Bacteria	Cell_Wall_and_Capsule	dTDP_rhamnose_synthesis	dTDP_4_dehydrorhamnose_reductase_(EC_1.1.1.133)	2.17926	4.09251	0.0125577	0.085461
k119_145074	Bacteria	Cell_Wall_and_Capsule	dTDP_rhamnose_synthesis	dTDP_glucose_46_dehydratase_(EC_4.2.1.46)	2.27235	4.89812	0.00334499	0.0435935
k119_455618	Bacteria	Cell_Wall_and_Capsule	dTDP_rhamnose_synthesis	Glucose_1_phosphate_thymidylyltransferase_(EC_2.7.7.24)	5.35454	3.66087	0.00319682	0.0426016
k119_523126	Rubrobacter xylanophilus	Cell_Wall_and_Capsule	Exopolysaccharide_Biosynthesis	Tyrosine_protein_kinase_EpsD_(EC_2.7.10.2)	2.48797	4.91343	0.00388934	0.0467977
k119_557916	Rubrobacter xylanophilus	Cell_Wall_and_Capsule	Exopolysaccharide_Biosynthesis	Tyrosine_protein_kinase_EpsD_(EC_2.7.10.2)	2.99083	4.5877	0.00625668	0.059671
k119_548388	Rubrobacter	Cell_Wall_and_Capsule	Exopolysaccharide_Biosynthesis	Undecaprenyl_phosphate_galactosephosphotransferase_(EC_2.7.8.6)	4.21582	5.50707	0.000712649	0.0203009
k119_39085	Rubrobacter aplysinae	Cell_Wall_and_Capsule	Exopolysaccharide_Biosynthesis	Undecaprenyl_phosphate_galactosephosphotransferase_(EC_2.7.8.6)	2.58707	5.21941	0.00114498	0.0257596
k119_515727	Actinobacteria	Cell_Wall_and_Capsule	Exopolysaccharide_Biosynthesis	Undecaprenyl_phosphate_galactosephosphotransferase_(EC_2.7.8.6)	2.76508	5.19355	0.00388216	0.0467696
k119_157396	Rubrobacter aplysinae	Cell_Wall_and_Capsule	Exopolysaccharide_Biosynthesis	Undecaprenyl_phosphate_galactosephosphotransferase_(EC_2.7.8.6)	2.83803	4.42814	0.00688095	0.0626926
k119_99029	cellular organisms	Cell_Wall_and_Capsule	KDO2_Lipid_A_biosynthesis	Lipid_A_export_ATP_binding/permease_protein_MsbA	3.5869	5.00497	0.00965699	0.0744645
k119_281627	Rubrobacter	Cell_Wall_and_Capsule	KDO2_Lipid_A_biosynthesis	Lipid_A_export_ATP_binding/permease_protein_MsbA	4.80614	4.74914	0.000856367	0.0223648
k119_425363	Rubrobacter	Cell_Wall_and_Capsule	Legionaminic_Acid_Biosynthesis	UDP_N_acetylglucosamine_46_dehydratase_(EC_4.2.1._)	3.84892	4.6933	0.00259474	0.0384934
k119_547140	Rubrobacter xylanophilus DSM 9941	Cell_Wall_and_Capsule	Legionaminic_Acid_Biosynthesis	UDP_N_acetylglucosamine_46_dehydratase_(EC_4.2.1._)	5.58644	3.88991	0.00113998	0.0256979
k119_427645	Thaumarchaeota	Cell_Wall_and_Capsule	Lipopolysaccharide_assembly	HtrA_protease/chaperone_protein	4.72068	4.73842	0.00134698	0.0277525
k119_388167	Alphaproteobacteria	Cell_Wall_and_Capsule	Murein_Hydrolases	D_alanyl_D_alanine_carboxypeptidase_(EC_3.4.16.4)	2.7347	4.87245	0.008788	0.0711126
k119_187793	Rubrobacter	Cell_Wall_and_Capsule	Murein_Hydrolases	Soluble_lytic_murein_transglycosylase_precursor_(EC_3.2.1._)	2.18425	4.66956	0.00766708	0.0663865
k119_26539	Bacteria	Cell_Wall_and_Capsule	mycolic_acid_synthesis	3_oxoacyl_[acyl_carrier_protein]_reductase_(EC_1.1.1.100)	5.00093	6.05954	0.000152831	0.00865448
k119_78122	Bacteria	Cell_Wall_and_Capsule	mycolic_acid_synthesis	3_oxoacyl_[acyl_carrier_protein]_reductase_(EC_1.1.1.100)	4.76483	5.59286	0.00063853	0.0191113
k119_212539	Actinobacteria	Cell_Wall_and_Capsule	mycolic_acid_synthesis	3_oxoacyl_[acyl_carrier_protein]_reductase_(EC_1.1.1.100)	5.4245	5.41435	0.00137881	0.0281452
k119_404596	Bacteria	Cell_Wall_and_Capsule	mycolic_acid_synthesis	3_oxoacyl_[acyl_carrier_protein]_reductase_(EC_1.1.1.100)	2.83387	5.33981	0.000953809	0.0236117
k119_326844	Rubrobacter aplysinae	Cell_Wall_and_Capsule	mycolic_acid_synthesis	3_oxoacyl_[acyl_carrier_protein]_reductase_(EC_1.1.1.100)	3.41691	5.30761	0.00114769	0.0257719
k119_114077	Bacteria	Cell_Wall_and_Capsule	mycolic_acid_synthesis	3_oxoacyl_[acyl_carrier_protein]_reductase_(EC_1.1.1.100)	2.7141	5.30634	0.00159952	0.0302467
k119_141056	Rubrobacter xylanophilus	Cell_Wall_and_Capsule	mycolic_acid_synthesis	3_oxoacyl_[acyl_carrier_protein]_reductase_(EC_1.1.1.100)	2.68295	5.17016	0.00329919	0.0432713
k119_97150	cellular organisms	Cell_Wall_and_Capsule	mycolic_acid_synthesis	3_oxoacyl_[acyl_carrier_protein]_reductase_(EC_1.1.1.100)	3.22617	5.1575	0.00148976	0.0293323
k119_144907	Actinobacteria <phylum>	Cell_Wall_and_Capsule	mycolic_acid_synthesis	3_oxoacyl_[acyl_carrier_protein]_reductase_(EC_1.1.1.100)	3.08301	4.90501	0.00803587	0.067998
k119_12320	Bacteria	Cell_Wall_and_Capsule	mycolic_acid_synthesis	3_oxoacyl_[acyl_carrier_protein]_reductase_(EC_1.1.1.100)	2.10273	4.88991	0.00882345	0.0712724
k119_67931	Actinobacteria <phylum>	Cell_Wall_and_Capsule	mycolic_acid_synthesis	3_oxoacyl_[acyl_carrier_protein]_reductase_(EC_1.1.1.100)	2.30027	4.84488	0.00396478	0.0473704
k119_463793	Bacteria	Cell_Wall_and_Capsule	mycolic_acid_synthesis	3_oxoacyl_[acyl_carrier_protein]_reductase_(EC_1.1.1.100)	3.0643	4.73338	0.012047	0.0836045
k119_23753	cellular organisms	Cell_Wall_and_Capsule	mycolic_acid_synthesis	3_oxoacyl_[acyl_carrier_protein]_reductase_(EC_1.1.1.100)	3.11549	4.73222	0.00813245	0.0684206
k119_14157	Rubrobacter	Cell_Wall_and_Capsule	mycolic_acid_synthesis	3_oxoacyl_[acyl_carrier_protein]_reductase_(EC_1.1.1.100)	3.00156	4.71459	0.00260536	0.0385586
k119_507714	Bacteria	Cell_Wall_and_Capsule	mycolic_acid_synthesis	3_oxoacyl_[acyl_carrier_protein]_reductase_(EC_1.1.1.100)	2.97056	4.70889	0.00236378	0.0368889
k119_414664	Bacteria	Cell_Wall_and_Capsule	mycolic_acid_synthesis	3_oxoacyl_[acyl_carrier_protein]_reductase_(EC_1.1.1.100)	2.10747	4.63221	0.00480826	0.0521771
k119_346305	Cyanobacteria	Cell_Wall_and_Capsule	mycolic_acid_synthesis	3_oxoacyl_[acyl_carrier_protein]_reductase_(EC_1.1.1.100)	5.21912	4.55472	0.000927638	0.0232975
k119_526599	Rubrobacter	Cell_Wall_and_Capsule	mycolic_acid_synthesis	3_oxoacyl_[acyl_carrier_protein]_reductase_(EC_1.1.1.100)	2.50345	4.54781	0.00369161	0.0456548
k119_97899	Corynebacteriales	Cell_Wall_and_Capsule	mycolic_acid_synthesis	3_oxoacyl_[acyl_carrier_protein]_reductase_(EC_1.1.1.100)	3.13837	4.54027	0.0108531	0.0788951
k119_457641	cellular organisms	Cell_Wall_and_Capsule	mycolic_acid_synthesis	3_oxoacyl_[acyl_carrier_protein]_reductase_(EC_1.1.1.100)	7.01314	4.40766	0.00101229	0.0242614
k119_362185	Solirubrobacterales	Cell_Wall_and_Capsule	mycolic_acid_synthesis	3_oxoacyl_[acyl_carrier_protein]_reductase_(EC_1.1.1.100)	6.89336	4.37822	0.00347834	0.044474
k119_244646	Corynebacteriales	Cell_Wall_and_Capsule	mycolic_acid_synthesis	3_oxoacyl_[acyl_carrier_protein]_reductase_(EC_1.1.1.100)	2.55965	4.35729	0.00653213	0.0610916
k119_581709	Rubrobacter	Cell_Wall_and_Capsule	mycolic_acid_synthesis	3_oxoacyl_[acyl_carrier_protein]_reductase_(EC_1.1.1.100)	4.13435	4.32456	0.00238024	0.0370411
k119_195418	Terrabacteria group	Cell_Wall_and_Capsule	mycolic_acid_synthesis	3_oxoacyl_[acyl_carrier_protein]_reductase_(EC_1.1.1.100)	4.75697	4.27491	0.0106351	0.0780782
k119_259451	Terrabacteria group	Cell_Wall_and_Capsule	mycolic_acid_synthesis	3_oxoacyl_[acyl_carrier_protein]_reductase_(EC_1.1.1.100)	4.28306	4.23234	0.00370789	0.045738
k119_264972	Rubrobacter	Cell_Wall_and_Capsule	mycolic_acid_synthesis	3_oxoacyl_[acyl_carrier_protein]_reductase_(EC_1.1.1.100)	2.73321	4.15311	0.0131926	0.0877771
k119_416485	Rubrobacter	Cell_Wall_and_Capsule	mycolic_acid_synthesis	3_oxoacyl_[acyl_carrier_protein]_reductase_(EC_1.1.1.100)	2.92577	4.14872	0.00786922	0.0672285
k119_228713	Rubrobacter	Cell_Wall_and_Capsule	mycolic_acid_synthesis	3_oxoacyl_[acyl_carrier_protein]_reductase_(EC_1.1.1.100)	4.31645	4.1436	0.00200702	0.033992
k119_166913	Rubrobacter	Cell_Wall_and_Capsule	mycolic_acid_synthesis	3_oxoacyl_[acyl_carrier_protein]_reductase_(EC_1.1.1.100)	10.3838	4.11305	2.00294e-05	0.0023162
k119_537626	Rubrobacter	Cell_Wall_and_Capsule	mycolic_acid_synthesis	3_oxoacyl_[acyl_carrier_protein]_reductase_(EC_1.1.1.100)	2.15125	3.99655	0.0134233	0.0886496
k119_374151	Rubrobacter radiotolerans	Cell_Wall_and_Capsule	mycolic_acid_synthesis	3_oxoacyl_[acyl_carrier_protein]_reductase_(EC_1.1.1.100)	3.70423	3.78961	0.00513509	0.0539405
k119_514431	Rubrobacter	Cell_Wall_and_Capsule	mycolic_acid_synthesis	3_oxoacyl_[acyl_carrier_protein]_reductase_(EC_1.1.1.100)	3.7486	3.58368	0.0137628	0.0898402
k119_488088	cellular organisms	Cell_Wall_and_Capsule	mycolic_acid_synthesis	3_oxoacyl_[acyl_carrier_protein]_reductase_(EC_1.1.1.100)	3.85663	3.5437	0.00963688	0.0743891
k119_110170	Actinobacteria	Cell_Wall_and_Capsule	mycolic_acid_synthesis	3_oxoacyl_[acyl_carrier_protein]_reductase_(EC_1.1.1.100)	4.93297	3.21975	0.0104902	0.0776598
k119_472594	Bacteria	Cell_Wall_and_Capsule	mycolic_acid_synthesis	3_oxoacyl_[acyl_carrier_protein]_reductase_(EC_1.1.1.100)	6.14961	3.17842	0.0103184	0.0769778
k119_476622	Actinobacteria	Cell_Wall_and_Capsule	mycolic_acid_synthesis	3_oxoacyl_[acyl_carrier_protein]_reductase_(EC_1.1.1.100)	6.45652	2.97269	0.0139642	0.090633
k119_382589	Rubrobacter	Cell_Wall_and_Capsule	mycolic_acid_synthesis	Acyl_carrier_protein	4.72948	4.58271	0.00365979	0.045551
k119_362185	Solirubrobacterales	Cell_Wall_and_Capsule	mycolic_acid_synthesis	Acyl_carrier_protein	6.89336	4.37822	0.00347834	0.044474
k119_439057	Rubrobacter aplysinae	Cell_Wall_and_Capsule	mycolic_acid_synthesis	Acyl_carrier_protein	4.5271	3.28643	0.00807728	0.0681739
k119_158439	Rubrobacter	Cell_Wall_and_Capsule	mycolic_acid_synthesis	Enoyl_[acyl_carrier_protein]_reductase_[NADH]_(EC_1.3.1.9)	2.61744	4.33185	0.011481	0.0814577
k119_496515	Rubrobacter	Cell_Wall_and_Capsule	mycolic_acid_synthesis	Enoyl_[acyl_carrier_protein]_reductase_[NADH]_(EC_1.3.1.9)	3.52709	4.23941	0.00222385	0.0358551
k119_336083	Rubrobacter	Cell_Wall_and_Capsule	Peptidoglycan_Biosynthesis	D_alanine__D_alanine_ligase_(EC_6.3.2.4)	3.17718	4.97992	0.00505926	0.0535027
k119_17333	Rubrobacter	Cell_Wall_and_Capsule	Peptidoglycan_Biosynthesis	D_alanine__D_alanine_ligase_(EC_6.3.2.4)	2.4348	4.42088	0.00507574	0.0535856
k119_15883	Rubrobacter xylanophilus	Cell_Wall_and_Capsule	Peptidoglycan_Biosynthesis	Multimodular_transpeptidase_transglycosylase_(EC_2.4.1.129)_(EC_3.4._._)	3.46083	5.19748	0.00386917	0.0467563
k119_581600	Rubrobacter	Cell_Wall_and_Capsule	Peptidoglycan_Biosynthesis	Multimodular_transpeptidase_transglycosylase_(EC_2.4.1.129)_(EC_3.4._._)	2.85183	5.04523	0.0068348	0.0625263
k119_65597	Rubrobacter	Cell_Wall_and_Capsule	Peptidoglycan_Biosynthesis	Multimodular_transpeptidase_transglycosylase_(EC_2.4.1.129)_(EC_3.4._._)	6.87838	4.66445	0.00326112	0.043047
k119_380144	Rubrobacter	Cell_Wall_and_Capsule	Peptidoglycan_Biosynthesis	Multimodular_transpeptidase_transglycosylase_(EC_2.4.1.129)_(EC_3.4._._)	3.30686	4.59371	0.0116376	0.0820327
k119_173708	Nocardioidaceae	Cell_Wall_and_Capsule	Peptidoglycan_Biosynthesis	Multimodular_transpeptidase_transglycosylase_(EC_2.4.1.129)_(EC_3.4._._)	2.73934	4.58169	0.00262784	0.0386646
k119_268302	Nocardioides	Cell_Wall_and_Capsule	Peptidoglycan_Biosynthesis	Multimodular_transpeptidase_transglycosylase_(EC_2.4.1.129)_(EC_3.4._._)	3.08547	4.5238	0.00356465	0.0450078
k119_445698	Rubrobacter	Cell_Wall_and_Capsule	Peptidoglycan_Biosynthesis	Multimodular_transpeptidase_transglycosylase_(EC_2.4.1.129)_(EC_3.4._._)	3.18991	4.40582	0.00443624	0.0501651
k119_504685	Actinobacteria	Cell_Wall_and_Capsule	Peptidoglycan_Biosynthesis	Multimodular_transpeptidase_transglycosylase_(EC_2.4.1.129)_(EC_3.4._._)	2.3614	4.31589	0.0123222	0.0845205
k119_402350	Rubrobacter	Cell_Wall_and_Capsule	Peptidoglycan_Biosynthesis	Multimodular_transpeptidase_transglycosylase_(EC_2.4.1.129)_(EC_3.4._._)	2.36366	3.70414	0.0158356	0.0969394
k119_434734	Rubrobacter	Cell_Wall_and_Capsule	Peptidoglycan_Biosynthesis	N_acetylglucosamine_1_phosphate_uridyltransferase_(EC_2.7.7.23)	2.9954	4.18211	0.0154485	0.0956396
k119_411055	Rubrobacter	Cell_Wall_and_Capsule	Peptidoglycan_Biosynthesis	N_acetylglucosamine_1_phosphate_uridyltransferase_(EC_2.7.7.23)	2.67798	3.96781	0.0103581	0.0771418
k119_120383	Rubrobacter	Cell_Wall_and_Capsule	Peptidoglycan_Biosynthesis	N_acetylglucosamine_1_phosphate_uridyltransferase_(EC_2.7.7.23)	4.42833	3.93909	0.00255489	0.0382218
k119_173941	Rubrobacter	Cell_Wall_and_Capsule	Peptidoglycan_Biosynthesis	N_acetylglucosamine_1_phosphate_uridyltransferase_(EC_2.7.7.23)	5.2985	3.31834	0.0102617	0.0768243
k119_535082	Rubrobacter xylanophilus	Cell_Wall_and_Capsule	Peptidoglycan_Biosynthesis	Phospho_N_acetylmuramoyl_pentapeptide_transferase_(EC_2.7.8.13)	7.6576	5.91827	0.000134284	0.00803646
k119_440395	Actinobacteria	Cell_Wall_and_Capsule	Peptidoglycan_Biosynthesis	Phospho_N_acetylmuramoyl_pentapeptide_transferase_(EC_2.7.8.13)	4.64985	5.64868	0.00298945	0.0411433
k119_468489	Rubrobacter	Cell_Wall_and_Capsule	Peptidoglycan_Biosynthesis	Phospho_N_acetylmuramoyl_pentapeptide_transferase_(EC_2.7.8.13)	3.60243	3.90539	0.0161587	0.0980496
k119_283103	Rubrobacter	Cell_Wall_and_Capsule	Peptidoglycan_Biosynthesis	Rare_lipoprotein_A_precursor	3.83915	4.44174	0.00583702	0.0575243
k119_81220	Rubrobacter	Cell_Wall_and_Capsule	Peptidoglycan_Biosynthesis	UDP_N_acetylglucosamine__N_acetylmuramyl_(pentapeptide)_pyrophosphoryl_undecaprenol_N_acetylglucosamine_transferase_(EC_2.4.1.227)	3.92923	3.6898	0.0127676	0.0863093
k119_575065	Actinobacteria	Cell_Wall_and_Capsule	Peptidoglycan_Biosynthesis	UDP_N_acetylglucosamine_1_carboxyvinyltransferase_(EC_2.5.1.7)	2.32215	4.80383	0.0100899	0.0761651
k119_535082	Rubrobacter xylanophilus	Cell_Wall_and_Capsule	Peptidoglycan_Biosynthesis	UDP_N_acetylmuramoylalanine__D_glutamate_ligase_(EC_6.3.2.9)	7.6576	5.91827	0.000134284	0.00803646
k119_38480	Rubrobacter	Cell_Wall_and_Capsule	Peptidoglycan_Biosynthesis	UDP_N_acetylmuramoylalanyl_D_glutamate__26_diaminopimelate_ligase_(EC_6.3.2.13)	4.02622	4.81731	0.00421748	0.0488799
k119_33434	Proteobacteria	Cell_Wall_and_Capsule	Phosphorylcholine_incorporation_in_LPS	Choline_kinase_(EC_2.7.1.32)	3.05112	5.00176	0.00666276	0.0617027
k119_588024	Proteobacteria	Cell_Wall_and_Capsule	Phosphorylcholine_incorporation_in_LPS	Choline_kinase_(EC_2.7.1.32)	3.97111	4.68641	0.00545628	0.0555434
k119_514965	Proteobacteria	Cell_Wall_and_Capsule	Phosphorylcholine_incorporation_in_LPS	Choline_kinase_(EC_2.7.1.32)	2.96305	4.42062	0.00503891	0.0533981
k119_2514	Proteobacteria	Cell_Wall_and_Capsule	Phosphorylcholine_incorporation_in_LPS	Choline_kinase_(EC_2.7.1.32)	2.24052	4.21972	0.00644359	0.0605703
k119_243816	Alphaproteobacteria	Cell_Wall_and_Capsule	Phosphorylcholine_incorporation_in_LPS	Choline_kinase_(EC_2.7.1.32)	2.36989	4.07998	0.0122061	0.0840519
k119_572244	Rhizobiales	Cell_Wall_and_Capsule	Phosphorylcholine_incorporation_in_LPS	Choline_kinase_(EC_2.7.1.32)	3.13404	3.42755	0.0167254	0.0999523
k119_50084	Bacteria	Cell_Wall_and_Capsule	Rhamnose_containing_glycans	capsular_polysaccharide_biosynthesis_protein	2.347	5.00374	0.00661625	0.0614815
k119_375778	Rubrobacter xylanophilus	Cell_Wall_and_Capsule	Rhamnose_containing_glycans	Teichoic_acid_export_ATP_binding_protein_TagH_(EC_3.6.3.40)	2.54178	4.18764	0.0115526	0.0818004
k119_1282	Rubrobacter xylanophilus	Cell_Wall_and_Capsule	Rhamnose_containing_glycans	Teichoic_acid_export_ATP_binding_protein_TagH_(EC_3.6.3.40)	4.38802	4.09045	0.00182211	0.0323427
k119_228966	Rubrobacter xylanophilus DSM 9941	Cell_Wall_and_Capsule	Sortase	Sortase_A_LPXTG_specific	3.36611	4.90757	0.00126439	0.0268405
k119_491272	Rubrobacter	Cell_Wall_and_Capsule	Sortase	Sortase_A_LPXTG_specific	2.769	4.78787	0.00188962	0.0329357
k119_194047	Rubrobacter	Cell_Wall_and_Capsule	Sortase	Sortase_A_LPXTG_specific	2.73731	4.77554	0.0134359	0.0886957
k119_326237	Rubrobacter	Cell_Wall_and_Capsule	Sortase	Sortase_A_LPXTG_specific	2.39242	4.71569	0.00958662	0.0741541
k119_495203	Rubrobacter xylanophilus	Cell_Wall_and_Capsule	Sortase	Sortase_A_LPXTG_specific	3.02174	4.45762	0.00966484	0.074494
k119_55827	Rubrobacter	Cell_Wall_and_Capsule	Sortase	Sortase_A_LPXTG_specific	2.3396	4.35268	0.0157492	0.0965863
k119_172963	Rubrobacter xylanophilus	Cell_Wall_and_Capsule	Sortase	Sortase_A_LPXTG_specific	2.89558	4.3207	0.00353233	0.0447869
k119_267070	Rubrobacter	Cell_Wall_and_Capsule	Sortase	Sortase_A_LPXTG_specific	5.55376	4.27774	0.00210949	0.034856
k119_298179	Rubrobacter	Cell_Wall_and_Capsule	Sortase	Sortase_A_LPXTG_specific	4.81765	3.92365	0.0016996	0.0311737
k119_152065	Rubrobacter radiotolerans	Cell_Wall_and_Capsule	Sortase	Sortase_A_LPXTG_specific	4.51963	3.89077	0.00742574	0.0653079
k119_315368	Rubrobacter	Cell_Wall_and_Capsule	Sortase	Sortase_A_LPXTG_specific	4.19341	3.8857	0.00489214	0.0525808
k119_170824	Rubrobacter xylanophilus	Cell_Wall_and_Capsule	Sortase	Sortase_A_LPXTG_specific	4.39548	3.49957	0.00538389	0.0552374
k119_240808	Rubrobacter	Cell_Wall_and_Capsule	Sortase	Sortase_A_LPXTG_specific	11.55	3.44132	0.000427076	0.0154609
k119_536946	Rubrobacter xylanophilus	Cell_Wall_and_Capsule	Sortase	Sortase_A_LPXTG_specific	4.89304	3.04784	0.0124002	0.0848305
k119_228966	Rubrobacter xylanophilus DSM 9941	Cell_Wall_and_Capsule	Sortase		3.36611	4.90757	0.00126439	0.0268405
k119_491272	Rubrobacter	Cell_Wall_and_Capsule	Sortase		2.769	4.78787	0.00188962	0.0329357
k119_194047	Rubrobacter	Cell_Wall_and_Capsule	Sortase		2.73731	4.77554	0.0134359	0.0886957
k119_326237	Rubrobacter	Cell_Wall_and_Capsule	Sortase		2.39242	4.71569	0.00958662	0.0741541
k119_495203	Rubrobacter xylanophilus	Cell_Wall_and_Capsule	Sortase		3.02174	4.45762	0.00966484	0.074494
k119_55827	Rubrobacter	Cell_Wall_and_Capsule	Sortase		2.3396	4.35268	0.0157492	0.0965863
k119_172963	Rubrobacter xylanophilus	Cell_Wall_and_Capsule	Sortase		2.89558	4.3207	0.00353233	0.0447869
k119_267070	Rubrobacter	Cell_Wall_and_Capsule	Sortase		5.55376	4.27774	0.00210949	0.034856
k119_298179	Rubrobacter	Cell_Wall_and_Capsule	Sortase		4.81765	3.92365	0.0016996	0.0311737
k119_152065	Rubrobacter radiotolerans	Cell_Wall_and_Capsule	Sortase		4.51963	3.89077	0.00742574	0.0653079
k119_315368	Rubrobacter	Cell_Wall_and_Capsule	Sortase		4.19341	3.8857	0.00489214	0.0525808
k119_170824	Rubrobacter xylanophilus	Cell_Wall_and_Capsule	Sortase		4.39548	3.49957	0.00538389	0.0552374
k119_240808	Rubrobacter	Cell_Wall_and_Capsule	Sortase		11.55	3.44132	0.000427076	0.0154609
k119_536946	Rubrobacter xylanophilus	Cell_Wall_and_Capsule	Sortase		4.89304	3.04784	0.0124002	0.0848305
k119_260257	Clostridia	Cell_Wall_and_Capsule	Teichoic_and_lipoteichoic_acids_biosynthesis	diglucosyldiacylglycerol_synthase_(LTA_membrane_anchor_synthesis)	2.83663	4.45796	0.00690211	0.0627954
k119_355949	Actinobacteria	Cell_Wall_and_Capsule	Teichoic_and_lipoteichoic_acids_biosynthesis	Undecaprenyl_phosphate_N_acetylglucosaminyl_1_phosphate_transferase_(EC_2.7.8._)	2.26118	5.19193	0.00302124	0.0413965
k119_534926	Actinobacteria	Cell_Wall_and_Capsule	Teichoic_and_lipoteichoic_acids_biosynthesis	Undecaprenyl_phosphate_N_acetylglucosaminyl_1_phosphate_transferase_(EC_2.7.8._)	2.41088	4.50885	0.0135084	0.088965
k119_358259	Rubrobacter aplysinae	Cell_Wall_and_Capsule	tRNA_dependent_amino_acid_transfers	tRNA_dependent_lipid_II__amino_acid_ligase	3.11985	5.24048	0.00111548	0.0253607
k119_171539	Terrabacteria group	Cell_Wall_and_Capsule	tRNA_dependent_amino_acid_transfers	tRNA_dependent_lipid_II__amino_acid_ligase	3.34644	4.67168	0.00263552	0.0387145
k119_331462	Terrabacteria group	Cell_Wall_and_Capsule	tRNA_dependent_amino_acid_transfers	tRNA_dependent_lipid_II__amino_acid_ligase	2.51804	4.32048	0.00843836	0.0695376
k119_224353	Terrabacteria group	Cell_Wall_and_Capsule	tRNA_dependent_amino_acid_transfers	tRNA_dependent_lipid_II__amino_acid_ligase	4.1295	3.69289	0.00464285	0.0512593
k119_55530	Rubrobacter xylanophilus	Cell_Wall_and_Capsule	Vibrio_Polysaccharide_(VPS)_Biosynthesis	Low_molecular_weight_protein_tyrosine_phosphatase_(EC_3.1.3.48)	3.99169	5.636	0.00115006	0.0258044
k119_378927	Rubrobacter	Cell_Wall_and_Capsule	YjeE	CBS_domain_protein_sometimes_clustered_with_YjeE	4.02956	4.42675	0.00181986	0.0323184
k119_482845	Solirubrobacterales	Cell_Wall_and_Capsule	YjeE	NAD(P)HX_dehydratase	3.7077	4.84061	0.0112668	0.0806989
k119_32032	Rubrobacter	Central_metabolism	EC_6.4.1.__Ligases_that_form_carbon_carbon_bonds	Acetyl_coenzyme_A_carboxyl_transferase_beta_chain_(EC_6.4.1.2)	4.20646	4.56464	0.00509477	0.0536975
k119_370253	Actinobacteria <phylum>	Cofactors_Vitamins_Prosthetic_Groups_Pigments	5_FCL_like_protein		8.2892	6.71867	1.37896e-05	0.00181706
k119_201529	Cyanobacteria	Cofactors_Vitamins_Prosthetic_Groups_Pigments	5_FCL_like_protein		6.39364	6.11401	0.000232771	0.0110606
k119_267803	Bacillales	Cofactors_Vitamins_Prosthetic_Groups_Pigments	5_FCL_like_protein		5.51912	6.0163	0.000602193	0.0185226
k119_212340	Bacteria	Cofactors_Vitamins_Prosthetic_Groups_Pigments	5_FCL_like_protein		4.35809	5.80281	0.00185496	0.0325971
k119_520101	Bacteria candidate phyla	Cofactors_Vitamins_Prosthetic_Groups_Pigments	5_FCL_like_protein		4.74829	5.74952	0.0027598	0.0395295
k119_410402	Rubrobacter radiotolerans	Cofactors_Vitamins_Prosthetic_Groups_Pigments	5_FCL_like_protein		4.19368	5.69911	0.000415878	0.0152359
k119_31430	Actinobacteria	Cofactors_Vitamins_Prosthetic_Groups_Pigments	5_FCL_like_protein		4.13634	5.57896	0.000546769	0.0174829
k119_186580	Bacteria	Cofactors_Vitamins_Prosthetic_Groups_Pigments	5_FCL_like_protein		3.86309	5.55527	0.000661265	0.0193801
k119_401048	Bacteria	Cofactors_Vitamins_Prosthetic_Groups_Pigments	5_FCL_like_protein		6.27029	5.3305	0.00277983	0.0396397
k119_454897	Bacteria	Cofactors_Vitamins_Prosthetic_Groups_Pigments	5_FCL_like_protein		4.84417	5.32963	0.0019329	0.0334023
k119_14301	Chloroflexi	Cofactors_Vitamins_Prosthetic_Groups_Pigments	5_FCL_like_protein		9.40174	5.21467	0.000111552	0.00713061
k119_414618	Actinobacteria	Cofactors_Vitamins_Prosthetic_Groups_Pigments	5_FCL_like_protein		2.46473	5.19879	0.00209922	0.0348407
k119_451648	Bacteria	Cofactors_Vitamins_Prosthetic_Groups_Pigments	5_FCL_like_protein		3.21986	5.19352	0.00105682	0.0246949
k119_527862	Rubrobacter	Cofactors_Vitamins_Prosthetic_Groups_Pigments	5_FCL_like_protein		4.42901	5.19337	0.00234664	0.0367456
k119_392629	Actinobacteria	Cofactors_Vitamins_Prosthetic_Groups_Pigments	5_FCL_like_protein		4.46493	5.13563	0.0069945	0.0632234
k119_530404	cellular organisms	Cofactors_Vitamins_Prosthetic_Groups_Pigments	5_FCL_like_protein		2.97611	5.12955	0.00466916	0.0514192
k119_499002	cellular organisms	Cofactors_Vitamins_Prosthetic_Groups_Pigments	5_FCL_like_protein		3.22577	5.11152	0.00358561	0.0450872
k119_393928	Acidobacteria	Cofactors_Vitamins_Prosthetic_Groups_Pigments	5_FCL_like_protein		2.9369	5.05035	0.0156057	0.0961668
k119_136786	Bacteria	Cofactors_Vitamins_Prosthetic_Groups_Pigments	5_FCL_like_protein		5.65575	4.94448	0.00171537	0.0313363
k119_398638	Rubrobacter	Cofactors_Vitamins_Prosthetic_Groups_Pigments	5_FCL_like_protein		2.46597	4.83622	0.00746497	0.0654486
k119_35291	Actinobacteria <phylum>	Cofactors_Vitamins_Prosthetic_Groups_Pigments	5_FCL_like_protein		2.99095	4.80985	0.00278717	0.0397052
k119_423316	Streptosporangiales	Cofactors_Vitamins_Prosthetic_Groups_Pigments	5_FCL_like_protein		4.63143	4.72963	0.00414092	0.0484679
k119_492427	Terrabacteria group	Cofactors_Vitamins_Prosthetic_Groups_Pigments	5_FCL_like_protein		2.22524	4.71517	0.00953905	0.0740419
k119_245908	Terrabacteria group	Cofactors_Vitamins_Prosthetic_Groups_Pigments	5_FCL_like_protein		6.16395	4.7053	0.00152578	0.0295777
k119_23906	Cyanobacteria	Cofactors_Vitamins_Prosthetic_Groups_Pigments	5_FCL_like_protein		2.70705	4.70505	0.00452069	0.0506148
k119_70698	Terrabacteria group	Cofactors_Vitamins_Prosthetic_Groups_Pigments	5_FCL_like_protein		2.83238	4.68596	0.0103855	0.0772603
k119_351684	Bacteria	Cofactors_Vitamins_Prosthetic_Groups_Pigments	5_FCL_like_protein		6.893	4.66222	0.00205405	0.034437
k119_302200	Thaumarchaeota	Cofactors_Vitamins_Prosthetic_Groups_Pigments	5_FCL_like_protein		2.94193	4.63767	0.00837808	0.0692903
k119_275558	Streptosporangiales	Cofactors_Vitamins_Prosthetic_Groups_Pigments	5_FCL_like_protein		2.28529	4.60893	0.0121959	0.0840206
k119_430998	Rubrobacter aplysinae	Cofactors_Vitamins_Prosthetic_Groups_Pigments	5_FCL_like_protein		4.45613	4.55293	0.0016487	0.03075
k119_46195	Actinobacteria	Cofactors_Vitamins_Prosthetic_Groups_Pigments	5_FCL_like_protein		3.01609	4.53322	0.00732411	0.0648386
k119_542109	Actinobacteria	Cofactors_Vitamins_Prosthetic_Groups_Pigments	5_FCL_like_protein		3.05458	4.31591	0.00779984	0.0669798
k119_228021	Terrabacteria group	Cofactors_Vitamins_Prosthetic_Groups_Pigments	5_FCL_like_protein		6.41915	4.28794	0.000280054	0.0122815
k119_452033	Bacteria	Cofactors_Vitamins_Prosthetic_Groups_Pigments	5_FCL_like_protein		3.93632	4.27906	0.0162381	0.0982663
k119_280837	Terrabacteria group	Cofactors_Vitamins_Prosthetic_Groups_Pigments	5_FCL_like_protein		3.65896	4.19382	0.00379828	0.0463278
k119_505757	Rubrobacter aplysinae	Cofactors_Vitamins_Prosthetic_Groups_Pigments	5_FCL_like_protein		2.32609	4.15154	0.0166686	0.0997899
k119_574363	cellular organisms	Cofactors_Vitamins_Prosthetic_Groups_Pigments	5_FCL_like_protein		4.83253	4.14233	0.0054574	0.0555468
k119_511303	Rubrobacter radiotolerans	Cofactors_Vitamins_Prosthetic_Groups_Pigments	5_FCL_like_protein		4.46284	4.09308	0.00285219	0.04016
k119_553876	Rubrobacter	Cofactors_Vitamins_Prosthetic_Groups_Pigments	5_FCL_like_protein		2.16245	4.06144	0.010048	0.0759844
k119_368688	Rubrobacter	Cofactors_Vitamins_Prosthetic_Groups_Pigments	5_FCL_like_protein		2.64924	4.03699	0.00893722	0.0715888
k119_536543	Streptosporangiales	Cofactors_Vitamins_Prosthetic_Groups_Pigments	5_FCL_like_protein		3.24387	3.97275	0.00958102	0.0741541
k119_457101	Nocardioidaceae	Cofactors_Vitamins_Prosthetic_Groups_Pigments	5_FCL_like_protein		3.81599	3.95739	0.00722452	0.0643554
k119_332045	Actinobacteria	Cofactors_Vitamins_Prosthetic_Groups_Pigments	5_FCL_like_protein		6.11794	3.91712	0.00321455	0.0427129
k119_484433	Rubrobacter	Cofactors_Vitamins_Prosthetic_Groups_Pigments	5_FCL_like_protein		4.44993	3.84476	0.0117093	0.0822904
k119_216134	Actinobacteria <phylum>	Cofactors_Vitamins_Prosthetic_Groups_Pigments	5_FCL_like_protein		3.81194	3.83924	0.00539076	0.0552464
k119_558196	Rubrobacter	Cofactors_Vitamins_Prosthetic_Groups_Pigments	5_FCL_like_protein		3.69658	3.82732	0.00300803	0.0412997
k119_309961	Rubrobacter	Cofactors_Vitamins_Prosthetic_Groups_Pigments	5_FCL_like_protein		2.60638	3.82727	0.0140289	0.0908465
k119_115272	Geodermatophilaceae	Cofactors_Vitamins_Prosthetic_Groups_Pigments	5_FCL_like_protein		4.26467	3.75441	0.00969015	0.074527
k119_336744	Actinobacteria <phylum>	Cofactors_Vitamins_Prosthetic_Groups_Pigments	5_FCL_like_protein		2.98301	3.72113	0.0165051	0.0992054
k119_217402	Rubrobacter	Cofactors_Vitamins_Prosthetic_Groups_Pigments	5_FCL_like_protein		2.80026	3.697	0.014719	0.0931044
k119_300898	Actinobacteria <phylum>	Cofactors_Vitamins_Prosthetic_Groups_Pigments	5_FCL_like_protein		3.94146	3.68638	0.00375746	0.0460225
k119_536319	Nocardioidaceae	Cofactors_Vitamins_Prosthetic_Groups_Pigments	5_FCL_like_protein		4.42633	3.54223	0.0136737	0.0895194
k119_235594	Bacteria	Cofactors_Vitamins_Prosthetic_Groups_Pigments	5_FCL_like_protein		11.1518	3.49212	0.00264813	0.0387864
k119_73450	Actinobacteria	Cofactors_Vitamins_Prosthetic_Groups_Pigments	5_FCL_like_protein		4.70617	3.40109	0.0135858	0.0892669
k119_184821	Rubrobacter	Cofactors_Vitamins_Prosthetic_Groups_Pigments	5_FCL_like_protein		4.21759	3.2174	0.012568	0.0855094
k119_288146	Rubrobacter	Cofactors_Vitamins_Prosthetic_Groups_Pigments	B12_Biosynthesis_(Tavares_copy1)	Cobalt_precorrin_2_C20_methyltransferase_(EC_2.1.1.130)	4.26571	5.40687	0.00452121	0.0506148
k119_228522	Rubrobacter xylanophilus	Cofactors_Vitamins_Prosthetic_Groups_Pigments	B12_Biosynthesis_(Tavares_copy1)	Cobalt_precorrin_2_C20_methyltransferase_(EC_2.1.1.130)	2.53205	4.73508	0.0107622	0.0785322
k119_147677	Thaumarchaeota	Cofactors_Vitamins_Prosthetic_Groups_Pigments	B12_Biosynthesis_(Tavares_copy1)	Cobalt_precorrin_4_C11_methyltransferase_(EC_2.1.1.133)	2.46376	4.85927	0.00859851	0.0703552
k119_228522	Rubrobacter xylanophilus	Cofactors_Vitamins_Prosthetic_Groups_Pigments	B12_Biosynthesis_(Tavares_copy1)	Cobalt_precorrin_4_C11_methyltransferase_(EC_2.1.1.133)	2.53205	4.73508	0.0107622	0.0785322
k119_257984	Rubrobacter xylanophilus	Cofactors_Vitamins_Prosthetic_Groups_Pigments	B12_Biosynthesis_(Tavares_copy1)	Cobalt_precorrin_4_C11_methyltransferase_(EC_2.1.1.133)	3.21279	3.63825	0.011194	0.0803782
k119_387742	Nitrososphaera	Cofactors_Vitamins_Prosthetic_Groups_Pigments	B12_Biosynthesis_(Tavares_copy1)	Cobalt_precorrin_6y_C15_methyltransferase_[decarboxylating]_(EC_2.1.1._)	3.41854	5.35183	0.00277045	0.039567
k119_145573	Thaumarchaeota	Cofactors_Vitamins_Prosthetic_Groups_Pigments	B12_Biosynthesis_(Tavares_copy1)	Cobalt_precorrin_6y_C5_methyltransferase_(EC_2.1.1._)	3.62832	4.97294	0.0139268	0.0904681
k119_498445	Rubrobacter	Cofactors_Vitamins_Prosthetic_Groups_Pigments	B12_Biosynthesis_(Tavares_copy1)	CobN_component_of_cobalt_chelatase_involved_in_B12_biosynthesis	4.7794	4.15739	0.0083651	0.0692259
k119_533546	Rubrobacter aplysinae	Cofactors_Vitamins_Prosthetic_Groups_Pigments	B12_Biosynthesis_(Tavares_copy1)	Predicted_cobalt_transporter_CbtA	3.03054	4.52754	0.00445433	0.0502696
k119_160501	Candidatus Nitrososphaera gargensis Ga9.2	Cofactors_Vitamins_Prosthetic_Groups_Pigments	B12_Biosynthesis_(Tavares_copy1)	Predicted_cobalt_transporter_CbtA	3.0752	4.44505	0.00620212	0.0593268
k119_256639	Actinobacteria	Cofactors_Vitamins_Prosthetic_Groups_Pigments	BEY_LIP	Lipoate_synthase	2.56282	4.10208	0.00785527	0.0671987
k119_216826	Bacteria	Cofactors_Vitamins_Prosthetic_Groups_Pigments	BEY_LIP	Pyridoxal_kinase_(EC_2.7.1.35)	3.25579	5.17186	0.00480659	0.0521771
k119_191270	Terrabacteria group	Cofactors_Vitamins_Prosthetic_Groups_Pigments	Biotin_biosynthesis	Adenosylmethionine_8_amino_7_oxononanoate_aminotransferase_(EC_2.6.1.62)	6.23634	4.40095	0.000225897	0.0109289
k119_511074	Bacillus	Cofactors_Vitamins_Prosthetic_Groups_Pigments	Biotin_biosynthesis	Adenosylmethionine_8_amino_7_oxononanoate_aminotransferase_(EC_2.6.1.62)	2.93969	4.24856	0.0083712	0.0692623
k119_7938	Bacteria	Cofactors_Vitamins_Prosthetic_Groups_Pigments	Biotin_biosynthesis	Adenosylmethionine_8_amino_7_oxononanoate_aminotransferase_(EC_2.6.1.62)	3.62015	4.05801	0.0137861	0.0899527
k119_462950	Bacteria	Cofactors_Vitamins_Prosthetic_Groups_Pigments	Biotin_biosynthesis	Long_chain_fatty_acid__CoA_ligase_(EC_6.2.1.3)	3.84251	5.53039	7.12828e-05	0.00538036
k119_408538	Rubrobacter	Cofactors_Vitamins_Prosthetic_Groups_Pigments	Biotin_biosynthesis	Long_chain_fatty_acid__CoA_ligase_(EC_6.2.1.3)	3.80303	5.15336	0.000927468	0.0232975
k119_46969	Rubrobacter	Cofactors_Vitamins_Prosthetic_Groups_Pigments	Biotin_biosynthesis	Long_chain_fatty_acid__CoA_ligase_(EC_6.2.1.3)	2.42828	5.0846	0.00198424	0.0337938
k119_386980	Rubrobacter	Cofactors_Vitamins_Prosthetic_Groups_Pigments	Biotin_biosynthesis	Long_chain_fatty_acid__CoA_ligase_(EC_6.2.1.3)	4.37125	4.86437	0.000383767	0.01458
k119_57043	Terrabacteria group	Cofactors_Vitamins_Prosthetic_Groups_Pigments	Biotin_biosynthesis	Long_chain_fatty_acid__CoA_ligase_(EC_6.2.1.3)	2.59088	4.80751	0.00417744	0.0486891
k119_216924	Rubrobacter	Cofactors_Vitamins_Prosthetic_Groups_Pigments	Biotin_biosynthesis	Long_chain_fatty_acid__CoA_ligase_(EC_6.2.1.3)	3.12631	4.78753	0.00257278	0.0383216
k119_573949	Bacteria	Cofactors_Vitamins_Prosthetic_Groups_Pigments	Biotin_biosynthesis	Long_chain_fatty_acid__CoA_ligase_(EC_6.2.1.3)	2.39194	4.76539	0.00286812	0.0402574
k119_162643	Terrabacteria group	Cofactors_Vitamins_Prosthetic_Groups_Pigments	Biotin_biosynthesis	Long_chain_fatty_acid__CoA_ligase_(EC_6.2.1.3)	2.63964	4.55819	0.00447726	0.050395
k119_254545	Rubrobacter	Cofactors_Vitamins_Prosthetic_Groups_Pigments	Biotin_biosynthesis	Long_chain_fatty_acid__CoA_ligase_(EC_6.2.1.3)	3.47899	4.36853	0.00567457	0.0567348
k119_260321	Terrabacteria group	Cofactors_Vitamins_Prosthetic_Groups_Pigments	Biotin_biosynthesis	Long_chain_fatty_acid__CoA_ligase_(EC_6.2.1.3)	2.33813	4.33853	0.0159658	0.0973735
k119_408722	Cyanobacteria	Cofactors_Vitamins_Prosthetic_Groups_Pigments	Biotin_biosynthesis	Long_chain_fatty_acid__CoA_ligase_(EC_6.2.1.3)	3.0574	4.31694	0.00434667	0.0495592
k119_468707	Bacteria	Cofactors_Vitamins_Prosthetic_Groups_Pigments	Biotin_biosynthesis	Long_chain_fatty_acid__CoA_ligase_(EC_6.2.1.3)	2.96249	4.17276	0.00749251	0.0655894
k119_109411	Bacteria	Cofactors_Vitamins_Prosthetic_Groups_Pigments	Biotin_biosynthesis	Long_chain_fatty_acid__CoA_ligase_(EC_6.2.1.3)	3.51505	4.15719	0.00902434	0.0719669
k119_159843	Rubrobacter	Cofactors_Vitamins_Prosthetic_Groups_Pigments	Biotin_biosynthesis	Long_chain_fatty_acid__CoA_ligase_(EC_6.2.1.3)	2.32375	4.12252	0.0145667	0.0925926
k119_320017	Rubrobacter radiotolerans	Cofactors_Vitamins_Prosthetic_Groups_Pigments	Biotin_biosynthesis	Long_chain_fatty_acid__CoA_ligase_(EC_6.2.1.3)	7.19975	4.09216	0.000882982	0.0227129
k119_247421	Rubrobacter radiotolerans	Cofactors_Vitamins_Prosthetic_Groups_Pigments	Biotin_biosynthesis	Long_chain_fatty_acid__CoA_ligase_(EC_6.2.1.3)	7.54748	3.52485	0.00848713	0.0697606
k119_439057	Rubrobacter aplysinae	Cofactors_Vitamins_Prosthetic_Groups_Pigments	Biotin_biosynthesis	Long_chain_fatty_acid__CoA_ligase_(EC_6.2.1.3)	4.5271	3.28643	0.00807728	0.0681739
k119_584154	Rubrobacter	Cofactors_Vitamins_Prosthetic_Groups_Pigments	Biotin_synthesis_&_utilization	Biotin_carboxylase_of_acetyl_CoA_carboxylase_(EC_6.3.4.14)	3.04712	4.76472	0.00152153	0.0295563
k119_326644	Rubrobacter	Cofactors_Vitamins_Prosthetic_Groups_Pigments	Biotin_synthesis_&_utilization	Biotin_carboxylase_of_acetyl_CoA_carboxylase_(EC_6.3.4.14)	2.21194	4.64547	0.0110559	0.0797427
k119_165855	Rubrobacter	Cofactors_Vitamins_Prosthetic_Groups_Pigments	Biotin_synthesis_&_utilization	Biotin_carboxylase_of_acetyl_CoA_carboxylase_(EC_6.3.4.14)	3.44772	3.53728	0.0105247	0.0777488
k119_197358	Actinobacteria	Cofactors_Vitamins_Prosthetic_Groups_Pigments	Chlorophyll_Biosynthesis_in_plants_and_prokaryotes	Geranylgeranyl_diphosphate_reductase_(EC_1.3.1.83)	2.28258	4.38429	0.0107219	0.0784443
k119_215009	Rhizobiales	Cofactors_Vitamins_Prosthetic_Groups_Pigments	CLO_thiaminPP_biosynthesis	Hydroxymethylpyrimidine_ABC_transporter_transmembrane_component	2.57499	5.07346	0.00242544	0.0372998
k119_564184	Bacteroidetes	Cofactors_Vitamins_Prosthetic_Groups_Pigments	CLO_thiaminPP_biosynthesis	Hydroxymethylpyrimidine_phosphate_synthase_ThiC_(EC_4.1.99.17)	6.12835	2.94407	0.0133966	0.0885604
k119_228090	Rubrobacter	Cofactors_Vitamins_Prosthetic_Groups_Pigments	CLO_thiaminPP_biosynthesis	Sulfur_carrier_protein_adenylyltransferase_ThiF	2.87325	3.87721	0.0160136	0.0975485
k119_237625	Rubrobacter	Cofactors_Vitamins_Prosthetic_Groups_Pigments	coA_FolK	2_amino_4_hydroxy_6_hydroxymethyldihydropteridine_pyrophosphokinase_(EC_2.7.6.3)	2.73545	4.72951	0.00471573	0.0516749
k119_254074	Rubrobacter	Cofactors_Vitamins_Prosthetic_Groups_Pigments	coA_FolK	2_amino_4_hydroxy_6_hydroxymethyldihydropteridine_pyrophosphokinase_(EC_2.7.6.3)	4.40923	4.71945	0.00716169	0.0640706
k119_334044	Rubrobacter	Cofactors_Vitamins_Prosthetic_Groups_Pigments	coA_FolK	2_amino_4_hydroxy_6_hydroxymethyldihydropteridine_pyrophosphokinase_(EC_2.7.6.3)	2.21656	4.70013	0.0133686	0.0884386
k119_357125	Thaumarchaeota	Cofactors_Vitamins_Prosthetic_Groups_Pigments	coA_FolK	Phosphopantothenate_synthetase_archaeal	2.6183	4.84034	0.00675713	0.062235
k119_426011	Thaumarchaeota	Cofactors_Vitamins_Prosthetic_Groups_Pigments	CoA_Pantothenate_HMP	3_methyl_2_oxobutanoate_hydroxymethyltransferase_(EC_2.1.2.11)	2.65223	5.01386	0.00617976	0.0592561
k119_122126	Rubrobacter xylanophilus	Cofactors_Vitamins_Prosthetic_Groups_Pigments	CoA_Pantothenate_HMP	Dephospho_CoA_kinase_(EC_2.7.1.24)	4.18732	4.38623	0.00309149	0.0418934
k119_391409	Rubrobacter xylanophilus DSM 9941	Cofactors_Vitamins_Prosthetic_Groups_Pigments	CoA_Pantothenate_HMP	Dephospho_CoA_kinase_(EC_2.7.1.24)	4.54557	3.93029	0.00179386	0.0320583
k119_458222	Bacteria	Cofactors_Vitamins_Prosthetic_Groups_Pigments	CoA_Pantothenate_HMP	Pantothenate_kinase_(EC_2.7.1.33)	3.45804	4.56671	0.0152604	0.0949793
k119_509238	Rubrobacter	Cofactors_Vitamins_Prosthetic_Groups_Pigments	CoA_Pantothenate_HMP	Phosphopantetheine_adenylyltransferase_(EC_2.7.7.3)	6.39892	4.54006	0.000922794	0.0232093
k119_532888	Rubrobacter xylanophilus	Cofactors_Vitamins_Prosthetic_Groups_Pigments	CoA_Pantothenate_HMP	Phosphopantetheine_adenylyltransferase_(EC_2.7.7.3)	3.15672	4.30376	0.00373371	0.0458837
k119_304869	Rubrobacter aplysinae	Cofactors_Vitamins_Prosthetic_Groups_Pigments	CoA_Pantothenate_HMP	Phosphopantetheine_adenylyltransferase_(EC_2.7.7.3)	3.96249	3.94729	0.00849134	0.0697874
k119_118655	Rubrobacter xylanophilus	Cofactors_Vitamins_Prosthetic_Groups_Pigments	CoA_Pantothenate_HMP	Phosphopantetheine_adenylyltransferase_(EC_2.7.7.3)	4.585	3.48972	0.0113997	0.0810988
k119_490689	Rubrobacter xylanophilus	Cofactors_Vitamins_Prosthetic_Groups_Pigments	CoA_Pantothenate_HMP	Phosphopantetheine_adenylyltransferase_(EC_2.7.7.3)	9.3773	2.40752	0.0152248	0.0948742
k119_233263	Rubrobacter	Cofactors_Vitamins_Prosthetic_Groups_Pigments	Coenzyme_F420_synthesis	78_didemethyl_8_hydroxy_5_deazariboflavin_synthase_subunit_2	2.52614	5.32872	0.000472064	0.0162941
k119_245574	Thaumarchaeota	Cofactors_Vitamins_Prosthetic_Groups_Pigments	Coenzyme_F420_synthesis	78_didemethyl_8_hydroxy_5_deazariboflavin_synthase_subunit_2	3.27115	5.28159	0.00113476	0.0256349
k119_415448	Rubrobacter	Cofactors_Vitamins_Prosthetic_Groups_Pigments	Coenzyme_F420_synthesis	78_didemethyl_8_hydroxy_5_deazariboflavin_synthase_subunit_2	4.87467	4.58741	0.00242615	0.037303
k119_197015	Rubrobacter	Cofactors_Vitamins_Prosthetic_Groups_Pigments	Coenzyme_F420_synthesis	78_didemethyl_8_hydroxy_5_deazariboflavin_synthase_subunit_2	2.2782	4.42287	0.00569291	0.0568168
k119_532986	Rubrobacter	Cofactors_Vitamins_Prosthetic_Groups_Pigments	Coenzyme_F420_synthesis	78_didemethyl_8_hydroxy_5_deazariboflavin_synthase_subunit_2	2.12446	4.04741	0.0137754	0.0899018
k119_116463	Candidatus Nitrososphaera gargensis Ga9.2	Cofactors_Vitamins_Prosthetic_Groups_Pigments	Coenzyme_F420_synthesis	Lactyl_(2)_diphospho_(5')guanosine:78_didemethyl_8_hydroxy_5_deazariboflavin_2_phospho_L_lactate_transferase	4.63748	4.02387	0.0069155	0.0628806
k119_465227	Actinobacteria <phylum>	Cofactors_Vitamins_Prosthetic_Groups_Pigments	Coenzyme_PQQ_synthesis	Coenzyme_PQQ_synthesis_protein_B	2.49002	4.12719	0.0164192	0.0989062
k119_326728	Actinobacteria <phylum>	Cofactors_Vitamins_Prosthetic_Groups_Pigments	Coenzyme_PQQ_synthesis	Coenzyme_PQQ_synthesis_protein_E	3.98004	3.07459	0.0166576	0.0997486
k119_260248	Archaea	Cofactors_Vitamins_Prosthetic_Groups_Pigments	Core_tetrapyrrole_biosynthesis_in_plants	Glutamate_1_semialdehyde_aminotransferase_(EC_5.4.3.8)	2.2217	4.41625	0.0134813	0.0888578
k119_40558	Actinobacteria	Cofactors_Vitamins_Prosthetic_Groups_Pigments	dephospho_tetrahydromethanopterin_biosynthesis_MYousef	GTP_cyclohydrolase_I_(EC_3.5.4.16)_type_1	4.05907	4.95279	0.0151331	0.0945419
k119_406931	Bacteria	Cofactors_Vitamins_Prosthetic_Groups_Pigments	dephospho_tetrahydromethanopterin_biosynthesis_MYousef	GTP_cyclohydrolase_I_(EC_3.5.4.16)_type_1	3.29963	3.2677	0.0126382	0.0857961
k119_465612	Thaumarchaeota	Cofactors_Vitamins_Prosthetic_Groups_Pigments	ergothioneine_biosynthesis	Dimethylhistidine_N_methyltransferase_(EC_2.1.1.44)	2.39549	4.69647	0.00505095	0.0534644
k119_271702	Rubrobacter	Cofactors_Vitamins_Prosthetic_Groups_Pigments	ergothioneine_biosynthesis	ergothioneine_biosynthesis_protein_EgtB	2.59583	4.58544	0.0118938	0.0830452
k119_175768	Actinobacteria <phylum>	Cofactors_Vitamins_Prosthetic_Groups_Pigments	Fe_S_cluster_assembly	Iron_sulfur_cluster_assembly_protein_SufB	13.2269	5.57637	0.000523233	0.01706
k119_178600	Candidatus Nitrososphaera gargensis Ga9.2	Cofactors_Vitamins_Prosthetic_Groups_Pigments	Fe_S_cluster_assembly	Iron_sulfur_cluster_assembly_protein_SufB	5.61606	5.14469	0.00034681	0.0137878
k119_574956	Nitrososphaera	Cofactors_Vitamins_Prosthetic_Groups_Pigments	Fe_S_cluster_assembly	Iron_sulfur_cluster_assembly_protein_SufB	3.73891	5.13271	0.000453954	0.0159812
k119_185042	Nitrososphaeraceae	Cofactors_Vitamins_Prosthetic_Groups_Pigments	Fe_S_cluster_assembly	Iron_sulfur_cluster_assembly_protein_SufB	9.18628	4.98349	0.000189109	0.00981319
k119_13223	Terrabacteria group	Cofactors_Vitamins_Prosthetic_Groups_Pigments	Fe_S_cluster_assembly	Iron_sulfur_cluster_assembly_protein_SufB	3.96364	4.76424	0.00366278	0.0455575
k119_232300	Bacteria	Cofactors_Vitamins_Prosthetic_Groups_Pigments	Fe_S_cluster_assembly	Iron_sulfur_cluster_assembly_protein_SufB	4.1607	4.70796	0.00665606	0.061681
k119_64749	Rubrobacter	Cofactors_Vitamins_Prosthetic_Groups_Pigments	Fe_S_cluster_assembly	Iron_sulfur_cluster_assembly_protein_SufB	2.87605	4.56863	0.00278215	0.0396575
k119_121601	Rubrobacter	Cofactors_Vitamins_Prosthetic_Groups_Pigments	Fe_S_cluster_assembly	Iron_sulfur_cluster_assembly_protein_SufB	3.09466	4.3214	0.00734729	0.0649451
k119_233861	Bacteria	Cofactors_Vitamins_Prosthetic_Groups_Pigments	Fe_S_cluster_assembly	Iron_sulfur_cluster_assembly_protein_SufB	5.29521	4.17663	0.00978578	0.074896
k119_189549	Rubrobacter	Cofactors_Vitamins_Prosthetic_Groups_Pigments	Fe_S_cluster_assembly	Iron_sulfur_cluster_assembly_protein_SufB	2.47518	4.14512	0.0120548	0.0836055
k119_548816	unclassified Actinobacteria	Cofactors_Vitamins_Prosthetic_Groups_Pigments	Fe_S_cluster_assembly	Iron_sulfur_cluster_assembly_protein_SufB	4.22577	3.99349	0.00894006	0.0716038
k119_248028	Rubrobacter	Cofactors_Vitamins_Prosthetic_Groups_Pigments	Fe_S_cluster_assembly	Iron_sulfur_cluster_assembly_protein_SufB	6.18149	3.90594	0.00550037	0.055746
k119_537583	Bacteria	Cofactors_Vitamins_Prosthetic_Groups_Pigments	Fe_S_cluster_assembly	Iron_sulfur_cluster_assembly_protein_SufB	19.8117	3.68735	0.00178621	0.0320295
k119_326118	Rubrobacter	Cofactors_Vitamins_Prosthetic_Groups_Pigments	Fe_S_cluster_assembly	Iron_sulfur_cluster_assembly_protein_SufB	6.66856	3.3604	0.00816209	0.0685505
k119_185888	Nitrososphaeraceae	Cofactors_Vitamins_Prosthetic_Groups_Pigments	Fe_S_cluster_assembly	Iron_sulfur_cluster_assembly_protein_SufB	19.0268	3.22667	0.0154012	0.0954587
k119_238483	Rubrobacter	Cofactors_Vitamins_Prosthetic_Groups_Pigments	Fe_S_cluster_assembly	Iron_sulfur_cluster_assembly_protein_SufB	6.22262	3.16925	0.00727722	0.0646212
k119_9839	Rubrobacter	Cofactors_Vitamins_Prosthetic_Groups_Pigments	Fe_S_cluster_assembly	Iron_sulfur_cluster_assembly_scaffold_protein_IscU	2.71871	4.15382	0.0121019	0.0837946
k119_454510	Rubrobacter	Cofactors_Vitamins_Prosthetic_Groups_Pigments	Fe_S_cluster_assembly	Iron_sulfur_cluster_assembly_scaffold_protein_IscU	5.82837	3.63132	0.0012644	0.0268405
k119_432793	Rubrobacter	Cofactors_Vitamins_Prosthetic_Groups_Pigments	Fe_S_cluster_assembly	Iron_sulfur_cluster_regulator_IscR	3.35806	4.13674	0.00526711	0.0545797
k119_276569	Bacteria	Cofactors_Vitamins_Prosthetic_Groups_Pigments	Fe_S_cluster_assembly	Iron_sulfur_cluster_regulator_IscR	3.89087	3.65644	0.0142127	0.0915013
k119_241953	Actinobacteria	Cofactors_Vitamins_Prosthetic_Groups_Pigments	Fe_S_cluster_assembly	Iron_sulfur_cluster_regulator_SufR	3.04044	4.14449	0.0065989	0.0613821
k119_157917	TACK group	Cofactors_Vitamins_Prosthetic_Groups_Pigments	Fe_S_cluster_assembly	probable_iron_binding_protein_from_the_HesB_IscA_SufA_family	7.81364	3.55104	0.0111687	0.08024
k119_211837	Rubrobacter	Cofactors_Vitamins_Prosthetic_Groups_Pigments	Fe_S_cluster_assembly	Putative_iron_sulfur_cluster_assembly_scaffold_protein_for_SUF_system_SufE2	2.26602	4.3892	0.00973724	0.0747369
k119_7343	Rubrobacter	Cofactors_Vitamins_Prosthetic_Groups_Pigments	Fe_S_cluster_assembly	Putative_iron_sulfur_cluster_assembly_scaffold_protein_for_SUF_system_SufE2	7.40082	3.97322	0.000370689	0.0142414
k119_490535	Rubrobacter	Cofactors_Vitamins_Prosthetic_Groups_Pigments	Fe_S_cluster_assembly	Thiosulfate_sulfurtransferase_rhodanese_(EC_2.8.1.1)	3.99527	4.83014	0.00160004	0.0302467
k119_240984	Rubrobacter	Cofactors_Vitamins_Prosthetic_Groups_Pigments	Fe_S_cluster_assembly	Thiosulfate_sulfurtransferase_rhodanese_(EC_2.8.1.1)	3.47251	4.499	0.0028203	0.0399393
k119_433602	Rubrobacter	Cofactors_Vitamins_Prosthetic_Groups_Pigments	Fe_S_cluster_assembly	Thiosulfate_sulfurtransferase_rhodanese_(EC_2.8.1.1)	2.98355	4.25026	0.00464752	0.0512802
k119_143364	Rubrobacter	Cofactors_Vitamins_Prosthetic_Groups_Pigments	Fe_S_cluster_assembly	Thiosulfate_sulfurtransferase_rhodanese_(EC_2.8.1.1)	3.53582	4.0173	0.00254246	0.0381296
k119_7343	Rubrobacter	Cofactors_Vitamins_Prosthetic_Groups_Pigments	Fe_S_cluster_assembly	Thiosulfate_sulfurtransferase_rhodanese_(EC_2.8.1.1)	7.40082	3.97322	0.000370689	0.0142414
k119_101323	Terrabacteria group	Cofactors_Vitamins_Prosthetic_Groups_Pigments	Fe_S_cluster_assembly	Thiosulfate_sulfurtransferase_rhodanese_(EC_2.8.1.1)	3.26733	3.66525	0.0102003	0.0766073
k119_519177	Rubrobacter	Cofactors_Vitamins_Prosthetic_Groups_Pigments	Folate_Biosynthesis	COG0488:_ATPase_components_of_ABC_transporters_with_duplicated_ATPase_domains	4.24469	5.37371	0.000537995	0.0173525
k119_561500	Bacteria	Cofactors_Vitamins_Prosthetic_Groups_Pigments	Folate_Biosynthesis	COG0488:_ATPase_components_of_ABC_transporters_with_duplicated_ATPase_domains	2.79389	4.94299	0.00151023	0.029498
k119_15821	Bacteria	Cofactors_Vitamins_Prosthetic_Groups_Pigments	Folate_Biosynthesis	COG0488:_ATPase_components_of_ABC_transporters_with_duplicated_ATPase_domains	2.38792	4.84964	0.00774554	0.0667696
k119_205508	Rubrobacter	Cofactors_Vitamins_Prosthetic_Groups_Pigments	Folate_Biosynthesis	COG0488:_ATPase_components_of_ABC_transporters_with_duplicated_ATPase_domains	6.06095	4.75714	0.000232439	0.0110606
k119_577582	Oscillatoria nigro-viridis	Cofactors_Vitamins_Prosthetic_Groups_Pigments	Folate_Biosynthesis	Folylpolyglutamate_synthase_(EC_6.3.2.17)	3.85237	4.97963	0.00234329	0.0367223
k119_511596	Rubrobacter xylanophilus	Cofactors_Vitamins_Prosthetic_Groups_Pigments	Folate_Biosynthesis	Folylpolyglutamate_synthase_(EC_6.3.2.17)	11.5042	4.75634	3.62286e-06	0.000668267
k119_351245	Rubrobacter xylanophilus	Cofactors_Vitamins_Prosthetic_Groups_Pigments	Folate_Biosynthesis	GTP_cyclohydrolase_II_(EC_3.5.4.25)	2.72496	4.56601	0.00375103	0.0460002
k119_424416	Rubrobacter	Cofactors_Vitamins_Prosthetic_Groups_Pigments	Folate_Biosynthesis	GTP_cyclohydrolase_II_(EC_3.5.4.25)	5.22183	4.4805	0.000385288	0.0146052
k119_467646	Rubrobacter	Cofactors_Vitamins_Prosthetic_Groups_Pigments	Folate_Biosynthesis	GTP_cyclohydrolase_II_(EC_3.5.4.25)	4.73135	3.41607	0.00422459	0.0489122
k119_260066	Rubrobacter	Cofactors_Vitamins_Prosthetic_Groups_Pigments	Folate_Biosynthesis	Methionyl_tRNA_formyltransferase_(EC_2.1.2.9)	4.21415	4.38739	0.00478374	0.052045
k119_334015	Rubrobacter xylanophilus	Cofactors_Vitamins_Prosthetic_Groups_Pigments	Folate_Biosynthesis	Methionyl_tRNA_formyltransferase_(EC_2.1.2.9)	3.15708	4.08873	0.00955388	0.0741103
k119_513993	Thaumarchaeota	Cofactors_Vitamins_Prosthetic_Groups_Pigments	Folate_Biosynthesis	Thymidylate_synthase_thyX_(EC_2.1.1._)	3.05345	5.22626	0.00414136	0.0484679
k119_411280	Rubrobacter	Cofactors_Vitamins_Prosthetic_Groups_Pigments	Folate_Biosynthesis	Thymidylate_synthase_thyX_(EC_2.1.1._)	2.58922	4.56564	0.00327375	0.0431308
k119_192507	Rubrobacter xylanophilus	Cofactors_Vitamins_Prosthetic_Groups_Pigments	Folate_Tryp_Chlamydiae	Isochorismate_synthase_(EC_5.4.4.2)	3.72245	4.82497	0.00113944	0.0256935
k119_349253	Rubrobacter	Cofactors_Vitamins_Prosthetic_Groups_Pigments	Heme_biosynthesis_orphans	Heme_biosynthesis_protein_related_to_NirL_and_NirH	5.07982	5.19038	0.00051074	0.0168335
k119_546853	Thaumarchaeota	Cofactors_Vitamins_Prosthetic_Groups_Pigments	Heme_biosynthesis_orphans	Heme_biosynthesis_protein_related_to_NirL_and_NirH	3.07672	5.10455	0.000955747	0.0236339
k119_517619	Thaumarchaeota	Cofactors_Vitamins_Prosthetic_Groups_Pigments	Heme_biosynthesis_orphans	Heme_biosynthesis_protein_related_to_NirL_and_NirH	2.29666	4.43309	0.0124673	0.0851359
k119_128415	Rubrobacter	Cofactors_Vitamins_Prosthetic_Groups_Pigments	Heme_biosynthesis_orphans	Heme_biosynthesis_protein_related_to_NirL_and_NirH	5.81586	3.65002	0.000843151	0.0221864
k119_216505	Rubrobacter	Cofactors_Vitamins_Prosthetic_Groups_Pigments	Menaquinone_and_Phylloquinone_Biosynthesis	Naphthoate_synthase_(EC_4.1.3.36)	2.48029	4.38493	0.00644064	0.0605502
k119_90841	Rubrobacter xylanophilus DSM 9941	Cofactors_Vitamins_Prosthetic_Groups_Pigments	Menaquinone_and_Phylloquinone_Biosynthesis	O_succinylbenzoate_synthase_(EC_4.2.1.113)	3.98754	5.79708	0.000812193	0.0217214
k119_96038	Rubrobacter	Cofactors_Vitamins_Prosthetic_Groups_Pigments	Menaquinone_and_Phylloquinone_Biosynthesis	Ubiquinone/menaquinone_biosynthesis_methyltransferase_UbiE_(EC_2.1.1._)	2.36085	4.89397	0.00311698	0.0420763
k119_529005	Bacteria	Cofactors_Vitamins_Prosthetic_Groups_Pigments	Menaquinone_biosynthesis_from_chorismate_via_14_dihydroxy_2_naphthoate	Ubiquinone_biosynthesis_monooxygenase_UbiB	3.05801	5.20477	0.0128938	0.0867553
k119_161605	Rubrobacter xylanophilus	Cofactors_Vitamins_Prosthetic_Groups_Pigments	Menaquinone_biosynthesis_from_chorismate_via_14_dihydroxy_2_naphthoate	Ubiquinone_biosynthesis_monooxygenase_UbiB	3.31051	5.13589	0.00409824	0.0482683
k119_29513	Thaumarchaeota	Cofactors_Vitamins_Prosthetic_Groups_Pigments	Menaquinone_biosynthesis_from_chorismate_via_14_dihydroxy_2_naphthoate	Ubiquinone_biosynthesis_monooxygenase_UbiB	2.58653	4.43168	0.00619183	0.0593128
k119_291534	Actinobacteria <phylum>	Cofactors_Vitamins_Prosthetic_Groups_Pigments	Methanofuran	Inosine_5'_monophosphate_dehydrogenase_(EC_1.1.1.205)	8.05397	3.18239	0.00582483	0.057476
k119_199875	Rubrobacter xylanophilus	Cofactors_Vitamins_Prosthetic_Groups_Pigments	Molybdenum_cofactor_biosynthesis	CTP:molybdopterin_cytidylyltransferase	3.92692	5.20536	0.000374537	0.0143473
k119_38588	Rubrobacter xylanophilus	Cofactors_Vitamins_Prosthetic_Groups_Pigments	Molybdenum_cofactor_biosynthesis	CTP:molybdopterin_cytidylyltransferase	3.35854	4.74454	0.00466584	0.051398
k119_94229	Rubrobacter xylanophilus	Cofactors_Vitamins_Prosthetic_Groups_Pigments	Molybdenum_cofactor_biosynthesis	CTP:molybdopterin_cytidylyltransferase	5.32092	2.77157	0.0091636	0.072554
k119_131695	Rubrobacter	Cofactors_Vitamins_Prosthetic_Groups_Pigments	Molybdenum_cofactor_biosynthesis	Cyclic_pyranopterin_phosphate_synthase_(MoaA)_(EC_4.1.99.18)	4.11286	5.50142	7.48132e-05	0.00556722
k119_126616	Rubrobacter	Cofactors_Vitamins_Prosthetic_Groups_Pigments	Molybdenum_cofactor_biosynthesis	Cyclic_pyranopterin_phosphate_synthase_(MoaA)_(EC_4.1.99.18)	2.92127	5.3824	0.000689049	0.0199516
k119_91173	Acidobacteria	Cofactors_Vitamins_Prosthetic_Groups_Pigments	Molybdenum_cofactor_biosynthesis	Cyclic_pyranopterin_phosphate_synthase_(MoaA)_(EC_4.1.99.18)	6.08662	5.14182	0.000977905	0.0238723
k119_303795	Rubrobacter	Cofactors_Vitamins_Prosthetic_Groups_Pigments	Molybdenum_cofactor_biosynthesis	Cyclic_pyranopterin_phosphate_synthase_(MoaA)_(EC_4.1.99.18)	3.21377	4.87167	0.000976687	0.0238528
k119_65665	Rubrobacter	Cofactors_Vitamins_Prosthetic_Groups_Pigments	Molybdenum_cofactor_biosynthesis	Cyclic_pyranopterin_phosphate_synthase_(MoaA)_(EC_4.1.99.18)	2.77379	4.55185	0.00429618	0.049303
k119_120970	Rubrobacter	Cofactors_Vitamins_Prosthetic_Groups_Pigments	Molybdenum_cofactor_biosynthesis	Cyclic_pyranopterin_phosphate_synthase_(MoaA)_(EC_4.1.99.18)	3.50781	4.28063	0.00758365	0.0659899
k119_20445	Acidobacteria	Cofactors_Vitamins_Prosthetic_Groups_Pigments	Molybdenum_cofactor_biosynthesis	Cyclic_pyranopterin_phosphate_synthase_(MoaA)_(EC_4.1.99.18)	6.67661	4.21571	0.00804342	0.0680167
k119_470371	Rubrobacter	Cofactors_Vitamins_Prosthetic_Groups_Pigments	Molybdenum_cofactor_biosynthesis	Cyclic_pyranopterin_phosphate_synthase_(MoaA)_(EC_4.1.99.18)	4.84493	3.53191	0.00290891	0.0405129
k119_268918	Rubrobacter	Cofactors_Vitamins_Prosthetic_Groups_Pigments	Molybdenum_cofactor_biosynthesis	Molybdate_binding_domain_of_ModE	4.22276	5.50116	0.000836485	0.0220939
k119_401257	Rubrobacter xylanophilus	Cofactors_Vitamins_Prosthetic_Groups_Pigments	Molybdenum_cofactor_biosynthesis	Molybdate_binding_domain_of_ModE	7.74385	4.11224	0.000720741	0.0204659
k119_165222	Chloroflexi	Cofactors_Vitamins_Prosthetic_Groups_Pigments	Molybdenum_cofactor_biosynthesis	Molybdenum_ABC_transporter_periplasmic_molybdenum_binding_protein_ModA_(TC_3.A.1.8.1)	4.14684	4.04896	0.00988376	0.0752912
k119_328795	Rubrobacter	Cofactors_Vitamins_Prosthetic_Groups_Pigments	Molybdenum_cofactor_biosynthesis	Molybdenum_cofactor_biosynthesis_protein_MoaB	6.18709	4.52041	0.00193212	0.033397
k119_588249	Rubrobacter	Cofactors_Vitamins_Prosthetic_Groups_Pigments	Molybdenum_cofactor_biosynthesis	Molybdenum_cofactor_biosynthesis_protein_MoaC	3.00196	5.43404	0.000391716	0.0147435
k119_298257	Rubrobacter	Cofactors_Vitamins_Prosthetic_Groups_Pigments	Molybdenum_cofactor_biosynthesis	Molybdenum_cofactor_biosynthesis_protein_MoaC	4.46413	4.09339	0.00185202	0.0325827
k119_456957	Rubrobacter	Cofactors_Vitamins_Prosthetic_Groups_Pigments	Molybdenum_cofactor_biosynthesis	Molybdopterin_biosynthesis_protein_MoeA	3.03459	4.53267	0.00723351	0.0644069
k119_400275	Thermomicrobia	Cofactors_Vitamins_Prosthetic_Groups_Pigments	Molybdenum_cofactor_biosynthesis	Molybdopterin_guanine_dinucleotide_biosynthesis_protein_MobA	3.12069	4.19029	0.0154937	0.0957747
k119_484001	Candidatus Nitrososphaera gargensis Ga9.2	Cofactors_Vitamins_Prosthetic_Groups_Pigments	NAD_and_NADP_cofactor_biosynthesis_global	ADP_ribose_pyrophosphatase_(EC_3.6.1.13)	2.62866	4.66962	0.00493523	0.0527916
k119_455649	Rubrobacter	Cofactors_Vitamins_Prosthetic_Groups_Pigments	NAD_and_NADP_cofactor_biosynthesis_global	ADP_ribose_pyrophosphatase_(EC_3.6.1.13)	6.54664	4.56917	0.009181	0.0726128
k119_553040	Rubrobacter	Cofactors_Vitamins_Prosthetic_Groups_Pigments	NAD_and_NADP_cofactor_biosynthesis_global	C_terminal_domain_of_CinA_type_S	32.096	3.07102	0.00202061	0.034167
k119_501557	Rubrobacter	Cofactors_Vitamins_Prosthetic_Groups_Pigments	NAD_and_NADP_cofactor_biosynthesis_global	DNA_ligase_(EC_6.5.1.2)	2.95095	4.47054	0.00642958	0.0605024
k119_240492	Pseudonocardiaceae	Cofactors_Vitamins_Prosthetic_Groups_Pigments	NAD_and_NADP_cofactor_biosynthesis_global	Glutamine_amidotransferase_chain_of_NAD_synthetase	8.70164	5.16427	0.0001499	0.00858657
k119_561172	Actinobacteria <phylum>	Cofactors_Vitamins_Prosthetic_Groups_Pigments	NAD_and_NADP_cofactor_biosynthesis_global	Glutamine_amidotransferase_chain_of_NAD_synthetase	3.10813	4.96097	0.00461296	0.0510924
k119_560771	Rubrobacter	Cofactors_Vitamins_Prosthetic_Groups_Pigments	NAD_and_NADP_cofactor_biosynthesis_global	NAD_synthetase_(EC_6.3.1.5)	4.00646	5.15945	0.000557149	0.0176392
k119_278080	Rubrobacter	Cofactors_Vitamins_Prosthetic_Groups_Pigments	NAD_and_NADP_cofactor_biosynthesis_global	NAD_synthetase_(EC_6.3.1.5)	3.25952	4.35175	0.0065599	0.0611896
k119_50032	Rubrobacter	Cofactors_Vitamins_Prosthetic_Groups_Pigments	NAD_and_NADP_cofactor_biosynthesis_global	Nicotinamidase_(EC_3.5.1.19)	3.3182	5.23492	0.00059104	0.018329
k119_562888	Rubrobacter xylanophilus	Cofactors_Vitamins_Prosthetic_Groups_Pigments	NAD_and_NADP_cofactor_biosynthesis_global	Nicotinamidase_(EC_3.5.1.19)	4.63545	3.28628	0.011755	0.082506
k119_556532	Thaumarchaeota	Cofactors_Vitamins_Prosthetic_Groups_Pigments	NAD_and_NADP_cofactor_biosynthesis_global	Nicotinamide_nucleotide_adenylyltransferase_NadM_family_(EC_2.7.7.1)	2.94116	5.00805	0.00585677	0.0576514
k119_523432	Rubrobacter	Cofactors_Vitamins_Prosthetic_Groups_Pigments	NAD_and_NADP_cofactor_biosynthesis_global	Nicotinate_nucleotide_adenylyltransferase_(EC_2.7.7.18)	3.51332	4.79046	0.00885704	0.0713254
k119_392791	Rubrobacter xylanophilus	Cofactors_Vitamins_Prosthetic_Groups_Pigments	NAD_and_NADP_cofactor_biosynthesis_global	Nicotinate_nucleotide_adenylyltransferase_(EC_2.7.7.18)	2.96378	4.61483	0.00279969	0.0398111
k119_370859	Rubrobacter	Cofactors_Vitamins_Prosthetic_Groups_Pigments	NAD_and_NADP_cofactor_biosynthesis_global	Nicotinate_nucleotide_adenylyltransferase_(EC_2.7.7.18)	14.538	4.58823	0.000113747	0.00719623
k119_417383	Rubrobacter	Cofactors_Vitamins_Prosthetic_Groups_Pigments	NAD_and_NADP_cofactor_biosynthesis_global	Nicotinate_phosphoribosyltransferase_(EC_2.4.2.11)	3.43172	4.92409	0.00258503	0.0384188
k119_537898	Rubrobacter aplysinae	Cofactors_Vitamins_Prosthetic_Groups_Pigments	NADH_dependent_reduced_ferredoxin:NADDP+_oxidoreductase	Redox_sensitive_transcriptional_regulator_(AT_rich_DNA_binding_protein)	3.89364	5.22555	0.000612829	0.0186891
k119_297729	Actinobacteria	Cofactors_Vitamins_Prosthetic_Groups_Pigments	NADH_dependent_reduced_ferredoxin:NADDP+_oxidoreductase	Redox_sensitive_transcriptional_regulator_(AT_rich_DNA_binding_protein)	2.70298	5.09251	0.00135984	0.0279045
k119_4078	Rubrobacter	Cofactors_Vitamins_Prosthetic_Groups_Pigments	NADH_dependent_reduced_ferredoxin:NADDP+_oxidoreductase	Redox_sensitive_transcriptional_regulator_(AT_rich_DNA_binding_protein)	3.02148	4.69191	0.00225366	0.0360477
k119_31526	Rubrobacter	Cofactors_Vitamins_Prosthetic_Groups_Pigments	NADH_dependent_reduced_ferredoxin:NADDP+_oxidoreductase	Redox_sensitive_transcriptional_regulator_(AT_rich_DNA_binding_protein)	3.94741	4.14476	0.00715575	0.0640386
k119_516373	Rubrobacter	Cofactors_Vitamins_Prosthetic_Groups_Pigments	NADH_dependent_reduced_ferredoxin:NADDP+_oxidoreductase	Redox_sensitive_transcriptional_regulator_(AT_rich_DNA_binding_protein)	7.27817	4.03631	0.00289949	0.0405019
k119_136083	Rubrobacter	Cofactors_Vitamins_Prosthetic_Groups_Pigments	NADH_dependent_reduced_ferredoxin:NADDP+_oxidoreductase	Redox_sensitive_transcriptional_regulator_(AT_rich_DNA_binding_protein)	12.052	3.90681	0.00120718	0.0263201
k119_553884	Rubrobacter	Cofactors_Vitamins_Prosthetic_Groups_Pigments	NADH_dependent_reduced_ferredoxin:NADDP+_oxidoreductase	Redox_sensitive_transcriptional_regulator_(AT_rich_DNA_binding_protein)	6.48716	3.62204	0.00559612	0.0562535
k119_194683	Rubrobacter	Cofactors_Vitamins_Prosthetic_Groups_Pigments	NADH_dependent_reduced_ferredoxin:NADDP+_oxidoreductase	Redox_sensitive_transcriptional_regulator_(AT_rich_DNA_binding_protein)	9.10591	3.32277	0.00269317	0.0390904
k119_436478	Rubrobacter	Cofactors_Vitamins_Prosthetic_Groups_Pigments	NADH_dependent_reduced_ferredoxin:NADDP+_oxidoreductase	Redox_sensitive_transcriptional_regulator_(AT_rich_DNA_binding_protein)	15.7501	2.93599	0.00136473	0.0279736
k119_272511	Actinobacteria	Cofactors_Vitamins_Prosthetic_Groups_Pigments	Pterin_biosynthesis	Pterin_4_alpha_carbinolamine_dehydratase_(EC_4.2.1.96)	3.29919	5.02041	0.00169464	0.0311656
k119_313099	cellular organisms	Cofactors_Vitamins_Prosthetic_Groups_Pigments	Pterin_biosynthesis	Pterin_4_alpha_carbinolamine_dehydratase_(EC_4.2.1.96)	4.38265	4.07275	0.0149675	0.0939845
k119_354063	Bacteria	Cofactors_Vitamins_Prosthetic_Groups_Pigments	Pterin_carbinolamine_dehydratase	Fumarylacetoacetate_hydrolase_family_protein	2.74085	4.66922	0.0146677	0.0929074
k119_99091	Terrabacteria group	Cofactors_Vitamins_Prosthetic_Groups_Pigments	Pterin_carbinolamine_dehydratase	Fumarylacetoacetate_hydrolase_family_protein	6.08857	3.20048	0.00123044	0.0265652
k119_4831	Bacteria	Cofactors_Vitamins_Prosthetic_Groups_Pigments	Pyridoxin_(Vitamin_B6)_Biosynthesis	Pyridoxine_biosynthesis_glutamine_amidotransferase_synthase_subunit_(EC_2.4.2._)	10.104	3.89055	0.000153124	0.00866384
k119_307703	Rubrobacter	Cofactors_Vitamins_Prosthetic_Groups_Pigments	Queuosine_HMP	tRNA_guanine_transglycosylase_(EC_2.4.2.29)	5.4513	4.44214	0.00087547	0.022683
k119_166103	Gemmatimonadetes	Cofactors_Vitamins_Prosthetic_Groups_Pigments	Quinones_biosynthesis_HGM	3_polyprenyl_4_hydroxybenzoate_carboxy_lyase_(EC_4.1.1._)	2.63493	4.44405	0.00407013	0.0480726
k119_475057	Thaumarchaeota	Cofactors_Vitamins_Prosthetic_Groups_Pigments	Quinones_biosynthesis_HGM	3_polyprenyl_4_hydroxybenzoate_carboxy_lyase_(EC_4.1.1._)	6.08542	4.06558	0.00507927	0.0535856
k119_121211	Nitrososphaera	Cofactors_Vitamins_Prosthetic_Groups_Pigments	Quinones_biosynthesis_HGM	3_polyprenyl_4_hydroxybenzoate_carboxy_lyase_(EC_4.1.1._)	6.07281	3.82939	0.00573234	0.0569949
k119_468034	Rubrobacter xylanophilus	Cofactors_Vitamins_Prosthetic_Groups_Pigments	Riboflavin_FMN_and_FAD_metabolism_Extended	tRNA_(5_methylaminomethyl_2_thiouridylate)_methyltransferase_(EC_2.1.1.61)	2.95455	4.82076	0.00326996	0.0431308
k119_353536	Nitrososphaera	Cofactors_Vitamins_Prosthetic_Groups_Pigments	Riboflavin_FMN_and_FAD_metabolism_Extended	tRNA_(5_methylaminomethyl_2_thiouridylate)_methyltransferase_(EC_2.1.1.61)	2.27543	4.78751	0.00917617	0.0726067
k119_118779	Nitrososphaera	Cofactors_Vitamins_Prosthetic_Groups_Pigments	Riboflavin_FMN_and_FAD_metabolism_Extended	tRNA_(5_methylaminomethyl_2_thiouridylate)_methyltransferase_(EC_2.1.1.61)	2.75702	4.76083	0.00282503	0.0399632
k119_247934	Rubrobacter xylanophilus DSM 9941	Cofactors_Vitamins_Prosthetic_Groups_Pigments	Riboflavin_FMN_and_FAD_metabolism_Extended	tRNA_pseudouridine_synthase_B_(EC_4.2.1.70)	4.1274	4.31568	0.00872819	0.0709273
k119_507757	Nitrososphaera	Cofactors_Vitamins_Prosthetic_Groups_Pigments	Riboflavin_HMP	34_dihydroxy_2_butanone_4_phosphate_synthase_(EC_4.1.99.12)	3.20072	4.34847	0.014518	0.0924343
k119_400267	Rubrobacter xylanophilus	Cofactors_Vitamins_Prosthetic_Groups_Pigments	Riboflavin_HMP	67_dimethyl_8_ribityllumazine_synthase_(EC_2.5.1.78)	4.98364	4.02726	0.0125454	0.0854398
k119_424416	Rubrobacter	Cofactors_Vitamins_Prosthetic_Groups_Pigments	Riboflavin_HMP	Riboflavin_synthase_eubacterial/eukaryotic_(EC_2.5.1.9)	5.22183	4.4805	0.000385288	0.0146052
k119_434873	Rubrobacter	Cofactors_Vitamins_Prosthetic_Groups_Pigments	Test___Riboflavin	tRNA_specific_adenosine_34_deaminase_(EC_3.5.4._)	7.25124	5.93634	0.000229248	0.0110144
k119_254374	Rubrobacter	Cofactors_Vitamins_Prosthetic_Groups_Pigments	Test___Riboflavin	tRNA_specific_adenosine_34_deaminase_(EC_3.5.4._)	3.08671	5.38389	0.00384757	0.0466621
k119_540157	Anaerolineae	Cofactors_Vitamins_Prosthetic_Groups_Pigments	Test___Riboflavin	tRNA_specific_adenosine_34_deaminase_(EC_3.5.4._)	2.62446	4.46737	0.0144993	0.0923792
k119_427102	Rubrobacter	Cofactors_Vitamins_Prosthetic_Groups_Pigments	YgfZ	Dihydroorotase_(EC_3.5.2.3)	3.37299	4.64724	0.01249	0.0852118
k119_5739	Terrabacteria group	Cofactors_Vitamins_Prosthetic_Groups_Pigments	YgfZ	Dihydroorotate_dehydrogenase_catalytic_subunit_(EC_1.3.3.1)	2.15233	4.33818	0.00757801	0.0659817
k119_82213	Nocardioidaceae	Cofactors_Vitamins_Prosthetic_Groups_Pigments	YgfZ	DUF1794	2.98986	4.74716	0.011101	0.0799293
k119_440889	Rubrobacter	Cofactors_Vitamins_Prosthetic_Groups_Pigments	YgfZ	Ferredoxin	8.8885	6.11377	2.07663e-05	0.00238075
k119_461275	Rubrobacter	Cofactors_Vitamins_Prosthetic_Groups_Pigments	YgfZ	Ferredoxin	4.52553	5.93119	0.00026919	0.0120045
k119_194453	Rubrobacter	Cofactors_Vitamins_Prosthetic_Groups_Pigments	YgfZ	Ferredoxin	2.92935	5.00298	0.00450693	0.0505149
k119_454564	Rubrobacter xylanophilus	Cofactors_Vitamins_Prosthetic_Groups_Pigments	YgfZ	Ferredoxin	3.47329	4.68878	0.00762702	0.066188
k119_506651	Rubrobacter	Cofactors_Vitamins_Prosthetic_Groups_Pigments	YgfZ	Ferredoxin	2.39703	4.58451	0.00928359	0.0730488
k119_75818	Rubrobacter xylanophilus	Cofactors_Vitamins_Prosthetic_Groups_Pigments	YgfZ	Ferredoxin	3.83916	4.55214	0.00357975	0.0450872
k119_308247	Bacteria	Cofactors_Vitamins_Prosthetic_Groups_Pigments	YgfZ	Ferredoxin	3.26315	3.96158	0.0132662	0.0880526
k119_285861	Rubrobacter	Cofactors_Vitamins_Prosthetic_Groups_Pigments	YgfZ	Ferredoxin	8.27128	3.736	0.00267417	0.0389984
k119_64351	Rubrobacter	Cofactors_Vitamins_Prosthetic_Groups_Pigments	YgfZ	Ferredoxin	8.39145	3.13562	0.000933681	0.0233327
k119_76609	Rubrobacter	Cofactors_Vitamins_Prosthetic_Groups_Pigments	YgfZ	Ferric_uptake_regulation_protein_FUR	4.36354	4.96955	0.000848348	0.0222737
k119_209633	Rubrobacter	Cofactors_Vitamins_Prosthetic_Groups_Pigments	YgfZ	Folate_dependent_protein_for_Fe/S_cluster_synthesis/repair_in_oxidative_stress	5.08195	5.0616	0.00162779	0.0305424
k119_62613	Bacteria	Cofactors_Vitamins_Prosthetic_Groups_Pigments	YgfZ	Glutathione_dependent_formaldehyde_activating_enzyme_(EC_4.4.1.22)	2.18737	4.78365	0.00758331	0.0659899
k119_9314	Rubrobacter xylanophilus	Cofactors_Vitamins_Prosthetic_Groups_Pigments	YgfZ	Orotate_phosphoribosyltransferase_(EC_2.4.2.10)	4.30523	5.13493	0.000573532	0.0179889
k119_105620	Rubrobacter	Cofactors_Vitamins_Prosthetic_Groups_Pigments	YgfZ	Orotate_phosphoribosyltransferase_(EC_2.4.2.10)	9.74626	4.37424	0.000628083	0.018959
k119_127340	Thaumarchaeota	Cofactors_Vitamins_Prosthetic_Groups_Pigments	YgfZ	Phosphoribosylformylglycinamidine_cyclo_ligase_(EC_6.3.3.1)	2.90558	4.55032	0.00717872	0.0641432
k119_411280	Rubrobacter	Cofactors_Vitamins_Prosthetic_Groups_Pigments	YgfZ	Rhodanese_related_sulfurtransferase	2.58922	4.56564	0.00327375	0.0431308
k119_345731	Terrabacteria group	Cofactors_Vitamins_Prosthetic_Groups_Pigments	YgfZ	Rhodanese_related_sulfurtransferase	2.40141	4.26105	0.0089588	0.0716342
k119_536946	Rubrobacter xylanophilus	Cofactors_Vitamins_Prosthetic_Groups_Pigments	YgfZ	Rhodanese_related_sulfurtransferase	4.89304	3.04784	0.0124002	0.0848305
k119_202218	Terrabacteria group	Cofactors_Vitamins_Prosthetic_Groups_Pigments	YgfZ	S_(hydroxymethyl)glutathione_dehydrogenase_(EC_1.1.1.284)	2.14977	4.7619	0.00241007	0.0371969
k119_571856	Bacteria	Cofactors_Vitamins_Prosthetic_Groups_Pigments	YgfZ	S_(hydroxymethyl)glutathione_dehydrogenase_(EC_1.1.1.284)	3.34936	4.67619	0.00865704	0.0706295
k119_214187	Cyanobacteria	Cofactors_Vitamins_Prosthetic_Groups_Pigments	YgfZ	S_(hydroxymethyl)glutathione_dehydrogenase_(EC_1.1.1.284)	6.42289	4.49503	0.000799564	0.0215847
k119_302888	Bacteria	Cofactors_Vitamins_Prosthetic_Groups_Pigments	YgfZ	S_(hydroxymethyl)glutathione_dehydrogenase_(EC_1.1.1.284)	2.98606	4.24574	0.00912082	0.072362
k119_417468	Rubrobacter xylanophilus	Cofactors_Vitamins_Prosthetic_Groups_Pigments	YgfZ	S_formylglutathione_hydrolase_(EC_3.1.2.12)	4.01987	3.31525	0.0147741	0.093309
k119_588873	Mycobacterium	Cofactors_Vitamins_Prosthetic_Groups_Pigments	YgfZ	Spore_photoproduct_lyase_(EC_4.1.99.14)	2.95406	4.26361	0.0139642	0.090633
k119_488314	Archaea	Cofactors_Vitamins_Prosthetic_Groups_Pigments	YgfZ	tRNA_i(6)A37_methylthiotransferase	3.79942	5.54007	0.000496923	0.0166378
k119_54756	Rubrobacter	Cofactors_Vitamins_Prosthetic_Groups_Pigments	YgfZ	tRNA_i(6)A37_methylthiotransferase	3.1175	4.67704	0.0101954	0.0766073
k119_327103	Rubrobacter	Cofactors_Vitamins_Prosthetic_Groups_Pigments	YgfZ	tRNA_i(6)A37_methylthiotransferase	5.31993	4.17996	0.00475741	0.0519031
k119_499365	Rubrobacter radiotolerans	Cofactors_Vitamins_Prosthetic_Groups_Pigments	YgfZ	Twin_arginine_translocation_protein_TatA	2.34976	4.55601	0.0082249	0.0687679
k119_468411	Bacteria	Cofactors_Vitamins_Prosthetic_Groups_Pigments	YgfZ	Twin_arginine_translocation_protein_TatA	9.28959	4.30472	0.00888383	0.0713609
k119_316855	Solirubrobacterales	Cofactors_Vitamins_Prosthetic_Groups_Pigments	YgfZ	Twin_arginine_translocation_protein_TatA	2.27914	4.29681	0.0155561	0.0960294
k119_222558	Actinobacteria <phylum>	Cofactors_Vitamins_Prosthetic_Groups_Pigments	YgfZ	Twin_arginine_translocation_protein_TatA	2.46399	4.18812	0.0154105	0.095492
k119_203469	Actinobacteria <phylum>	Cofactors_Vitamins_Prosthetic_Groups_Pigments	YgfZ	Twin_arginine_translocation_protein_TatA	3.90909	3.65368	0.00411326	0.0483374
k119_446301	Nitrososphaera	DNA_Metabolism	DNA_Helicase_of_Unknown_Function	DNA_helicase_(Rad25_homolog)	2.73226	4.73607	0.0165114	0.099219
k119_446301	Nitrososphaera	DNA_Metabolism	DNA_Helicase_of_Unknown_Function	Hypothetical_protein_(associated_with_DNA_helicase___Rad25_homolog)	2.73226	4.73607	0.0165114	0.099219
k119_576510	Rubrobacter radiotolerans	DNA_Metabolism	DNA_processing_cluster	DNA_topoisomerase_III_(EC_5.99.1.2)	4.20789	5.02067	0.00198611	0.0338033
k119_99735	Rubrobacter	DNA_Metabolism	DNA_processing_cluster	Recombination_protein_RecR	2.75584	4.08425	0.00978315	0.074896
k119_186002	Rubrobacter	DNA_Metabolism	DNA_processing_cluster	Recombination_protein_RecR	3.68094	3.39702	0.0105005	0.0776775
k119_530827	Rubrobacter	DNA_Metabolism	DNA_processing_cluster	Recombination_protein_RecR	6.73622	2.76978	0.0118608	0.0829336
k119_536773	Thaumarchaeota	DNA_Metabolism	DNA_recombination_archaeal	DNA_repair_and_recombination_protein_RadA	4.37342	3.58396	0.0128729	0.0866747
k119_125924	Terrabacteria group	DNA_Metabolism	DNA_repair_bacterial	DNA_repair_protein_RadA	4.0677	5.74424	0.000626207	0.0189256
k119_259315	Rubrobacter	DNA_Metabolism	DNA_repair_bacterial	DNA_repair_protein_RadA	2.74628	4.62135	0.00716481	0.0640809
k119_44508	Rubrobacter	DNA_Metabolism	DNA_repair_bacterial	DNA_repair_protein_RadA	2.62027	4.19777	0.0162187	0.0982236
k119_233090	Rubrobacter	DNA_Metabolism	DNA_repair_bacterial	DNA_repair_protein_RadA	5.83587	3.92044	0.000441632	0.0157424
k119_527709	Rubrobacter	DNA_Metabolism	DNA_repair_bacterial	DNA_repair_protein_RadC	3.71677	5.0658	0.000929085	0.0232975
k119_441371	Rubrobacter	DNA_Metabolism	DNA_repair_bacterial	DNA_repair_protein_RadC	2.23091	4.52816	0.00609467	0.0588782
k119_392328	Rubrobacter	DNA_Metabolism	DNA_repair_bacterial	DNA_repair_protein_RadC	5.44707	4.28066	0.000826836	0.021894
k119_45848	Rubrobacter	DNA_Metabolism	DNA_repair_bacterial	DNA_repair_protein_RadC	4.26208	4.03565	0.00417811	0.0486891
k119_92117	Rubrobacter	DNA_Metabolism	DNA_repair_bacterial	DNA_repair_protein_RadC	9.84281	3.42051	0.00121972	0.0264663
k119_51620	Rubrobacter	DNA_Metabolism	DNA_repair_bacterial	Endonuclease_IV_(EC_3.1.21.2)	2.59138	4.92617	0.00124828	0.0267286
k119_249910	Rubrobacter	DNA_Metabolism	DNA_repair_bacterial	Endonuclease_IV_(EC_3.1.21.2)	2.83805	4.48475	0.00838838	0.0693237
k119_423609	Rubrobacter	DNA_Metabolism	DNA_repair_bacterial	Endonuclease_V_(EC_3.1.21.7)	5.51706	5.52009	0.000555274	0.017628
k119_495051	Rubrobacter aplysinae	DNA_Metabolism	DNA_repair_bacterial	G:T/U_mismatch_specific_uracil/thymine_DNA_glycosylase	3.20199	4.89918	0.0103256	0.0769958
k119_345021	Rubrobacter aplysinae	DNA_Metabolism	DNA_repair_bacterial	G:T/U_mismatch_specific_uracil/thymine_DNA_glycosylase	2.36757	4.26931	0.0103877	0.0772685
k119_309395	Rubrobacter	DNA_Metabolism	DNA_repair_bacterial	RecA_protein	3.90347	5.35353	0.000673559	0.0196309
k119_165026	Rubrobacter	DNA_Metabolism	DNA_repair_bacterial	RecA_protein	8.0134	3.42157	0.00388365	0.0467696
k119_393413	Bacteria	DNA_Metabolism	DNA_repair_bacterial	RecA_protein	7.31408	3.37953	0.0014535	0.028978
k119_229532	Rubrobacter	DNA_Metabolism	DNA_repair_bacterial	Single_stranded_DNA_binding_protein	4.43821	4.49033	0.00678477	0.0623191
k119_287187	Rubrobacter	DNA_Metabolism	DNA_repair_bacterial	Single_stranded_DNA_binding_protein	3.3693	4.24265	0.00676825	0.0622615
k119_229556	Micrococcaceae	DNA_Metabolism	DNA_repair_bacterial	Single_stranded_DNA_binding_protein	4.51481	3.9402	0.0148932	0.0936852
k119_153266	Terrabacteria group	DNA_Metabolism	DNA_repair_bacterial	SOS_response_repressor_and_protease_LexA_(EC_3.4.21.88)	2.24281	4.69962	0.00627107	0.0597237
k119_394177	Actinobacteria <phylum>	DNA_Metabolism	DNA_repair_bacterial	SOS_response_repressor_and_protease_LexA_(EC_3.4.21.88)	11.1315	3.70159	0.00124492	0.0266812
k119_205453	Alphaproteobacteria	DNA_Metabolism	DNA_repair_bacterial	SOS_response_repressor_and_protease_LexA_(EC_3.4.21.88)	11.6808	3.09281	0.00463542	0.0512223
k119_252092	Rubrobacter	DNA_Metabolism	DNA_repair_bacterial_MutL_MutS_system	DNA_mismatch_repair_protein_MutL	3.90963	5.151	0.00635564	0.0601259
k119_291056	Rubrobacter	DNA_Metabolism	DNA_repair_bacterial_MutL_MutS_system	DNA_mismatch_repair_protein_MutL	3.95472	4.35833	0.00502806	0.0533137
k119_57475	Bacteria	DNA_Metabolism	DNA_repair_bacterial_photolyase	Deoxyribodipyrimidine_photolyase_type_II_(EC_4.1.99.3)	4.82551	5.69667	0.000882809	0.0227129
k119_547608	Rubrobacter	DNA_Metabolism	DNA_repair_bacterial_photolyase	Deoxyribodipyrimidine_photolyase_type_II_(EC_4.1.99.3)	8.23667	5.16968	8.44699e-05	0.00600175
k119_551852	Terrabacteria group	DNA_Metabolism	DNA_repair_bacterial_photolyase	Deoxyribodipyrimidine_photolyase_type_II_(EC_4.1.99.3)	2.75038	4.26416	0.0118206	0.0827623
k119_174373	Rubrobacter	DNA_Metabolism	DNA_repair_bacterial_photolyase	Deoxyribodipyrimidine_photolyase_type_II_(EC_4.1.99.3)	6.4904	4.22078	0.0021012	0.0348407
k119_518542	Rubrobacter	DNA_Metabolism	DNA_repair_bacterial_RecFOR_pathway	ATP_dependent_DNA_helicase_RecQ	4.67282	4.68776	0.00376496	0.0460456
k119_277242	Rubrobacter	DNA_Metabolism	DNA_repair_bacterial_RecFOR_pathway	DNA_recombination_and_repair_protein_RecF	4.61626	4.44006	0.00187316	0.0328047
k119_101088	cellular organisms	DNA_Metabolism	DNA_repair_bacterial_RecFOR_pathway	DNA_recombination_and_repair_protein_RecF	2.91236	4.41583	0.00851463	0.0699089
k119_374961	Rubrobacter	DNA_Metabolism	DNA_repair_bacterial_RecFOR_pathway	DNA_recombination_and_repair_protein_RecF	6.7723	3.28315	0.00266284	0.038894
k119_169238	Rubrobacter	DNA_Metabolism	DNA_repair_bacterial_RecFOR_pathway	DNA_recombination_and_repair_protein_RecO	2.6739	4.47073	0.00676871	0.0622615
k119_448558	Rubrobacter	DNA_Metabolism	DNA_repair_bacterial_UvrD_and_related_helicases	ATP_dependent_DNA_helicase_UvrD/PcrA	4.89182	6.10503	3.43431e-05	0.00332166
k119_537508	Rubrobacter	DNA_Metabolism	DNA_repair_bacterial_UvrD_and_related_helicases	ATP_dependent_DNA_helicase_UvrD/PcrA	2.71211	4.84323	0.00670146	0.0619229
k119_359297	Rubrobacter	DNA_Metabolism	DNA_repair_bacterial_UvrD_and_related_helicases	ATP_dependent_DNA_helicase_UvrD/PcrA	3.53247	4.61203	0.00982722	0.0750873
k119_245272	Rubrobacter	DNA_Metabolism	DNA_repair_bacterial_UvrD_and_related_helicases	ATP_dependent_DNA_helicase_UvrD/PcrA	3.45737	4.52718	0.00412389	0.0483883
k119_62680	Rubrobacter	DNA_Metabolism	DNA_repair_bacterial_UvrD_and_related_helicases	ATP_dependent_DNA_helicase_UvrD/PcrA	6.87722	4.46198	0.000998793	0.0241113
k119_47449	Nocardioidaceae	DNA_Metabolism	DNA_repair_bacterial_UvrD_and_related_helicases	ATP_dependent_DNA_helicase_UvrD/PcrA	3.08896	4.37146	0.00807086	0.0681356
k119_63804	Rubrobacter	DNA_Metabolism	DNA_repair_bacterial_UvrD_and_related_helicases	ATP_dependent_DNA_helicase_UvrD/PcrA	5.24345	4.32346	0.000432805	0.0155614
k119_99133	Rubrobacter	DNA_Metabolism	DNA_Repair_Base_Excision	DNA_polymerase_I_(EC_2.7.7.7)	5.89597	5.68118	9.19316e-05	0.00631619
k119_146606	Rubrobacter	DNA_Metabolism	DNA_Repair_Base_Excision	DNA_polymerase_I_(EC_2.7.7.7)	2.83883	5.05239	0.00186114	0.032659
k119_488257	Rubrobacter	DNA_Metabolism	DNA_Repair_Base_Excision	DNA_polymerase_I_(EC_2.7.7.7)	5.01074	4.79346	0.000887056	0.0227677
k119_394163	Rubrobacter	DNA_Metabolism	DNA_Repair_Base_Excision	DNA_polymerase_I_(EC_2.7.7.7)	2.65248	4.69959	0.0122453	0.084242
k119_309560	Rubrobacter	DNA_Metabolism	DNA_Repair_Base_Excision	DNA_polymerase_I_(EC_2.7.7.7)	3.46867	4.19811	0.0106425	0.0781102
k119_296700	Rubrobacter	DNA_Metabolism	DNA_Repair_Base_Excision	DNA_polymerase_I_(EC_2.7.7.7)	2.83303	4.17673	0.0145519	0.0925388
k119_433489	Rubrobacter	DNA_Metabolism	DNA_Repair_Base_Excision	DNA_polymerase_I_(EC_2.7.7.7)	3.50988	4.17086	0.00713698	0.0639478
k119_297844	Actinobacteria	DNA_Metabolism	DNA_Repair_Base_Excision	DNA_polymerase_I_(EC_2.7.7.7)	3.08771	4.01603	0.00940156	0.0734605
k119_410402	Rubrobacter radiotolerans	DNA_Metabolism	DNA_Repair_Base_Excision	Formamidopyrimidine_DNA_glycosylase_(EC_3.2.2.23)	4.19368	5.69911	0.000415878	0.0152359
k119_430998	Rubrobacter aplysinae	DNA_Metabolism	DNA_Repair_Base_Excision	Formamidopyrimidine_DNA_glycosylase_(EC_3.2.2.23)	4.45613	4.55293	0.0016487	0.03075
k119_583509	Rubrobacter	DNA_Metabolism	DNA_Repair_Base_Excision	Formamidopyrimidine_DNA_glycosylase_(EC_3.2.2.23)	3.3797	3.80757	0.00654193	0.0611292
k119_386055	Candidatus Nitrocosmicus oleophilus	DNA_Metabolism	DNA_Repair_Base_Excision	Ku_domain_protein	5.40355	3.95242	0.00373283	0.0458805
k119_515952	Rubrobacter	DNA_Metabolism	DNA_Repair_Base_Excision	Single_stranded_DNA_specific_exonuclease_RecJ_(EC_3.1._._)	4.44897	4.6379	0.00191011	0.0331186
k119_69635	Rubrobacter	DNA_Metabolism	DNA_repair_UvrABC_system	Excinuclease_ABC_subunit_A	4.25723	5.35931	0.00165248	0.0307789
k119_65175	Archaea	DNA_Metabolism	DNA_repair_UvrABC_system	Excinuclease_ABC_subunit_A	3.05165	5.16116	0.00368862	0.0456548
k119_558517	Rubrobacter	DNA_Metabolism	DNA_repair_UvrABC_system	Excinuclease_ABC_subunit_A	3.04036	4.95357	0.00149529	0.0293834
k119_37786	Terrabacteria group	DNA_Metabolism	DNA_repair_UvrABC_system	Excinuclease_ABC_subunit_A	5.90966	4.92443	0.00102301	0.024346
k119_193329	Archaea	DNA_Metabolism	DNA_repair_UvrABC_system	Excinuclease_ABC_subunit_A	2.40925	4.89344	0.00688965	0.0627439
k119_138627	Rubrobacter	DNA_Metabolism	DNA_repair_UvrABC_system	Excinuclease_ABC_subunit_A	4.69604	4.45803	0.00337334	0.0437853
k119_188649	Streptomyces	DNA_Metabolism	DNA_repair_UvrABC_system	Excinuclease_ABC_subunit_A	2.27184	4.20248	0.0126665	0.0859012
k119_487699	Rubrobacter	DNA_Metabolism	DNA_repair_UvrABC_system	Excinuclease_ABC_subunit_A	6.58508	3.84238	0.00151251	0.0295052
k119_131960	Rubrobacter	DNA_Metabolism	DNA_repair_UvrABC_system	Excinuclease_ABC_subunit_A	3.01058	3.53753	0.0126714	0.0859264
k119_292190	Bacteria	DNA_Metabolism	DNA_repair_UvrABC_system	Excinuclease_ABC_subunit_A_paralog_of_unknown_function	4.10153	5.08111	0.00092868	0.0232975
k119_401845	Bacteria	DNA_Metabolism	DNA_repair_UvrABC_system	Excinuclease_ABC_subunit_A_paralog_of_unknown_function	3.23729	3.73035	0.0123548	0.0846498
k119_279018	Actinobacteria	DNA_Metabolism	DNA_repair_UvrABC_system	Excinuclease_ABC_subunit_A_paralog_of_unknown_function	7.38293	3.61287	0.00322419	0.0427775
k119_569456	Archaea	DNA_Metabolism	DNA_repair_UvrABC_system	Excinuclease_ABC_subunit_B	3.41149	5.162	0.00544378	0.0554952
k119_449724	Rubrobacter	DNA_Metabolism	DNA_repair_UvrABC_system	Excinuclease_ABC_subunit_B	2.42945	5.00478	0.00225666	0.0360704
k119_136483	Rubrobacter	DNA_Metabolism	DNA_repair_UvrABC_system	Excinuclease_ABC_subunit_B	3.78298	4.97002	0.00127149	0.0269445
k119_257904	Rubrobacter	DNA_Metabolism	DNA_repair_UvrABC_system	Excinuclease_ABC_subunit_B	3.4508	4.68483	0.00260539	0.0385586
k119_287512	Rubrobacter	DNA_Metabolism	DNA_repair_UvrABC_system	Excinuclease_ABC_subunit_B	2.18798	4.46888	0.0108796	0.0789646
k119_550919	Terrabacteria group	DNA_Metabolism	DNA_repair_UvrABC_system	Excinuclease_ABC_subunit_B	3.44577	4.4001	0.00457854	0.0509204
k119_67755	Rubrobacter	DNA_Metabolism	DNA_repair_UvrABC_system	Excinuclease_ABC_subunit_B	4.43736	4.15115	0.00314305	0.0422795
k119_421999	Rubrobacter	DNA_Metabolism	DNA_repair_UvrABC_system	Excinuclease_ABC_subunit_B	4.7998	3.63894	0.00930666	0.0730888
k119_244185	Terrabacteria group	DNA_Metabolism	DNA_repair_UvrABC_system	Excinuclease_ABC_subunit_B	6.25797	3.54204	0.00507289	0.0535738
k119_189667	Rubrobacter	DNA_Metabolism	DNA_repair_UvrABC_system	Excinuclease_ABC_subunit_B	9.4268	3.30174	0.00512879	0.0539252
k119_167626	Rubrobacter	DNA_Metabolism	DNA_repair_UvrABC_system	Excinuclease_ABC_subunit_B	4.00055	3.18557	0.0125917	0.0855746
k119_176691	Rubrobacter	DNA_Metabolism	DNA_repair_UvrABC_system	Excinuclease_ABC_subunit_C	2.26561	4.79389	0.00647265	0.0607412
k119_66337	Rubrobacter	DNA_Metabolism	DNA_repair_UvrABC_system	Excinuclease_ABC_subunit_C	2.4686	4.10581	0.014921	0.0938117
k119_443943	Rubrobacter	DNA_Metabolism	DNA_repair_UvrABC_system	Excinuclease_ABC_subunit_C	5.27366	3.49511	0.00859715	0.0703552
k119_193319	Rubrobacter	DNA_Metabolism	DNA_replication	Chromosomal_replication_initiator_protein_DnaA	14.5495	5.14366	6.17581e-05	0.00488258
k119_548541	Rubrobacter	DNA_Metabolism	DNA_replication	Chromosomal_replication_initiator_protein_DnaA	2.34396	5.12964	0.00233143	0.0366863
k119_222113	Rubrobacter	DNA_Metabolism	DNA_replication	Chromosomal_replication_initiator_protein_DnaA	7.67152	5.04494	0.000808888	0.0216895
k119_307185	Rubrobacter aplysinae	DNA_Metabolism	DNA_replication	Chromosomal_replication_initiator_protein_DnaA	2.83052	4.60418	0.0089864	0.0717645
k119_416596	Rubrobacter	DNA_Metabolism	DNA_replication	Chromosomal_replication_initiator_protein_DnaA	3.85187	3.91626	0.00956715	0.0741429
k119_84586	Rubrobacter	DNA_Metabolism	DNA_replication	Chromosomal_replication_initiator_protein_DnaA	5.0738	3.70456	0.00270497	0.0391669
k119_534379	Rubrobacter	DNA_Metabolism	DNA_replication	Crossover_junction_endodeoxyribonuclease_RuvC_(EC_3.1.22.4)	3.98292	5.0524	0.00264861	0.0387864
k119_498649	Rubrobacter xylanophilus	DNA_Metabolism	DNA_replication	Crossover_junction_endodeoxyribonuclease_RuvC_(EC_3.1.22.4)	2.65805	4.67691	0.00918869	0.0726347
k119_112468	Terrabacteria group	DNA_Metabolism	DNA_replication	Crossover_junction_endodeoxyribonuclease_RuvC_(EC_3.1.22.4)	2.28548	3.9927	0.0126273	0.0857609
k119_227012	Rubrobacter	DNA_Metabolism	DNA_replication	DNA_polymerase_III_alpha_subunit_(EC_2.7.7.7)	2.43226	5.23798	0.00100068	0.0241489
k119_501861	Bacteria	DNA_Metabolism	DNA_replication	DNA_polymerase_III_alpha_subunit_(EC_2.7.7.7)	3.74269	4.76548	0.0152488	0.0949678
k119_199757	Rubrobacter	DNA_Metabolism	DNA_replication	DNA_polymerase_III_alpha_subunit_(EC_2.7.7.7)	2.87698	4.60121	0.00479387	0.0521015
k119_264582	Rubrobacter	DNA_Metabolism	DNA_replication	DNA_polymerase_III_alpha_subunit_(EC_2.7.7.7)	2.42189	4.39739	0.0117969	0.0826597
k119_418247	Rubrobacter	DNA_Metabolism	DNA_replication	DNA_polymerase_III_alpha_subunit_(EC_2.7.7.7)	3.73439	4.32808	0.00234756	0.0367523
k119_315382	Rubrobacter	DNA_Metabolism	DNA_replication	DNA_polymerase_III_alpha_subunit_(EC_2.7.7.7)	3.32336	4.2268	0.00280146	0.0398111
k119_235953	Rubrobacter	DNA_Metabolism	DNA_replication	DNA_polymerase_III_alpha_subunit_(EC_2.7.7.7)	3.25157	3.66403	0.0122847	0.0844087
k119_304105	Rubrobacter	DNA_Metabolism	DNA_replication	DNA_polymerase_III_beta_subunit_(EC_2.7.7.7)	3.1671	4.83509	0.01121	0.0804508
k119_118719	Rubrobacter	DNA_Metabolism	DNA_replication	DNA_polymerase_III_beta_subunit_(EC_2.7.7.7)	6.54013	4.04255	0.000338191	0.0136187
k119_374961	Rubrobacter	DNA_Metabolism	DNA_replication	DNA_polymerase_III_beta_subunit_(EC_2.7.7.7)	6.7723	3.28315	0.00266284	0.038894
k119_570911	Rubrobacter xylanophilus	DNA_Metabolism	DNA_replication	DNA_polymerase_III_delta_prime_subunit_(EC_2.7.7.7)	2.30678	4.84597	0.0037553	0.0460128
k119_517149	Rubrobacter	DNA_Metabolism	DNA_replication	Helicase_loader_DnaI	3.17576	4.32123	0.00838423	0.0693158
k119_577852	Rubrobacter	DNA_Metabolism	DNA_replication	Helicase_loader_DnaI	6.16479	3.99969	0.000477895	0.0163433
k119_149677	Rubrobacter	DNA_Metabolism	DNA_replication	Helicase_loader_DnaI	3.92933	3.34579	0.00663832	0.0615782
k119_498649	Rubrobacter xylanophilus	DNA_Metabolism	DNA_replication	Holliday_junction_DNA_helicase_RuvA	2.65805	4.67691	0.00918869	0.0726347
k119_112468	Terrabacteria group	DNA_Metabolism	DNA_replication	Holliday_junction_DNA_helicase_RuvA	2.28548	3.9927	0.0126273	0.0857609
k119_498649	Rubrobacter xylanophilus	DNA_Metabolism	DNA_replication	Holliday_junction_DNA_helicase_RuvB	2.65805	4.67691	0.00918869	0.0726347
k119_303916	Rubrobacter	DNA_Metabolism	DNA_replication	Replicative_DNA_helicase_(EC_3.6.1._)_[SA14_24]	2.68098	5.02226	0.00117697	0.026005
k119_485976	Rubrobacter	DNA_Metabolism	DNA_replication	Replicative_DNA_helicase_(EC_3.6.1._)_[SA14_24]	2.81347	3.86628	0.00845102	0.0695929
k119_258740	Rubrobacter xylanophilus	DNA_Metabolism	DNA_replication	Transcription_repair_coupling_factor	2.65509	4.8839	0.00736811	0.0650531
k119_289892	Thaumarchaeota	DNA_Metabolism	DNA_replication_archaeal	Archaeal_DNA_polymerase_I_(EC_2.7.7.7)	2.85693	4.95957	0.00839848	0.0693715
k119_246434	Nitrososphaera	DNA_Metabolism	DNA_replication_archaeal	Archaeal_DNA_polymerase_II_large_subunit_(EC_2.7.7.7)	2.58685	4.80627	0.0104355	0.0774726
k119_477767	Thaumarchaeota	DNA_Metabolism	DNA_replication_archaeal	Archaeal_DNA_polymerase_II_large_subunit_(EC_2.7.7.7)	2.5845	4.76848	0.00987455	0.0752703
k119_225253	Thaumarchaeota	DNA_Metabolism	DNA_replication_archaeal	Archaeal_DNA_polymerase_II_small_subunit_(EC_2.7.7.7)	2.36751	5.05626	0.016681	0.0998239
k119_345528	Thaumarchaeota	DNA_Metabolism	DNA_replication_archaeal	DNA_primase_large_subunit_(EC_2.7.7._)	2.83306	4.99666	0.00264446	0.0387717
k119_457510	Nitrososphaera	DNA_Metabolism	DNA_replication_archaeal	DNA_replication_helicase_protein_MCM	3.17641	5.20312	0.0034796	0.0444769
k119_115289	Candidatus Nitrososphaera gargensis Ga9.2	DNA_Metabolism	DNA_replication_archaeal	Origin_of_replication_recognition_protein	2.82054	4.97372	0.00678088	0.062314
k119_531453	Rubrobacter	DNA_Metabolism	DNA_structural_proteins_bacterial	DNA_binding_protein_HBsu	6.24677	5.28713	0.000157771	0.00883207
k119_207549	Bacteria	DNA_Metabolism	DNA_structural_proteins_bacterial	DNA_binding_protein_HBsu	4.86301	5.22224	0.000821443	0.0218458
k119_406540	Bacteria	DNA_Metabolism	DNA_structural_proteins_bacterial	DNA_binding_protein_HBsu	4.75339	5.11934	0.000702732	0.0201739
k119_301966	cellular organisms	DNA_Metabolism	DNA_structural_proteins_bacterial	DNA_binding_protein_HBsu	5.42835	5.06539	0.000496287	0.0166378
k119_473667	Bacteria	DNA_Metabolism	DNA_structural_proteins_bacterial	DNA_binding_protein_HBsu	4.43255	4.81921	0.00103297	0.0244621
k119_320589	Terrabacteria group	DNA_Metabolism	DNA_structural_proteins_bacterial	DNA_binding_protein_HBsu	4.44452	4.68383	0.00159506	0.0302211
k119_438402	Rubrobacter	DNA_Metabolism	DNA_structural_proteins_bacterial	DNA_binding_protein_HBsu	3.41789	4.63343	0.00449524	0.0504666
k119_122901	Rubrobacter radiotolerans	DNA_Metabolism	DNA_structural_proteins_bacterial	DNA_binding_protein_HBsu	2.1254	4.50395	0.00870942	0.0708469
k119_105620	Rubrobacter	DNA_Metabolism	DNA_structural_proteins_bacterial	DNA_binding_protein_HBsu	9.74626	4.37424	0.000628083	0.018959
k119_393994	Bacteria	DNA_Metabolism	DNA_structural_proteins_bacterial	DNA_binding_protein_HBsu	2.99815	4.25169	0.00683413	0.0625263
k119_574325	Bacteria	DNA_Metabolism	DNA_structural_proteins_bacterial	DNA_binding_protein_HBsu	4.10179	4.13489	0.00855309	0.0701234
k119_59629	Bacteria	DNA_Metabolism	DNA_structural_proteins_bacterial	DNA_binding_protein_HBsu	5.76913	3.79106	0.00323816	0.0428819
k119_12483	Rubrobacter	DNA_Metabolism	DNA_structural_proteins_bacterial	DNA_binding_protein_HBsu	6.76699	3.76304	0.00504656	0.0534485
k119_214642	Bacteria	DNA_Metabolism	DNA_structural_proteins_bacterial	DNA_binding_protein_HBsu	5.2037	3.279	0.00579872	0.0573539
k119_315673	Rubrobacter	DNA_Metabolism	DNA_structural_proteins_bacterial	DNA_binding_protein_HBsu	19.3086	2.57893	0.00813461	0.0684206
k119_513961	Bacteria	DNA_Metabolism	DNA_structural_proteins_bacterial	DNA_binding_protein_HU_beta	3.34819	4.3945	0.00977809	0.074896
k119_314687	Rubrobacter	DNA_Metabolism	DNA_topoisomerases_Type_I_ATP_independent	DNA_topoisomerase_I_(EC_5.99.1.2)	3.80246	5.39454	0.00031906	0.0132144
k119_458259	Rubrobacter	DNA_Metabolism	DNA_topoisomerases_Type_I_ATP_independent	DNA_topoisomerase_I_(EC_5.99.1.2)	5.09523	3.90659	0.00210879	0.034856
k119_391228	Rubrobacter	DNA_Metabolism	DNA_topoisomerases_Type_II_ATP_dependent	DNA_gyrase_subunit_A_(EC_5.99.1.3)	3.07886	5.38058	0.00113074	0.0255833
k119_235861	Rubrobacter	DNA_Metabolism	DNA_topoisomerases_Type_II_ATP_dependent	DNA_gyrase_subunit_A_(EC_5.99.1.3)	4.92696	5.02692	0.000884388	0.0227308
k119_452456	Actinobacteria <phylum>	DNA_Metabolism	DNA_topoisomerases_Type_II_ATP_dependent	DNA_gyrase_subunit_A_(EC_5.99.1.3)	4.42533	4.73872	0.0054633	0.0555755
k119_367861	Rubrobacter	DNA_Metabolism	DNA_topoisomerases_Type_II_ATP_dependent	DNA_gyrase_subunit_A_(EC_5.99.1.3)	3.17636	4.35357	0.00483179	0.0522906
k119_525419	Bacteria	DNA_Metabolism	DNA_topoisomerases_Type_II_ATP_dependent	DNA_gyrase_subunit_A_(EC_5.99.1.3)	3.76064	4.24365	0.00280374	0.0398192
k119_76088	Geodermatophilaceae	DNA_Metabolism	DNA_topoisomerases_Type_II_ATP_dependent	DNA_gyrase_subunit_A_(EC_5.99.1.3)	2.69056	4.03062	0.012677	0.0859487
k119_504478	Rubrobacter	DNA_Metabolism	DNA_topoisomerases_Type_II_ATP_dependent	DNA_gyrase_subunit_A_(EC_5.99.1.3)	3.14825	3.93058	0.0142323	0.091538
k119_442773	Rubrobacter	DNA_Metabolism	DNA_topoisomerases_Type_II_ATP_dependent	DNA_gyrase_subunit_B_(EC_5.99.1.3)	3.08684	4.93463	0.00102239	0.0243391
k119_548301	Bacteria	DNA_Metabolism	DNA_topoisomerases_Type_II_ATP_dependent	DNA_gyrase_subunit_B_(EC_5.99.1.3)	4.88014	4.76712	0.00304562	0.0415896
k119_374768	Rubrobacter	DNA_Metabolism	DNA_topoisomerases_Type_II_ATP_dependent	DNA_gyrase_subunit_B_(EC_5.99.1.3)	3.09515	4.51224	0.00459635	0.0510064
k119_101088	cellular organisms	DNA_Metabolism	DNA_topoisomerases_Type_II_ATP_dependent	DNA_gyrase_subunit_B_(EC_5.99.1.3)	2.91236	4.41583	0.00851463	0.0699089
k119_373904	Rubrobacter	DNA_Metabolism	DNA_topoisomerases_Type_II_ATP_dependent	DNA_gyrase_subunit_B_(EC_5.99.1.3)	2.86101	4.36815	0.00605643	0.0586545
k119_250894	Rubrobacter	DNA_Metabolism	DNA_topoisomerases_Type_II_ATP_dependent	DNA_gyrase_subunit_B_(EC_5.99.1.3)	2.85582	4.27694	0.00758177	0.0659899
k119_56676	Rubrobacter	DNA_Metabolism	DNA_topoisomerases_Type_II_ATP_dependent	DNA_gyrase_subunit_B_(EC_5.99.1.3)	2.28498	4.00735	0.0137519	0.0898161
k119_240644	Rubrobacter	DNA_Metabolism	DNA_topoisomerases_Type_II_ATP_dependent	DNA_gyrase_subunit_B_(EC_5.99.1.3)	7.45312	3.84628	0.000902679	0.0229534
k119_508357	Rubrobacter	DNA_Metabolism	DNA_topoisomerases_Type_II_ATP_dependent	DNA_gyrase_subunit_B_(EC_5.99.1.3)	4.328	3.82458	0.00929389	0.0730756
k119_504980	Rubrobacter	DNA_Metabolism	DNA_topoisomerases_Type_II_ATP_dependent	DNA_gyrase_subunit_B_(EC_5.99.1.3)	3.22904	3.65046	0.0093449	0.0732039
k119_496420	Rubrobacter	DNA_Metabolism	DNA_topoisomerases_Type_II_ATP_dependent	DNA_gyrase_subunit_B_(EC_5.99.1.3)	5.32629	3.2569	0.0119801	0.0833497
k119_480428	Candidatus Nitrososphaera gargensis Ga9.2	DNA_Metabolism	DNA_topoisomerases_Type_II_ATP_dependent	DNA_topoisomerase_VI_subunit_B_(EC_5.99.1.3)	3.0674	5.31096	0.00109878	0.0251841
k119_8761	cellular organisms	DNA_Metabolism	Restriction_Modification_System	Type_I_restriction_modification_system_restriction_subunit_R_(EC_3.1.21.3)	2.23233	4.93236	0.00479199	0.0520887
k119_253247	cellular organisms	DNA_Metabolism	Restriction_Modification_System	Type_I_restriction_modification_system_restriction_subunit_R_(EC_3.1.21.3)	2.53777	4.88508	0.0157328	0.0965346
k119_116054	Rubrobacter	DNA_Metabolism	Uracil_DNA_glycosylase	Uracil_DNA_glycosylase_family_4	2.8686	4.92638	0.00309251	0.0418934
k119_571853	Thaumarchaeota	DNA_Metabolism	Uracil_DNA_glycosylase	Uracil_DNA_glycosylase_family_4	2.62078	4.64462	0.0154078	0.0954889
k119_351335	Rubrobacter	DNA_Metabolism	Uracil_DNA_glycosylase	Uracil_DNA_glycosylase_family_4	3.09919	4.59059	0.00219318	0.0355558
k119_490114	Rubrobacter xylanophilus	DNA_Metabolism	Uracil_DNA_glycosylase	Uracil_DNA_glycosylase_family_4	3.03701	4.49708	0.00865793	0.0706295
k119_76631	Rubrobacter xylanophilus	DNA_Metabolism	YcfH	Putative_deoxyribonuclease_YcfH	4.55118	4.37126	0.00737906	0.0650756
k119_49319	Bacteria	Dormancy_and_Sporulation	F1453_mlsummers	two_component_response_regulator	3.52028	4.75913	0.00818315	0.0685966
k119_38033	Actinobacteria <phylum>	Dormancy_and_Sporulation	Sporulation_associated_proteins_with_broader_functions	RNA_polymerase_sporulation_specific_sigma_factor_SigH	2.86814	4.7458	0.00795909	0.067662
k119_248836	Thermoleophilia	Dormancy_and_Sporulation	Sporulation_associated_proteins_with_broader_functions	RNA_polymerase_sporulation_specific_sigma_factor_SigH	5.64254	4.05974	0.0100027	0.0758095
k119_332757	Terrabacteria group	Dormancy_and_Sporulation	Sporulation_gene_orphans	Stage_V_sporulation_protein_involved_in_spore_cortex_synthesis_(SpoVR)	2.30197	3.85753	0.0163081	0.0985262
k119_301288	Rubrobacter	Fatty_Acids_Lipids_and_Isoprenoids	Acetyl_CoA_carboxylase_complexes_in_plants	Biotin_carboxyl_carrier_protein_of_acetyl_CoA_carboxylase	3.23111	5.04766	0.00620147	0.0593268
k119_584154	Rubrobacter	Fatty_Acids_Lipids_and_Isoprenoids	Acetyl_CoA_carboxylase_complexes_in_plants	Biotin_carboxyl_carrier_protein_of_acetyl_CoA_carboxylase	3.04712	4.76472	0.00152153	0.0295563
k119_361924	Rubrobacter	Fatty_Acids_Lipids_and_Isoprenoids	Cardiolipin_biosynthesis_in_plants	Cardiolipin_synthetase_(EC_2.7.8._)	3.53623	5.51873	0.000488025	0.016506
k119_564694	Rubrobacter xylanophilus	Fatty_Acids_Lipids_and_Isoprenoids	Cardiolipin_biosynthesis_in_plants	Cardiolipin_synthetase_(EC_2.7.8._)	5.11816	4.42952	0.00365754	0.0455383
k119_366827	Rubrobacter	Fatty_Acids_Lipids_and_Isoprenoids	Cardiolipin_biosynthesis_in_plants	CDP_diacylglycerol__glycerol_3_phosphate_3_phosphatidyltransferase_(EC_2.7.8.5)	3.11884	4.36968	0.0143897	0.0920376
k119_68466	Terrabacteria group	Fatty_Acids_Lipids_and_Isoprenoids	Carotenoid_biosynthesis	Beta_carotene_ketolase_(EC_1.14._._)	3.52504	5.58494	0.00103501	0.0244661
k119_120006	Actinobacteria <phylum>	Fatty_Acids_Lipids_and_Isoprenoids	Carotenoid_biosynthesis	Beta_carotene_ketolase_(EC_1.14._._)	4.05542	5.51919	0.000493948	0.0165908
k119_298307	cellular organisms	Fatty_Acids_Lipids_and_Isoprenoids	Carotenoid_biosynthesis	Beta_carotene_ketolase_(EC_1.14._._)	3.14497	4.753	0.00521009	0.05437
k119_131431	Thermomicrobia	Fatty_Acids_Lipids_and_Isoprenoids	Carotenoid_biosynthesis	Beta_carotene_ketolase_(EC_1.14._._)	2.15055	4.5565	0.00998105	0.0756995
k119_361199	Bacteria	Fatty_Acids_Lipids_and_Isoprenoids	Carotenoid_biosynthesis	Beta_carotene_ketolase_(EC_1.14._._)	2.34922	4.38497	0.00984921	0.0751779
k119_259992	Terrabacteria group	Fatty_Acids_Lipids_and_Isoprenoids	Carotenoid_biosynthesis	Phytoene_dehydrogenase_and_related_proteins	3.92348	5.61976	0.00164867	0.03075
k119_454629	Rubrobacter	Fatty_Acids_Lipids_and_Isoprenoids	Carotenoid_biosynthesis	Phytoene_dehydrogenase_and_related_proteins	2.14547	4.71915	0.00447138	0.0503441
k119_34787	Rubrobacter	Fatty_Acids_Lipids_and_Isoprenoids	Carotenoid_biosynthesis	Phytoene_dehydrogenase_and_related_proteins	4.51906	3.89851	0.00340583	0.0439614
k119_298839	Bacteria	Fatty_Acids_Lipids_and_Isoprenoids	Carotenoid_biosynthesis	Phytoene_desaturase_neurosporene_or_lycopene_producing_(EC_1.3._._)	2.28207	4.86978	0.00405386	0.0479913
k119_54246	Rubrobacter	Fatty_Acids_Lipids_and_Isoprenoids	Carotenoid_biosynthesis	Phytoene_synthase_(EC_2.5.1.32)	2.11329	3.86339	0.0160183	0.0975485
k119_443795	Nocardioidaceae	Fatty_Acids_Lipids_and_Isoprenoids	CDP_diacylglycerol_biosynthesis_in_plants	1_acyl_sn_glycerol_3_phosphate_acyltransferase_(EC_2.3.1.51)	4.78458	4.49592	0.00217873	0.0354356
k119_462681	Rubrobacter xylanophilus	Fatty_Acids_Lipids_and_Isoprenoids	Fatty_Acid_Biosynthesis_FASII	Enoyl_[acyl_carrier_protein]_reductase_[FMN]_(EC_1.3.1.9)	4.39109	5.82548	0.000376285	0.0143659
k119_93989	Bacteria	Fatty_Acids_Lipids_and_Isoprenoids	Fatty_Acid_Biosynthesis_FASII	Enoyl_[acyl_carrier_protein]_reductase_[FMN]_(EC_1.3.1.9)	3.25876	5.24901	0.00453451	0.0506762
k119_138858	Bacteria	Fatty_Acids_Lipids_and_Isoprenoids	Fatty_Acid_Biosynthesis_FASII	Enoyl_[acyl_carrier_protein]_reductase_[FMN]_(EC_1.3.1.9)	2.23484	4.59264	0.0167169	0.0999523
k119_545641	Rubrobacter xylanophilus	Fatty_Acids_Lipids_and_Isoprenoids	Fatty_Acid_Biosynthesis_FASII	Enoyl_[acyl_carrier_protein]_reductase_[NADPH]_(EC_1.3.1.10)	4.4984	4.34961	0.00181556	0.0322575
k119_581384	Rubrobacter xylanophilus	Fatty_Acids_Lipids_and_Isoprenoids	Glycerolipid_and_Glycerophospholipid_Metabolism_in_Bacteria	Acyl_phosphate:glycerol_3_phosphate_O_acyltransferase_PlsY	6.72463	4.66195	0.000144235	0.00837243
k119_125899	Rubrobacter	Fatty_Acids_Lipids_and_Isoprenoids	Glycerolipid_and_Glycerophospholipid_Metabolism_in_Bacteria	Acyl_phosphate:glycerol_3_phosphate_O_acyltransferase_PlsY	3.1692	4.12123	0.0143889	0.0920376
k119_456180	Rubrobacter	Fatty_Acids_Lipids_and_Isoprenoids	Glycerolipid_and_Glycerophospholipid_Metabolism_in_Bacteria	Acyl_phosphate:glycerol_3_phosphate_O_acyltransferase_PlsY	5.33489	4.09101	0.00115408	0.0258415
k119_233808	Rubrobacter xylanophilus	Fatty_Acids_Lipids_and_Isoprenoids	Glycerolipid_and_Glycerophospholipid_Metabolism_in_Bacteria	Diacylglycerol_kinase_(EC_2.7.1.107)	3.3602	3.83856	0.012675	0.0859431
k119_548593	Rubrobacter	Fatty_Acids_Lipids_and_Isoprenoids	Isoprenoid_Biosynthesis	1_deoxy_D_xylulose_5_phosphate_reductoisomerase_(EC_1.1.1.267)	3.93712	4.06535	0.00794192	0.0676003
k119_377838	Rubrobacter	Fatty_Acids_Lipids_and_Isoprenoids	Isoprenoid_Biosynthesis	1_hydroxy_2_methyl_2_(E)_butenyl_4_diphosphate_synthase_(EC_1.17.7.1)	3.18522	4.97238	0.00385263	0.0467038
k119_153634	Rubrobacter	Fatty_Acids_Lipids_and_Isoprenoids	Isoprenoid_Biosynthesis	1_hydroxy_2_methyl_2_(E)_butenyl_4_diphosphate_synthase_(EC_1.17.7.1)	5.27696	3.43091	0.00293983	0.0407342
k119_338133	Rubrobacter	Fatty_Acids_Lipids_and_Isoprenoids	Isoprenoid_Biosynthesis	4_hydroxy_3_methylbut_2_enyl_diphosphate_reductase_(EC_1.17.1.2)	3.27174	5.10311	0.000490291	0.0165206
k119_464048	Rubrobacter	Fatty_Acids_Lipids_and_Isoprenoids	Isoprenoid_Biosynthesis	4_hydroxy_3_methylbut_2_enyl_diphosphate_reductase_(EC_1.17.1.2)	3.97999	4.74508	0.00316698	0.0424258
k119_4805	Rubrobacter	Fatty_Acids_Lipids_and_Isoprenoids	Isoprenoid_Biosynthesis	4_hydroxy_3_methylbut_2_enyl_diphosphate_reductase_(EC_1.17.1.2)	2.25791	4.59529	0.0115808	0.08187
k119_115809	Rubrobacter	Fatty_Acids_Lipids_and_Isoprenoids	Isoprenoid_Biosynthesis	4_hydroxy_3_methylbut_2_enyl_diphosphate_reductase_(EC_1.17.1.2)	3.82783	4.58543	0.00287809	0.0403326
k119_4786	Rubrobacter	Fatty_Acids_Lipids_and_Isoprenoids	Isoprenoid_Biosynthesis	4_hydroxy_3_methylbut_2_enyl_diphosphate_reductase_(EC_1.17.1.2)	2.16068	4.27178	0.0105504	0.0778056
k119_83539	Rubrobacter	Fatty_Acids_Lipids_and_Isoprenoids	Isoprenoid_Biosynthesis	4_hydroxy_3_methylbut_2_enyl_diphosphate_reductase_(EC_1.17.1.2)	3.98917	4.06368	0.00498943	0.053097
k119_490411	Rubrobacter	Fatty_Acids_Lipids_and_Isoprenoids	Isoprenoid_Biosynthesis	4_hydroxy_3_methylbut_2_enyl_diphosphate_reductase_(EC_1.17.1.2)	7.05018	2.82634	0.0104129	0.0773768
k119_68118	Bacteria	Fatty_Acids_Lipids_and_Isoprenoids	Mycobacterial_FadD_proteins_(fatty_acid_CoA__and_AMP__ligases)	3_methylmercaptopropionyl_CoA_ligase_(DmdB)	6.21653	5.72244	0.000163622	0.00902675
k119_29406	Bacteria	Fatty_Acids_Lipids_and_Isoprenoids	Mycobacterial_FadD_proteins_(fatty_acid_CoA__and_AMP__ligases)	3_methylmercaptopropionyl_CoA_ligase_(DmdB)	3.10245	4.51059	0.00923979	0.0728127
k119_47964	Bacteria	Fatty_Acids_Lipids_and_Isoprenoids	Mycobacterial_FadD_proteins_(fatty_acid_CoA__and_AMP__ligases)	3_methylmercaptopropionyl_CoA_ligase_(DmdB)	4.18599	3.8021	0.00568957	0.0567988
k119_414408	Oscillatoriales	Fatty_Acids_Lipids_and_Isoprenoids	Myxoxanthophyll_biosynthesis_in_Cyanobacteria	2'_O_glycosyltransferase_CruG	5.44663	4.63694	0.00379893	0.0463278
k119_25477	Rubrobacter	Fatty_Acids_Lipids_and_Isoprenoids	Polyhydroxybutyrate_metabolism	Polyhydroxyalkanoic_acid_synthase	3.86052	5.05518	0.00213078	0.0350453
k119_316694	Bacteria	Fatty_Acids_Lipids_and_Isoprenoids	Polyhydroxybutyrate_metabolism	Polyhydroxyalkanoic_acid_synthase	2.88798	4.94944	0.00154638	0.0298049
k119_109369	Rubrobacter radiotolerans	Fatty_Acids_Lipids_and_Isoprenoids	Polyhydroxybutyrate_metabolism	Polyhydroxyalkanoic_acid_synthase	3.39449	4.89536	0.00459934	0.0510152
k119_409668	Bacteria	Fatty_Acids_Lipids_and_Isoprenoids	Polyhydroxybutyrate_metabolism	Polyhydroxyalkanoic_acid_synthase	4.62192	4.75204	0.00123266	0.026579
k119_310365	Rubrobacter xylanophilus	Fatty_Acids_Lipids_and_Isoprenoids	Polyhydroxybutyrate_metabolism	Polyhydroxyalkanoic_acid_synthase	2.41222	4.72433	0.012389	0.0848052
k119_51337	Terrabacteria group	Fatty_Acids_Lipids_and_Isoprenoids	Polyhydroxybutyrate_metabolism	Polyhydroxyalkanoic_acid_synthase	2.19208	4.42292	0.00576327	0.0571409
k119_571052	Bacteria	Fatty_Acids_Lipids_and_Isoprenoids	Polyhydroxybutyrate_metabolism	Polyhydroxyalkanoic_acid_synthase	2.52141	4.26883	0.0117297	0.0823733
k119_354457	Terrabacteria group	Fatty_Acids_Lipids_and_Isoprenoids	Polyhydroxybutyrate_metabolism	Polyhydroxyalkanoic_acid_synthase	3.09269	3.76886	0.0133933	0.0885467
k119_433234	Bacteria	Fatty_Acids_Lipids_and_Isoprenoids	Polyhydroxybutyrate_metabolism	Polyhydroxyalkanoic_acid_synthase	6.06554	3.46217	0.00382034	0.0464998
k119_494716	Terrabacteria group	Fatty_Acids_Lipids_and_Isoprenoids	Polyhydroxybutyrate_metabolism	Polyhydroxyalkanoic_acid_synthase	4.02908	3.44001	0.00916376	0.072554
k119_349638	Rubrobacter	Fatty_Acids_Lipids_and_Isoprenoids	Polyhydroxybutyrate_metabolism	Polyhydroxyalkanoic_acid_synthase	3.80892	3.36464	0.0130892	0.0874755
k119_73687	Bacteria	Fatty_Acids_Lipids_and_Isoprenoids	Polyhydroxybutyrate_metabolism	Polyhydroxyalkanoic_acid_synthase	5.92835	3.33066	0.00478984	0.0520807
k119_30170	Rubrobacter xylanophilus	Fatty_Acids_Lipids_and_Isoprenoids	Polyhydroxybutyrate_metabolism	Polyhydroxyalkanoic_acid_synthase	4.37809	3.01394	0.0143872	0.0920376
k119_359991	Bacteria	Fatty_Acids_Lipids_and_Isoprenoids	Polyhydroxybutyrate_metabolism	Polyhydroxyalkanoic_acid_synthase	8.41858	2.52314	0.014892	0.0936852
k119_444826	Streptomyces	Iron_acquisition_and_metabolism	Ferrous_iron_transporter_EfeUOB_low_pH_induced	Ferrous_iron_transport_permease_EfeU	2.36585	4.46751	0.0101373	0.0763748
k119_95976	Rubrobacter	Membrane_Transport	ABC_transporter_alkylphosphonate_(TC_3.A.1.9.1)	Phosphonate_ABC_transporter_permease_protein_phnE2_(TC_3.A.1.9.1)	4.61228	4.85345	0.000812949	0.0217259
k119_324009	unclassified Thaumarchaeota	Membrane_Transport	ABC_transporter_alkylphosphonate_(TC_3.A.1.9.1)	Phosphonate_ABC_transporter_permease_protein_phnE2_(TC_3.A.1.9.1)	3.56485	4.51163	0.00479053	0.0520807
k119_577459	unclassified Acidobacteria (miscellaneous)	Membrane_Transport	ABC_transporter_alkylphosphonate_(TC_3.A.1.9.1)	Phosphonate_ABC_transporter_phosphate_binding_periplasmic_component_(TC_3.A.1.9.1)	4.29486	5.87861	0.000128043	0.00779373
k119_154030	Rubrobacter	Membrane_Transport	ABC_transporter_branched_chain_amino_acid_(TC_3.A.1.4.1)	Branched_chain_amino_acid_ABC_transporter_amino_acid_binding_protein_(TC_3.A.1.4.1)	2.91764	4.57504	0.00936939	0.073318
k119_158283	Rubrobacter xylanophilus	Membrane_Transport	ABC_transporter_branched_chain_amino_acid_(TC_3.A.1.4.1)	Branched_chain_amino_acid_ABC_transporter_amino_acid_binding_protein_(TC_3.A.1.4.1)	5.28536	4.32928	0.000357013	0.0139647
k119_365894	Rubrobacter	Membrane_Transport	ABC_transporter_branched_chain_amino_acid_(TC_3.A.1.4.1)	Branched_chain_amino_acid_ABC_transporter_amino_acid_binding_protein_(TC_3.A.1.4.1)	3.74981	3.54798	0.0138861	0.0903333
k119_188199	Bacteria	Membrane_Transport	ABC_transporter_branched_chain_amino_acid_(TC_3.A.1.4.1)	Branched_chain_amino_acid_transport_ATP_binding_protein_LivF_(TC_3.A.1.4.1)	5.49116	5.26751	0.0124007	0.0848305
k119_571516	Rubrobacter	Membrane_Transport	ABC_transporter_branched_chain_amino_acid_(TC_3.A.1.4.1)	Branched_chain_amino_acid_transport_ATP_binding_protein_LivF_(TC_3.A.1.4.1)	2.14548	4.80044	0.00715574	0.0640386
k119_556742	Rubrobacter	Membrane_Transport	ABC_transporter_branched_chain_amino_acid_(TC_3.A.1.4.1)	Branched_chain_amino_acid_transport_ATP_binding_protein_LivF_(TC_3.A.1.4.1)	3.70861	4.6016	0.00727189	0.0646007
k119_556742	Rubrobacter	Membrane_Transport	ABC_transporter_branched_chain_amino_acid_(TC_3.A.1.4.1)	Branched_chain_amino_acid_transport_ATP_binding_protein_LivG_(TC_3.A.1.4.1)	3.70861	4.6016	0.00727189	0.0646007
k119_171991	Rubrobacter	Membrane_Transport	ABC_transporter_branched_chain_amino_acid_(TC_3.A.1.4.1)	Branched_chain_amino_acid_transport_ATP_binding_protein_LivG_(TC_3.A.1.4.1)	4.15448	3.29914	0.0159527	0.0973098
k119_136127	Rubrobacter	Membrane_Transport	ABC_transporter_branched_chain_amino_acid_(TC_3.A.1.4.1)	Branched_chain_amino_acid_transport_system_permease_protein_LivM_(TC_3.A.1.4.1)	2.76569	3.80332	0.0121913	0.0840041
k119_183122	Rubrobacter	Membrane_Transport	ABC_transporter_branched_chain_amino_acid_(TC_3.A.1.4.1)	High_affinity_branched_chain_amino_acid_transport_system_permease_protein_LivH_(TC_3.A.1.4.1)	2.42286	4.64782	0.00590081	0.057813
k119_298983	Rubrobacter xylanophilus	Membrane_Transport	ABC_transporter_dipeptide_(TC_3.A.1.5.2)	Dipeptide_binding_ABC_transporter_periplasmic_substrate_binding_component_(TC_3.A.1.5.2)	3.55885	5.08372	0.000854168	0.0223426
k119_330798	Rubrobacter xylanophilus	Membrane_Transport	ABC_transporter_dipeptide_(TC_3.A.1.5.2)	Dipeptide_binding_ABC_transporter_periplasmic_substrate_binding_component_(TC_3.A.1.5.2)	3.10278	3.86903	0.0146414	0.0928362
k119_324376	Rubrobacter xylanophilus DSM 9941	Membrane_Transport	ABC_transporter_dipeptide_(TC_3.A.1.5.2)	Dipeptide_transport_system_permease_protein_DppB_(TC_3.A.1.5.2)	3.88484	4.23833	0.00201527	0.0341043
k119_323805	Bacteria	Membrane_Transport	ABC_transporter_oligopeptide_(TC_3.A.1.5.1)	Oligopeptide_ABC_transporter_periplasmic_oligopeptide_binding_protein_OppA_(TC_3.A.1.5.1)	3.1956	4.54046	0.00508852	0.0536469
k119_577662	Actinobacteria	Membrane_Transport	ABC_transporter_oligopeptide_(TC_3.A.1.5.1)	Oligopeptide_ABC_transporter_periplasmic_oligopeptide_binding_protein_OppA_(TC_3.A.1.5.1)	5.7801	4.44291	0.00488491	0.0525666
k119_293516	unclassified Chloroflexi (miscellaneous)	Membrane_Transport	ABC_transporter_oligopeptide_(TC_3.A.1.5.1)	Oligopeptide_ABC_transporter_periplasmic_oligopeptide_binding_protein_OppA_(TC_3.A.1.5.1)	2.89715	4.09994	0.01538	0.0954221
k119_478367	Rubrobacter xylanophilus	Membrane_Transport	ABC_transporter_oligopeptide_(TC_3.A.1.5.1)	Oligopeptide_transport_ATP_binding_protein_OppD_(TC_3.A.1.5.1)	9.62661	5.62798	2.65583e-05	0.00283414
k119_97427	Terrabacteria group	Membrane_Transport	ABC_transporter_oligopeptide_(TC_3.A.1.5.1)	Oligopeptide_transport_ATP_binding_protein_OppD_(TC_3.A.1.5.1)	2.6543	5.05661	0.00480915	0.0521771
k119_327076	Rubrobacter xylanophilus	Membrane_Transport	ABC_transporter_oligopeptide_(TC_3.A.1.5.1)	Oligopeptide_transport_ATP_binding_protein_OppD_(TC_3.A.1.5.1)	2.4163	4.91111	0.00845504	0.0695975
k119_286327	Rubrobacter xylanophilus	Membrane_Transport	ABC_transporter_oligopeptide_(TC_3.A.1.5.1)	Oligopeptide_transport_ATP_binding_protein_OppD_(TC_3.A.1.5.1)	2.69414	4.86277	0.00329635	0.0432623
k119_281182	Rubrobacter	Membrane_Transport	ABC_transporter_oligopeptide_(TC_3.A.1.5.1)	Oligopeptide_transport_ATP_binding_protein_OppD_(TC_3.A.1.5.1)	2.10088	4.73553	0.00956805	0.0741429
k119_31528	Rubrobacter xylanophilus	Membrane_Transport	ABC_transporter_oligopeptide_(TC_3.A.1.5.1)	Oligopeptide_transport_ATP_binding_protein_OppD_(TC_3.A.1.5.1)	3.16208	4.56103	0.00389669	0.0468427
k119_477956	Rubrobacter xylanophilus	Membrane_Transport	ABC_transporter_oligopeptide_(TC_3.A.1.5.1)	Oligopeptide_transport_ATP_binding_protein_OppD_(TC_3.A.1.5.1)	3.488	4.1616	0.00907128	0.0721456
k119_486722	Actinobacteria	Membrane_Transport	ABC_transporter_oligopeptide_(TC_3.A.1.5.1)	Oligopeptide_transport_ATP_binding_protein_OppF_(TC_3.A.1.5.1)	2.79935	5.5002	0.00101304	0.0242614
k119_313813	Terrabacteria group	Membrane_Transport	ABC_transporter_oligopeptide_(TC_3.A.1.5.1)	Oligopeptide_transport_ATP_binding_protein_OppF_(TC_3.A.1.5.1)	3.60416	4.75061	0.00395896	0.0473448
k119_186621	Terrabacteria group	Membrane_Transport	ABC_transporter_oligopeptide_(TC_3.A.1.5.1)	Oligopeptide_transport_ATP_binding_protein_OppF_(TC_3.A.1.5.1)	3.37721	4.66439	0.00471998	0.0517015
k119_483154	Terrabacteria group	Membrane_Transport	ABC_transporter_oligopeptide_(TC_3.A.1.5.1)	Oligopeptide_transport_system_permease_protein_OppB_(TC_3.A.1.5.1)	3.40345	4.67134	0.00368353	0.0456448
k119_229339	Archaea	Membrane_Transport	ABC_transporter_oligopeptide_(TC_3.A.1.5.1)	Oligopeptide_transport_system_permease_protein_OppB_(TC_3.A.1.5.1)	4.66033	4.07183	0.00599247	0.0583319
k119_541119	Actinobacteria <phylum>	Membrane_Transport	Choline_Transport	Choline_sulfatase_(EC_3.1.6.6)	5.86295	5.67912	0.000331395	0.013453
k119_197931	Actinobacteria	Membrane_Transport	Choline_Transport	Choline_sulfatase_(EC_3.1.6.6)	2.97306	4.92909	0.00949417	0.0738409
k119_215464	Terrabacteria group	Membrane_Transport	Choline_Transport	Choline_sulfatase_(EC_3.1.6.6)	2.22129	4.84704	0.00966295	0.0744872
k119_265283	Rubrobacter xylanophilus	Membrane_Transport	Choline_Transport	Choline_sulfatase_(EC_3.1.6.6)	2.41707	4.72493	0.015096	0.0944047
k119_99824	Bacteria	Membrane_Transport	Choline_Transport	Choline_sulfatase_(EC_3.1.6.6)	6.10017	4.53737	0.000106603	0.00695464
k119_442271	Rubrobacter xylanophilus	Membrane_Transport	Choline_Transport	Choline_sulfatase_(EC_3.1.6.6)	3.31778	4.52669	0.00388093	0.0467691
k119_462250	Terrabacteria group	Membrane_Transport	Choline_Transport	Choline_sulfatase_(EC_3.1.6.6)	2.69302	4.44504	0.0110991	0.0799293
k119_151356	Bacteria	Membrane_Transport	Choline_Transport	Choline_sulfatase_(EC_3.1.6.6)	2.18138	4.27276	0.0145156	0.0924321
k119_230131	Bacteria	Membrane_Transport	Choline_Transport	Choline_sulfatase_(EC_3.1.6.6)	2.18683	4.23434	0.0165423	0.0993238
k119_361248	Rubrobacter	Membrane_Transport	ECF_class_transporters	Duplicated_ATPase_component_TTE1589_of_energizing_module_of_predicted_methylthioadenosine_ECF_transporter	2.78241	4.60603	0.00469866	0.0515555
k119_495546	Rubrobacter	Membrane_Transport	ECF_class_transporters	Duplicated_ATPase_component_TTE1589_of_energizing_module_of_predicted_methylthioadenosine_ECF_transporter	4.37209	4.20223	0.00847758	0.0697065
k119_224058	Rubrobacter	Membrane_Transport	ECF_class_transporters	Substrate_specific_component_TTE1586_of_predicted_methylthioadenosine_ECF_transporter	4.31186	4.40893	0.0160801	0.0977401
k119_374720	Rubrobacter	Membrane_Transport	ECF_class_transporters	Transmembrane_component_TTE1588_of_energizing_module_of_predicted_methylthioadenosine_ECF_transporter	3.78623	5.73219	0.000556911	0.0176392
k119_398434	Rubrobacter	Membrane_Transport	ECF_class_transporters	Transmembrane_component_TTE1588_of_energizing_module_of_predicted_methylthioadenosine_ECF_transporter	4.31146	4.56738	0.00411694	0.0483501
k119_28548	Rubrobacter xylanophilus	Membrane_Transport	Sodium_Hydrogen_Antiporter	Na(+)_H(+)_antiporter_subunit_E	2.2274	4.86627	0.0107321	0.0784538
k119_220660	Rubrobacter xylanophilus	Membrane_Transport	Sodium_Hydrogen_Antiporter	Na(+)_H(+)_antiporter_subunit_F	3.5003	4.92778	0.0165205	0.0992334
k119_28548	Rubrobacter xylanophilus	Membrane_Transport	Sodium_Hydrogen_Antiporter	Na(+)_H(+)_antiporter_subunit_F	2.2274	4.86627	0.0107321	0.0784538
k119_220660	Rubrobacter xylanophilus	Membrane_Transport	Sodium_Hydrogen_Antiporter	Na(+)_H(+)_antiporter_subunit_G	3.5003	4.92778	0.0165205	0.0992334
k119_28548	Rubrobacter xylanophilus	Membrane_Transport	Sodium_Hydrogen_Antiporter	Na(+)_H(+)_antiporter_subunit_G	2.2274	4.86627	0.0107321	0.0784538
k119_243941	Hymenobacter	Membrane_Transport	T6SS_BR	ClpB_protein	2.98248	5.69213	0.000139015	0.00817694
k119_501733	Rubrobacter	Membrane_Transport	T6SS_BR	ClpB_protein	3.65958	3.85792	0.00428563	0.0492478
k119_115854	Rubrobacter	Membrane_Transport	Ton_and_Tol_transport_systems	4_hydroxybenzoyl_CoA_thioesterase_family_active_site	2.87154	4.682	0.00277317	0.0395829
k119_65588	Rubrobacter	Membrane_Transport	Ton_and_Tol_transport_systems	4_hydroxybenzoyl_CoA_thioesterase_family_active_site	5.64964	4.1528	0.00328728	0.0432071
k119_337627	Sphingomonas	Membrane_Transport	Ton_and_Tol_transport_systems	Biopolymer_transport_protein_ExbD/TolR	7.16691	4.01311	0.00297946	0.0410546
k119_290156	Rubrobacter xylanophilus	Membrane_Transport	Ton_and_Tol_transport_systems	TPR_domain_protein_putative_component_of_TonB_system	2.34501	5.1843	0.00202008	0.0341661
k119_344761	Rubrobacter	Membrane_Transport	Ton_and_Tol_transport_systems	TPR_domain_protein_putative_component_of_TonB_system	2.43247	5.0254	0.00232782	0.0366685
k119_115854	Rubrobacter	Membrane_Transport	Ton_and_Tol_transport_systems	TPR_domain_protein_putative_component_of_TonB_system	2.87154	4.682	0.00277317	0.0395829
k119_401783	Actinobacteria	Membrane_Transport	Transport_of_Nickel_and_Cobalt	HoxN/HupN/NixA_family_nickel/cobalt_transporter	2.2746	4.44836	0.0112779	0.0807105
k119_499365	Rubrobacter radiotolerans	Membrane_Transport	Twin_arginine_translocation_system	Twin_arginine_translocation_protein_TatB	2.34976	4.55601	0.0082249	0.0687679
k119_222558	Actinobacteria <phylum>	Membrane_Transport	Twin_arginine_translocation_system	Twin_arginine_translocation_protein_TatB	2.46399	4.18812	0.0154105	0.095492
k119_203469	Actinobacteria <phylum>	Membrane_Transport	Twin_arginine_translocation_system	Twin_arginine_translocation_protein_TatB	3.90909	3.65368	0.00411326	0.0483374
k119_531944	Rubrobacter xylanophilus	Membrane_Transport	Twin_arginine_translocation_system	Twin_arginine_translocation_protein_TatC	3.79641	4.17358	0.00469436	0.0515354
k119_395238	Rubrobacter xylanophilus	Membrane_Transport	Twin_arginine_translocation_system	Twin_arginine_translocation_protein_TatC	3.58656	3.4377	0.0101344	0.0763653
k119_239270	Rubrobacter	Membrane_Transport	Type_IV_pilus	Twitching_motility_protein_PilT	4.2565	3.72536	0.00686289	0.0626061
k119_575970	Acidobacteria	Membrane_Transport	Type_IV_pilus	Type_IV_fimbrial_assembly_ATPase_PilB	2.82734	4.86262	0.00622591	0.059462
k119_307927	Bacteria	Membrane_Transport	Type_IV_pilus	Type_IV_fimbrial_assembly_ATPase_PilB	4.21553	4.55004	0.00160976	0.0303681
k119_140666	Micrococcales	Membrane_Transport	Type_IV_pilus	Type_IV_pilin_PilA	7.14555	4.04263	0.0138244	0.0901086
k119_548009	Terrabacteria group	Membrane_Transport	Widespread_colonization_island	Type_II/IV_secretion_system_ATPase_TadZ/CpaE_associated_with_Flp_pilus_assembly	6.70781	4.56206	0.01211	0.0838117
k119_346056	Rubrobacter xylanophilus	Metabolism_of_Aromatic_Compounds	Anaerobic_Aromatic_Degredation_(benzoate)	transcriptional_regulator_Crp/Fnr_family	2.83722	5.34837	0.000218766	0.0107408
k119_289103	Rubrobacter	Metabolism_of_Aromatic_Compounds	Anaerobic_Aromatic_Degredation_(benzoate)	transcriptional_regulator_Crp/Fnr_family	7.22662	5.32858	0.000227739	0.0109775
k119_281135	Rubrobacter xylanophilus	Metabolism_of_Aromatic_Compounds	Anaerobic_Aromatic_Degredation_(benzoate)	transcriptional_regulator_Crp/Fnr_family	2.5431	5.19474	0.00196371	0.0335894
k119_483872	Rubrobacter	Metabolism_of_Aromatic_Compounds	Anaerobic_Aromatic_Degredation_(benzoate)	transcriptional_regulator_Crp/Fnr_family	2.41659	4.78726	0.0107586	0.0785322
k119_557087	Rubrobacter	Metabolism_of_Aromatic_Compounds	Anaerobic_Aromatic_Degredation_(benzoate)	transcriptional_regulator_Crp/Fnr_family	2.11492	4.64688	0.0120682	0.0836395
k119_529531	Rubrobacter	Metabolism_of_Aromatic_Compounds	Anaerobic_Aromatic_Degredation_(benzoate)	transcriptional_regulator_Crp/Fnr_family	2.47785	4.31857	0.00616095	0.0591766
k119_545322	Rubrobacter	Metabolism_of_Aromatic_Compounds	Anaerobic_Aromatic_Degredation_(benzoate)	transcriptional_regulator_Crp/Fnr_family	3.49816	3.69769	0.0105719	0.0778286
k119_358469	Rubrobacter radiotolerans	Metabolism_of_Aromatic_Compounds	Aromatic_Amin_Catabolism	Nitrilotriacetate_monooxygenase_component_B_(EC_1.14.13._)	2.30809	4.886	0.00747044	0.0654518
k119_270946	Rubrobacter xylanophilus DSM 9941	Metabolism_of_Aromatic_Compounds	Benzoate_catabolism	Muconate_cycloisomerase_(EC_5.5.1.1)	2.92443	4.77279	0.00797373	0.0677165
k119_45961	Actinobacteria <phylum>	Metabolism_of_Aromatic_Compounds	Benzoate_transport_and_degradation_cluster	2_keto_4_pentenoate_hydratase/2_oxohepta_3_ene_17_dioic_acid_hydratase_(catechol_pathway)	2.61454	4.88387	0.00923147	0.072786
k119_58075	Bacteria	Metabolism_of_Aromatic_Compounds	Biphenyl_Degradation	Biphenyl_23_diol_12_dioxygenase_(EC_1.13.11.39)	4.04301	4.92608	0.00607513	0.0587629
k119_31661	Rubrobacter xylanophilus	Metabolism_of_Aromatic_Compounds	Biphenyl_Degradation	Biphenyl_23_diol_12_dioxygenase_(EC_1.13.11.39)	2.55216	4.43586	0.00609719	0.0588822
k119_211967	Actinobacteria	Metabolism_of_Aromatic_Compounds	Biphenyl_Degradation	Biphenyl_23_diol_12_dioxygenase_(EC_1.13.11.39)	15.9595	3.81854	0.0100305	0.075934
k119_492626	Actinobacteria <phylum>	Metabolism_of_Aromatic_Compounds	Catechol_branch_of_beta_ketoadipate_pathway	3_oxoadipate_CoA_transferase_subunit_A_(EC_2.8.3.6)	3.92093	4.42066	0.00412752	0.0483895
k119_579168	Rubrobacter	Metabolism_of_Aromatic_Compounds	Catechol_branch_of_beta_ketoadipate_pathway	3_oxoadipate_CoA_transferase_subunit_B_(EC_2.8.3.6)	2.39394	4.40219	0.0118133	0.0827349
k119_487729	Actinobacteria	Metabolism_of_Aromatic_Compounds	Catechol_branch_of_beta_ketoadipate_pathway	Beta_ketoadipate_enol_lactone_hydrolase_(EC_3.1.1.24)	3.64901	5.85789	0.000107195	0.00697274
k119_236187	Rubrobacter	Metabolism_of_Aromatic_Compounds	Catechol_branch_of_beta_ketoadipate_pathway	Catechol_12_dioxygenase_1_(EC_1.13.11.1)	2.31382	4.73312	0.00395896	0.0473448
k119_203429	Terrabacteria group	Metabolism_of_Aromatic_Compounds	Gentisate_degradation	2_polyprenyl_6_methoxyphenol_hydroxylase_and_related_FAD_dependent_oxidoreductases	3.72889	5.00442	0.00105242	0.0246569
k119_161600	Actinobacteria	Metabolism_of_Aromatic_Compounds	Gentisate_degradation	2_polyprenyl_6_methoxyphenol_hydroxylase_and_related_FAD_dependent_oxidoreductases	4.6625	4.47084	0.000970136	0.0238022
k119_206123	Rubrobacter	Metabolism_of_Aromatic_Compounds	Gentisate_degradation	2_polyprenyl_6_methoxyphenol_hydroxylase_and_related_FAD_dependent_oxidoreductases	3.48305	3.37703	0.0124783	0.0851639
k119_454746	Proteobacteria	Metabolism_of_Aromatic_Compounds	Gentisate_degradation	putative_4_hydroxybenzoyl_CoA_thioesterase	3.09336	4.94477	0.0140591	0.0909472
k119_247113	Bacteria	Metabolism_of_Aromatic_Compounds	Homogentisate_pathway_of_aromatic_compound_degradation	Transcriptional_regulator_IclR_family	3.74041	5.69121	0.000605868	0.0185845
k119_2820	Rubrobacter	Metabolism_of_Aromatic_Compounds	Homogentisate_pathway_of_aromatic_compound_degradation	Transcriptional_regulator_IclR_family	3.71541	5.55854	0.000472943	0.0163078
k119_27645	Terrabacteria group	Metabolism_of_Aromatic_Compounds	Homogentisate_pathway_of_aromatic_compound_degradation	Transcriptional_regulator_IclR_family	3.61496	5.52053	0.00115967	0.025911
k119_97551	Rubrobacter	Metabolism_of_Aromatic_Compounds	Homogentisate_pathway_of_aromatic_compound_degradation	Transcriptional_regulator_IclR_family	4.70363	5.25482	0.00147724	0.0292068
k119_54347	Terrabacteria group	Metabolism_of_Aromatic_Compounds	Homogentisate_pathway_of_aromatic_compound_degradation	Transcriptional_regulator_IclR_family	3.0027	5.09107	0.00101865	0.0243128
k119_71793	Terrabacteria group	Metabolism_of_Aromatic_Compounds	Homogentisate_pathway_of_aromatic_compound_degradation	Transcriptional_regulator_IclR_family	3.85426	4.66599	0.00112082	0.0254302
k119_552505	Actinobacteria	Metabolism_of_Aromatic_Compounds	Homogentisate_pathway_of_aromatic_compound_degradation	Transcriptional_regulator_IclR_family	2.74201	4.46543	0.00963216	0.0743817
k119_52153	Rubrobacter	Metabolism_of_Aromatic_Compounds	Homogentisate_pathway_of_aromatic_compound_degradation	Transcriptional_regulator_IclR_family	3.93911	3.8876	0.00580572	0.0573941
k119_375482	Streptosporangiales	Metabolism_of_Aromatic_Compounds	Homogentisate_pathway_of_aromatic_compound_degradation	Transcriptional_regulator_IclR_family	3.94053	3.78755	0.00295832	0.0408908
k119_322156	Bacteria	Metabolism_of_Aromatic_Compounds	N_heterocyclic_aromatic_compound_degradation	1H_3_hydroxy_4_oxoquinaldine_24_dioxygenase	2.65211	5.00352	0.0086201	0.0704695
k119_494211	unclassified Thaumarchaeota (miscellaneous)	Metabolism_of_Aromatic_Compounds	Protocatechuate_branch_of_beta_ketoadipate_pathway	4_carboxymuconolactone_decarboxylase_(EC_4.1.1.44)	5.61753	4.67865	0.00173743	0.0315444
k119_200170	Rubrobacter	Metabolism_of_Aromatic_Compounds	Protocatechuate_branch_of_beta_ketoadipate_pathway	Protocatechuate_34_dioxygenase_beta_chain_(EC_1.13.11.3)	3.10397	4.63559	0.012324	0.0845247
k119_47373	Bacteria	Metabolism_of_Aromatic_Compounds	Protocatechuate_branch_of_beta_ketoadipate_pathway	Protocatechuate_34_dioxygenase_beta_chain_(EC_1.13.11.3)	4.03958	4.5583	0.0031065	0.042004
k119_528773	Rubrobacter radiotolerans	Metabolism_of_Aromatic_Compounds	Salicylate_and_gentisate_catabolism	salicylate_esterase	3.22122	4.06413	0.00298013	0.0410546
k119_531453	Rubrobacter	Metabolite_damage_and_its_repair_or_mitigation	RidA_family_in_981_representative_prokaryotes	Orotidine_5'_phosphate_decarboxylase_(EC_4.1.1.23)	6.24677	5.28713	0.000157771	0.00883207
k119_105620	Rubrobacter	Metabolite_damage_and_its_repair_or_mitigation	RidA_family_in_981_representative_prokaryotes	Orotidine_5'_phosphate_decarboxylase_(EC_4.1.1.23)	9.74626	4.37424	0.000628083	0.018959
k119_211114	Rubrobacter	Metabolite_damage_and_its_repair_or_mitigation	RidA1_subgroup	Arsenical_pump_driving_ATPase_(EC_3.6.3.16)	3.44605	4.48279	0.0059053	0.0578275
k119_192947	Actinobacteria <phylum>	Metabolite_damage_and_its_repair_or_mitigation	RidA1_subgroup	Arsenical_pump_driving_ATPase_(EC_3.6.3.16)	2.96523	3.95525	0.0143804	0.0920376
k119_180243	Nitrososphaera	Metabolite_damage_and_its_repair_or_mitigation	RidA1_subgroup	Bis(5'_nucleosyl)_tetraphosphatase_(asymmetrical)_(EC_3.6.1.17)	2.46445	4.83458	0.00905658	0.0720813
k119_312875	Terrabacteria group	Metabolite_damage_and_its_repair_or_mitigation	RidA1_subgroup	Bis(5'_nucleosyl)_tetraphosphatase_(asymmetrical)_(EC_3.6.1.17)	2.88548	4.78732	0.0116317	0.0820223
k119_148796	Bacteria	Metabolite_damage_and_its_repair_or_mitigation	RidA1_subgroup	Bis(5'_nucleosyl)_tetraphosphatase_(asymmetrical)_(EC_3.6.1.17)	4.37568	4.53233	0.0023248	0.036645
k119_15499	Candidatus Nitrososphaera gargensis Ga9.2	Miscellaneous	Archease		3.74562	5.07132	0.0116824	0.0821835
k119_462081	Sphingomonadaceae	Miscellaneous	At1g69340_At2g40600	Beta_lactamase_class_C_and_other_penicillin_binding_proteins	2.37108	4.80214	0.0163483	0.0986477
k119_546845	Bacteria	Miscellaneous	At1g69340_At2g40600	Beta_lactamase_class_C_and_other_penicillin_binding_proteins	3.07564	4.7442	0.00334152	0.0435856
k119_474562	unclassified Chloroflexi (miscellaneous)	Miscellaneous	At1g69340_At2g40600	Beta_lactamase_class_C_and_other_penicillin_binding_proteins	3.02493	4.5548	0.0127734	0.0863174
k119_277782	Sphingomonadales	Miscellaneous	At1g69340_At2g40600	Uncharacterized_monothiol_glutaredoxin_ycf64_like	4.02784	4.47373	0.0163944	0.098797
k119_352296	Terrabacteria group	Miscellaneous	At2g33980_At1g28960	tRNA_nucleotidyltransferase_(EC_2.7.7.21)_(EC_2.7.7.25)	2.51721	5.36416	0.000508421	0.0167945
k119_535534	Rubrobacter	Miscellaneous	At2g33980_At1g28960	tRNA_nucleotidyltransferase_(EC_2.7.7.21)_(EC_2.7.7.25)	3.54578	4.67662	0.00639723	0.0603257
k119_207729	Rubrobacter	Miscellaneous	At5g04520_AT1G06240	Thiol_peroxidase_Bcp_type_(EC_1.11.1.15)	3.66356	5.3564	0.00139813	0.028355
k119_142126	Rubrobacter radiotolerans	Miscellaneous	At5g04520_AT1G06240	Thiol_peroxidase_Bcp_type_(EC_1.11.1.15)	2.57388	3.95688	0.0133652	0.088424
k119_264487	Rubrobacter	Miscellaneous	At5g04520_AT1G06240	Thiol_peroxidase_Bcp_type_(EC_1.11.1.15)	11.9807	2.93492	0.00244057	0.0374078
k119_305261	Actinobacteria	Miscellaneous	Broadly_distributed_proteins_not_in_subsystems	UPF0234_protein_YajQ	4.06724	4.36292	0.00132726	0.0275264
k119_565791	Rubrobacter aplysinae	Miscellaneous	Broadly_distributed_proteins_not_in_subsystems	YbbM_seven_transmembrane_helix_protein	4.20616	6.02001	3.49141e-05	0.00336807
k119_564838	Pseudonocardiaceae	Miscellaneous	COG2016	Thioredoxin	9.58039	5.13817	0.00106492	0.0247613
k119_191234	Candidatus Nitrososphaera gargensis Ga9.2	Miscellaneous	COG2016	Thioredoxin	2.27264	4.40542	0.00718696	0.0641477
k119_449233	Rubrobacter	Miscellaneous	Conserved_gene_cluster_possibly_involved_in_RNA_metabolism	Cysteinyl_tRNA_synthetase_(EC_6.1.1.16)	2.15318	4.92827	0.00412656	0.0483883
k119_170821	Nitrososphaera	Miscellaneous	Conserved_gene_cluster_possibly_involved_in_RNA_metabolism	Cysteinyl_tRNA_synthetase_(EC_6.1.1.16)	2.66445	4.74004	0.0127498	0.08626
k119_259854	Rubrobacter	Miscellaneous	Conserved_gene_cluster_possibly_involved_in_RNA_metabolism	Cysteinyl_tRNA_synthetase_(EC_6.1.1.16)	3.26124	4.3163	0.0120556	0.0836055
k119_346882	Rubrobacter	Miscellaneous	Conserved_gene_cluster_possibly_involved_in_RNA_metabolism	Cysteinyl_tRNA_synthetase_(EC_6.1.1.16)	6.73972	3.64419	0.00100233	0.0241489
k119_467942	Rubrobacter	Miscellaneous	EC_6.3.4.__Ligases_that_form_carbon_nitrogen_bonds	CTP_synthase_(EC_6.3.4.2)	4.45209	5.77477	0.000143478	0.00834818
k119_65433	Rubrobacter	Miscellaneous	EC_6.3.4.__Ligases_that_form_carbon_nitrogen_bonds	CTP_synthase_(EC_6.3.4.2)	4.97365	5.3724	0.00040399	0.0149021
k119_41133	Rubrobacter	Miscellaneous	EC_6.3.4.__Ligases_that_form_carbon_nitrogen_bonds	CTP_synthase_(EC_6.3.4.2)	6.11324	5.19718	0.000355652	0.0139567
k119_206532	Nitrososphaera	Miscellaneous	EC_6.3.4.__Ligases_that_form_carbon_nitrogen_bonds	CTP_synthase_(EC_6.3.4.2)	5.48215	4.96877	0.000504578	0.0167274
k119_467000	Rubrobacter	Miscellaneous	EC_6.3.4.__Ligases_that_form_carbon_nitrogen_bonds	CTP_synthase_(EC_6.3.4.2)	4.40435	4.92533	0.00142945	0.0287422
k119_116016	Rubrobacter	Miscellaneous	EC_6.3.4.__Ligases_that_form_carbon_nitrogen_bonds	CTP_synthase_(EC_6.3.4.2)	4.89741	4.82495	0.000746579	0.0208573
k119_330469	Thaumarchaeota	Miscellaneous	EC_6.3.4.__Ligases_that_form_carbon_nitrogen_bonds	CTP_synthase_(EC_6.3.4.2)	2.50422	4.79382	0.0118277	0.0827838
k119_175427	Rubrobacter	Miscellaneous	EC_6.3.4.__Ligases_that_form_carbon_nitrogen_bonds	CTP_synthase_(EC_6.3.4.2)	2.68275	4.18024	0.0120215	0.0835275
k119_224673	Rubrobacter	Miscellaneous	EC_6.3.4.__Ligases_that_form_carbon_nitrogen_bonds	CTP_synthase_(EC_6.3.4.2)	2.3696	4.04425	0.0163815	0.0987727
k119_195119	Rubrobacter	Miscellaneous	EC_6.3.4.__Ligases_that_form_carbon_nitrogen_bonds	CTP_synthase_(EC_6.3.4.2)	3.12903	3.69979	0.0163245	0.0985784
k119_548034	Rubrobacter	Miscellaneous	EC_6.3.4.__Ligases_that_form_carbon_nitrogen_bonds	CTP_synthase_(EC_6.3.4.2)	3.3099	3.37562	0.0158822	0.0971199
k119_491163	Thaumarchaeota	Miscellaneous	EC_6.3.4.__Ligases_that_form_carbon_nitrogen_bonds	Phosphoribosylamine__glycine_ligase_(EC_6.3.4.13)	3.41625	5.23466	0.00382704	0.0465276
k119_718	Rubrobacter	Miscellaneous	IojapClusters	Adenylate_cyclase_(EC_4.6.1.1)	4.9259	5.36713	0.00076283	0.0210466
k119_543458	Rubrobacter	Miscellaneous	IojapClusters	Adenylate_cyclase_(EC_4.6.1.1)	2.66188	4.73723	0.00811133	0.0683052
k119_196545	Rubrobacter aplysinae	Miscellaneous	IojapClusters	Adenylate_cyclase_(EC_4.6.1.1)	2.79368	4.73183	0.00453122	0.0506592
k119_99746	cellular organisms	Miscellaneous	IojapClusters	Adenylate_cyclase_(EC_4.6.1.1)	10.7174	4.51051	0.000650415	0.0192478
k119_144052	Rubrobacter aplysinae	Miscellaneous	IojapClusters	Adenylate_cyclase_(EC_4.6.1.1)	4.71676	4.42185	0.0012	0.0262578
k119_461857	Rubrobacter	Miscellaneous	IojapClusters	Adenylate_cyclase_(EC_4.6.1.1)	2.62205	4.359	0.0140236	0.0908277
k119_301877	Cyanobacteria	Miscellaneous	IojapClusters	Adenylate_cyclase_(EC_4.6.1.1)	2.75878	4.22245	0.0136431	0.0894503
k119_20295	cellular organisms	Miscellaneous	IojapClusters	Adenylate_cyclase_(EC_4.6.1.1)	4.36458	3.97195	0.0112026	0.0804087
k119_201599	Actinobacteria	Miscellaneous	IojapClusters	Adenylate_cyclase_(EC_4.6.1.1)	3.79943	3.84665	0.0111355	0.0800671
k119_361875	Rubrobacter	Miscellaneous	IojapClusters	Adenylate_cyclase_(EC_4.6.1.1)	16.5883	3.84517	9.82909e-05	0.00661485
k119_585853	Rubrobacter	Miscellaneous	IojapClusters	Adenylate_cyclase_(EC_4.6.1.1)	4.31573	3.81796	0.00434336	0.0495367
k119_488570	Rubrobacter	Miscellaneous	IojapClusters	Adenylate_cyclase_(EC_4.6.1.1)	9.13986	3.00834	0.0140863	0.0910426
k119_155244	cellular organisms	Miscellaneous	IojapClusters	Inorganic_pyrophosphatase_(EC_3.6.1.1)	3.85406	4.56475	0.0116727	0.0821316
k119_307044	cellular organisms	Miscellaneous	IojapClusters	Inorganic_pyrophosphatase_(EC_3.6.1.1)	4.68142	4.15409	0.00199216	0.0338738
k119_529765	Rubrobacter	Miscellaneous	IojapClusters	LSU_ribosomal_protein_L21p	2.64959	4.47538	0.00748097	0.0655193
k119_193694	Actinobacteria	Miscellaneous	IojapClusters	LSU_ribosomal_protein_L21p	4.55849	4.34105	0.00428737	0.0492478
k119_304819	Rubrobacter aplysinae	Miscellaneous	IojapClusters	LSU_ribosomal_protein_L21p	3.90692	3.72421	0.016444	0.0989907
k119_529765	Rubrobacter	Miscellaneous	IojapClusters	LSU_ribosomal_protein_L27p	2.64959	4.47538	0.00748097	0.0655193
k119_304819	Rubrobacter aplysinae	Miscellaneous	IojapClusters	LSU_ribosomal_protein_L27p	3.90692	3.72421	0.016444	0.0989907
k119_202958	Rubrobacter xylanophilus	Miscellaneous	Metabolite_repair	5_nucleotidase_SurE_(EC_3.1.3.5)	3.02667	5.31494	0.00273035	0.0393441
k119_10047	Rubrobacter	Miscellaneous	Metabolite_repair	5_nucleotidase_SurE_(EC_3.1.3.5)	4.22733	5.1304	0.000169109	0.00918158
k119_462901	Rubrobacter	Miscellaneous	Metabolite_repair	5_nucleotidase_SurE_(EC_3.1.3.5)	5.15157	4.07284	0.00209253	0.0347785
k119_323327	Rubrobacter	Miscellaneous	Metabolite_repair	FIG002003:_Protein_YdjA	3.92106	3.80241	0.00355801	0.0449428
k119_49897	Thaumarchaeota	Miscellaneous	Metabolite_repair	Nucleotidase_YfbR_HD_superfamily	5.62421	5.40908	0.000434768	0.0155801
k119_188287	Nitrososphaera	Miscellaneous	YebC	GTP_binding_and_nucleic_acid_binding_protein_YchF	3.25059	4.88324	0.00158454	0.030135
k119_17828	Rubrobacter xylanophilus	Miscellaneous	YebC	Putative_Nudix_hydrolase_YfcD_(EC_3.6._._)	2.77133	4.80576	0.013225	0.0879137
k119_348673	Rubrobacter	Miscellaneous	YebC	Threonyl_tRNA_synthetase_(EC_6.1.1.3)	4.12902	5.0442	0.00130553	0.0273058
k119_184469	Rubrobacter	Miscellaneous	YebC	Threonyl_tRNA_synthetase_(EC_6.1.1.3)	2.82757	4.91971	0.0031601	0.0423874
k119_68214	Rubrobacter	Miscellaneous	YebC	Threonyl_tRNA_synthetase_(EC_6.1.1.3)	3.73799	4.91912	0.00171179	0.0312884
k119_288783	cellular organisms	Miscellaneous	YebC	Threonyl_tRNA_synthetase_(EC_6.1.1.3)	3.98709	4.90956	0.000920186	0.023202
k119_206310	Rubrobacter	Miscellaneous	YebC	Threonyl_tRNA_synthetase_(EC_6.1.1.3)	4.42448	4.60918	0.001205	0.0263201
k119_183844	Rubrobacter	Miscellaneous	YebC	Threonyl_tRNA_synthetase_(EC_6.1.1.3)	4.95276	4.17847	0.00458222	0.050938
k119_102683	Rubrobacter	Miscellaneous	YebC	Threonyl_tRNA_synthetase_(EC_6.1.1.3)	2.91959	4.00069	0.00593895	0.0580723
k119_304403	Rubrobacter	Miscellaneous	YebC	Threonyl_tRNA_synthetase_(EC_6.1.1.3)	9.63882	3.40318	0.0029383	0.0407263
k119_347879	Rubrobacter	Mitochondrial_electron_transport_system_in_plants	F0F1_type_ATP_synthase_in_plants_(mitochondrial)	ATP_synthase_alpha_chain_(EC_3.6.3.14)	3.72034	5.32656	0.00038542	0.0146052
k119_54430	Thermoleophilia	Mitochondrial_electron_transport_system_in_plants	F0F1_type_ATP_synthase_in_plants_(mitochondrial)	ATP_synthase_alpha_chain_(EC_3.6.3.14)	3.42713	4.61203	0.00472888	0.0517376
k119_90669	Rubrobacter	Mitochondrial_electron_transport_system_in_plants	F0F1_type_ATP_synthase_in_plants_(mitochondrial)	ATP_synthase_alpha_chain_(EC_3.6.3.14)	2.84342	4.38336	0.00884123	0.0713166
k119_328301	Actinobacteria	Mitochondrial_electron_transport_system_in_plants	F0F1_type_ATP_synthase_in_plants_(mitochondrial)	ATP_synthase_alpha_chain_(EC_3.6.3.14)	5.853	4.32371	0.00152379	0.0295767
k119_387239	Rubrobacter radiotolerans	Mitochondrial_electron_transport_system_in_plants	F0F1_type_ATP_synthase_in_plants_(mitochondrial)	ATP_synthase_alpha_chain_(EC_3.6.3.14)	2.52412	4.13944	0.0105825	0.0778604
k119_303584	Rubrobacter	Mitochondrial_electron_transport_system_in_plants	F0F1_type_ATP_synthase_in_plants_(mitochondrial)	ATP_synthase_alpha_chain_(EC_3.6.3.14)	4.59031	3.94696	0.00286884	0.0402574
k119_146677	Rubrobacter	Mitochondrial_electron_transport_system_in_plants	F0F1_type_ATP_synthase_in_plants_(mitochondrial)	ATP_synthase_alpha_chain_(EC_3.6.3.14)	4.93329	3.40201	0.00518445	0.0542558
k119_62568	Rubrobacter	Mitochondrial_electron_transport_system_in_plants	F0F1_type_ATP_synthase_in_plants_(mitochondrial)	ATP_synthase_alpha_chain_(EC_3.6.3.14)	6.98906	2.95375	0.0067309	0.062125
k119_45305	Bacteria	Mitochondrial_electron_transport_system_in_plants	F0F1_type_ATP_synthase_in_plants_(mitochondrial)	ATP_synthase_beta_chain_(EC_3.6.3.14)	4.97883	5.61997	0.000138257	0.00815351
k119_234120	Rubrobacter	Mitochondrial_electron_transport_system_in_plants	F0F1_type_ATP_synthase_in_plants_(mitochondrial)	ATP_synthase_beta_chain_(EC_3.6.3.14)	2.52657	4.73418	0.00384628	0.0466618
k119_203624	Rubrobacter aplysinae	Mitochondrial_electron_transport_system_in_plants	F0F1_type_ATP_synthase_in_plants_(mitochondrial)	ATP_synthase_beta_chain_(EC_3.6.3.14)	2.47237	4.59379	0.00343327	0.0441248
k119_267572	Terrabacteria group	Mitochondrial_electron_transport_system_in_plants	F0F1_type_ATP_synthase_in_plants_(mitochondrial)	ATP_synthase_beta_chain_(EC_3.6.3.14)	6.6926	3.47346	0.00819989	0.0686598
k119_138008	Bacteria	Mitochondrial_electron_transport_system_in_plants	F0F1_type_ATP_synthase_in_plants_(mitochondrial)	ATP_synthase_beta_chain_(EC_3.6.3.14)	5.80148	3.10179	0.0107866	0.0786232
k119_442910	Rubrobacter	Mitochondrial_electron_transport_system_in_plants	F0F1_type_ATP_synthase_in_plants_(mitochondrial)	ATP_synthase_beta_chain_(EC_3.6.3.14)	5.47222	3.0342	0.00741522	0.0652465
k119_183560	Terrabacteria group	Mitochondrial_electron_transport_system_in_plants	F0F1_type_ATP_synthase_in_plants_(mitochondrial)	ATP_synthase_delta_chain_(EC_3.6.3.14)	2.75161	4.31463	0.0102029	0.076616
k119_475137	Rubrobacter	Mitochondrial_electron_transport_system_in_plants	F0F1_type_ATP_synthase_in_plants_(mitochondrial)	ATP_synthase_delta_chain_(EC_3.6.3.14)	4.36109	4.30769	0.00311014	0.0420455
k119_303584	Rubrobacter	Mitochondrial_electron_transport_system_in_plants	F0F1_type_ATP_synthase_in_plants_(mitochondrial)	ATP_synthase_delta_chain_(EC_3.6.3.14)	4.59031	3.94696	0.00286884	0.0402574
k119_557515	Rubrobacter xylanophilus	Mitochondrial_electron_transport_system_in_plants	F0F1_type_ATP_synthase_in_plants_(mitochondrial)	ATP_synthase_delta_chain_(EC_3.6.3.14)	9.64436	2.94233	0.00422379	0.0489122
k119_343205	Bacteria	Mitochondrial_electron_transport_system_in_plants	F0F1_type_ATP_synthase_in_plants_(mitochondrial)	ATP_synthase_F0_sector_subunit_a	3.90636	4.8388	0.00808385	0.0681876
k119_27204	Rubrobacter xylanophilus	Mitochondrial_electron_transport_system_in_plants	F0F1_type_ATP_synthase_in_plants_(mitochondrial)	ATP_synthase_F0_sector_subunit_a	2.53031	4.78531	0.00774537	0.0667696
k119_426407	Rubrobacter	Mitochondrial_electron_transport_system_in_plants	F0F1_type_ATP_synthase_in_plants_(mitochondrial)	ATP_synthase_F0_sector_subunit_a	5.81519	4.37722	0.000313415	0.0131067
k119_404533	Rubrobacter xylanophilus	Mitochondrial_electron_transport_system_in_plants	F0F1_type_ATP_synthase_in_plants_(mitochondrial)	ATP_synthase_F0_sector_subunit_a	3.24129	4.34491	0.00431006	0.049348
k119_527345	Solirubrobacterales	Mitochondrial_electron_transport_system_in_plants	F0F1_type_ATP_synthase_in_plants_(mitochondrial)	ATP_synthase_F0_sector_subunit_a	4.47635	3.99239	0.0110285	0.079592
k119_239459	Rubrobacter	Mitochondrial_electron_transport_system_in_plants	F0F1_type_ATP_synthase_in_plants_(mitochondrial)	ATP_synthase_F0_sector_subunit_a	11.9698	3.16424	0.00116731	0.0259429
k119_404533	Rubrobacter xylanophilus	Mitochondrial_electron_transport_system_in_plants	F0F1_type_ATP_synthase_in_plants_(mitochondrial)	ATP_synthase_F0_sector_subunit_b	3.24129	4.34491	0.00431006	0.049348
k119_221782	Rubrobacter xylanophilus	Mitochondrial_electron_transport_system_in_plants	F0F1_type_ATP_synthase_in_plants_(mitochondrial)	ATP_synthase_F0_sector_subunit_b	5.51551	3.48053	0.00607558	0.0587629
k119_239459	Rubrobacter	Mitochondrial_electron_transport_system_in_plants	F0F1_type_ATP_synthase_in_plants_(mitochondrial)	ATP_synthase_F0_sector_subunit_b	11.9698	3.16424	0.00116731	0.0259429
k119_221782	Rubrobacter xylanophilus	Mitochondrial_electron_transport_system_in_plants	F0F1_type_ATP_synthase_in_plants_(mitochondrial)	ATP_synthase_F0_sector_subunit_c	5.51551	3.48053	0.00607558	0.0587629
k119_306403	Solirubrobacterales	Mitochondrial_electron_transport_system_in_plants	F0F1_type_ATP_synthase_in_plants_(mitochondrial)	ATP_synthase_gamma_chain_(EC_3.6.3.14)	5.27507	4.53605	0.00148212	0.0292442
k119_90669	Rubrobacter	Mitochondrial_electron_transport_system_in_plants	F0F1_type_ATP_synthase_in_plants_(mitochondrial)	ATP_synthase_gamma_chain_(EC_3.6.3.14)	2.84342	4.38336	0.00884123	0.0713166
k119_186657	Solirubrobacterales	Mitochondrial_electron_transport_system_in_plants	F0F1_type_ATP_synthase_in_plants_(mitochondrial)	ATP_synthase_gamma_chain_(EC_3.6.3.14)	9.13499	4.21115	0.00578796	0.0573229
k119_387239	Rubrobacter radiotolerans	Mitochondrial_electron_transport_system_in_plants	F0F1_type_ATP_synthase_in_plants_(mitochondrial)	ATP_synthase_gamma_chain_(EC_3.6.3.14)	2.52412	4.13944	0.0105825	0.0778604
k119_449773	Terrabacteria group	Mitochondrial_electron_transport_system_in_plants	F0F1_type_ATP_synthase_in_plants_(mitochondrial)	ATP_synthase_gamma_chain_(EC_3.6.3.14)	4.67085	4.10088	0.0105646	0.0778286
k119_320641	Actinobacteria <phylum>	Mitochondrial_electron_transport_system_in_plants	F0F1_type_ATP_synthase_in_plants_(mitochondrial)	ATP_synthase_gamma_chain_(EC_3.6.3.14)	6.46272	3.99884	0.0115926	0.0818792
k119_556554	Rubrobacter	Mitochondrial_electron_transport_system_in_plants	F0F1_type_ATP_synthase_in_plants_(mitochondrial)	ATP_synthase_gamma_chain_(EC_3.6.3.14)	9.19545	3.40481	0.000929139	0.0232975
k119_440703	Sphingomonadales	Mitochondrial_electron_transport_system_in_plants	Respiratory_complex_III_(cytochrome_b_c1)_in_plants	Ubiquinol__cytochrome_c_reductase_cytochrome_B_subunit_(EC_1.10.2.2)	4.49714	5.68437	0.00255961	0.0382281
k119_292568	Sphingomonadales	Mitochondrial_electron_transport_system_in_plants	Respiratory_complex_III_(cytochrome_b_c1)_in_plants	Ubiquinol__cytochrome_c_reductase_cytochrome_B_subunit_(EC_1.10.2.2)	2.63289	4.64141	0.00512503	0.0538934
k119_289462	Propionibacteriales	Mitochondrial_electron_transport_system_in_plants	Respiratory_complex_III_(cytochrome_b_c1)_in_plants	Ubiquinol__cytochrome_c_reductase_cytochrome_B_subunit_(EC_1.10.2.2)	2.60503	4.45398	0.00992193	0.0754446
k119_581642	Nocardioidaceae	Mitochondrial_electron_transport_system_in_plants	Respiratory_complex_III_(cytochrome_b_c1)_in_plants	ubiquinol_cytochrome_C_oxidoreductase_cytochrome_C1_subunit	7.40807	6.46621	0.000100428	0.00671584
k119_45451	Nocardioidaceae	Mitochondrial_electron_transport_system_in_plants	Respiratory_complex_IV_(terminal_cytochrome_c_oxidase)_in_plants	Cytochrome_c_oxidase_polypeptide_I_(EC_1.9.3.1)	4.01057	5.9039	0.000132703	0.00799184
k119_301153	Thermoleophilia	Mitochondrial_electron_transport_system_in_plants	Respiratory_complex_IV_(terminal_cytochrome_c_oxidase)_in_plants	Cytochrome_c_oxidase_polypeptide_I_(EC_1.9.3.1)	6.75454	5.57425	6.27268e-05	0.00494679
k119_72989	Nitrososphaera	Mitochondrial_electron_transport_system_in_plants	Respiratory_complex_IV_(terminal_cytochrome_c_oxidase)_in_plants	Cytochrome_c_oxidase_polypeptide_I_(EC_1.9.3.1)	3.54977	5.29636	0.000213681	0.010534
k119_177030	Nitrososphaera	Mitochondrial_electron_transport_system_in_plants	Respiratory_complex_IV_(terminal_cytochrome_c_oxidase)_in_plants	Cytochrome_c_oxidase_polypeptide_I_(EC_1.9.3.1)	6.01378	5.16777	0.000270012	0.0120309
k119_544331	Bacteria	Mitochondrial_electron_transport_system_in_plants	Respiratory_complex_IV_(terminal_cytochrome_c_oxidase)_in_plants	Cytochrome_c_oxidase_polypeptide_I_(EC_1.9.3.1)	5.32293	4.07362	0.00713833	0.0639478
k119_122169	Actinobacteria	Mitochondrial_electron_transport_system_in_plants	Respiratory_complex_IV_(terminal_cytochrome_c_oxidase)_in_plants	Cytochrome_c_oxidase_polypeptide_I_(EC_1.9.3.1)	4.85828	3.98979	0.00267525	0.0390053
k119_440282	Thaumarchaeota	Mitochondrial_electron_transport_system_in_plants	Respiratory_complex_IV_(terminal_cytochrome_c_oxidase)_in_plants	Cytochrome_c_oxidase_polypeptide_I_(EC_1.9.3.1)	4.23127	3.74736	0.0154787	0.0957302
k119_262576	Thermoleophilia	Mitochondrial_electron_transport_system_in_plants	Respiratory_complex_IV_(terminal_cytochrome_c_oxidase)_in_plants	Cytochrome_c_oxidase_polypeptide_I_(EC_1.9.3.1)	5.21286	3.65211	0.0126632	0.0858899
k119_416849	Thermoleophilia	Mitochondrial_electron_transport_system_in_plants	Respiratory_complex_IV_(terminal_cytochrome_c_oxidase)_in_plants	Cytochrome_c_oxidase_polypeptide_I_(EC_1.9.3.1)	6.32581	3.46362	0.0148909	0.0936852
k119_149683	Actinobacteria	Mitochondrial_electron_transport_system_in_plants	Respiratory_complex_IV_(terminal_cytochrome_c_oxidase)_in_plants	Cytochrome_c_oxidase_polypeptide_II_(EC_1.9.3.1)	2.27646	4.39649	0.012942	0.0868854
k119_127287	Bacteria	Motility_and_Chemotaxis	Bacterial_Chemotaxis	Ribose_ABC_transporter_periplasmic_ribose_binding_protein_RbsB_(TC_3.A.1.2.1)	2.42874	4.82058	0.0152149	0.0948439
k119_110767	Bacteria	Motility_and_Chemotaxis	Bacterial_Chemotaxis	Ribose_ABC_transporter_periplasmic_ribose_binding_protein_RbsB_(TC_3.A.1.2.1)	2.1432	4.79045	0.00802891	0.0679831
k119_296388	Actinobacteria <phylum>	Motility_and_Chemotaxis	Bacterial_Chemotaxis	Ribose_ABC_transporter_periplasmic_ribose_binding_protein_RbsB_(TC_3.A.1.2.1)	5.43224	4.51076	0.000736906	0.0206809
k119_460119	Rubrobacter xylanophilus	Motility_and_Chemotaxis	Bacterial_motility:Gliding	Cell_division_protein_FtsX	2.38086	4.77971	0.00567768	0.0567348
k119_283153	Rubrobacter xylanophilus	Motility_and_Chemotaxis	Bacterial_motility:Gliding	Cell_division_protein_FtsX	4.19645	4.00254	0.00315511	0.0423512
k119_557929	Rubrobacter	Motility_and_Chemotaxis	Bacterial_motility:Gliding	Cell_division_protein_FtsX	3.80875	3.49245	0.0143868	0.0920376
k119_437447	Bacteria	Motility_and_Chemotaxis	Bacterial_motility:Gliding	Type_II_secretory_pathway_ATPase_PulE/Tfp_pilus_assembly_pathway_ATPase_PilB	4.46662	5.35001	0.00703106	0.063391
k119_468570	Acidobacteria	Motility_and_Chemotaxis	Flagellar_motility	RNA_polymerase_sigma_54_factor_RpoN	3.41455	5.57168	0.00218551	0.0354889
k119_465017	Bacteria	Motility_and_Chemotaxis	Flagellar_motility	RNA_polymerase_sigma_54_factor_RpoN	4.22722	4.61773	0.00311944	0.0420889
k119_570293	Bacteria	Motility_and_Chemotaxis	Flagellum	Flagellar_hook_length_control_protein_FliK	2.2085	4.65345	0.015871	0.0970675
k119_2744	cellular organisms	Nitrogen_Metabolism	Ammonia_assimilation	Ammonium_transporter	4.64871	5.71035	0.000402867	0.0148874
k119_164239	Nitrososphaera	Nitrogen_Metabolism	Ammonia_assimilation	Ammonium_transporter	9.31404	4.54997	0.00103263	0.0244621
k119_453604	Bacteria	Nitrogen_Metabolism	Denitrification	Nitric_oxide_reductase_(EC_1.7.99.7)_quinol_dependent	3.99002	4.76188	0.0107245	0.0784538
k119_478991	Bacteria	Nitrogen_Metabolism	Denitrification	Nitrous_oxide_reductase_maturation_transmembrane_protein_NosY	2.39917	4.97243	0.00195051	0.0334965
k119_57013	Terrabacteria group	Nitrogen_Metabolism	Nitrate_and_nitrite_ammonification	Ferredoxin__nitrite_reductase_(EC_1.7.7.1)	4.79516	5.30361	0.00011305	0.0071583
k119_412526	Rubrobacter	Nitrogen_Metabolism	Nitrate_and_nitrite_ammonification	Ferredoxin__nitrite_reductase_(EC_1.7.7.1)	2.74042	4.23719	0.00698944	0.0632157
k119_585149	Bacteria	Nitrogen_Metabolism	Nitrate_and_nitrite_ammonification	Nitrate/nitrite_response_regulator_protein	3.82669	5.81425	0.000582846	0.0181878
k119_572302	Terrabacteria group	Nitrogen_Metabolism	Nitrate_and_nitrite_ammonification	Nitrate/nitrite_response_regulator_protein	2.75745	5.07698	0.00680585	0.0623913
k119_260317	Rubrobacter	Nitrogen_Metabolism	Nitrate_and_nitrite_ammonification	Nitrate/nitrite_response_regulator_protein	2.79485	4.91562	0.0125285	0.085357
k119_540368	Rubrobacter aplysinae	Nitrogen_Metabolism	Nitrate_and_nitrite_ammonification	Nitrate/nitrite_response_regulator_protein	2.87406	4.90615	0.00534217	0.0550334
k119_544741	Rubrobacter	Nitrogen_Metabolism	Nitrate_and_nitrite_ammonification	Nitrate/nitrite_response_regulator_protein	3.46746	4.6672	0.00307455	0.0417861
k119_307115	Rubrobacter aplysinae	Nitrogen_Metabolism	Nitrate_and_nitrite_ammonification	Nitrate/nitrite_response_regulator_protein	3.17289	4.42212	0.00547695	0.0556138
k119_540398	Terrabacteria group	Nitrogen_Metabolism	Nitrate_and_nitrite_ammonification	Nitrate/nitrite_response_regulator_protein	2.39251	4.34268	0.0120053	0.0834463
k119_315491	Rubrobacter radiotolerans	Nitrogen_Metabolism	Nitrate_and_nitrite_ammonification	Nitrate/nitrite_response_regulator_protein	3.27132	4.19333	0.00917413	0.072605
k119_120757	Rubrobacter	Nitrogen_Metabolism	Nitrate_and_nitrite_ammonification	Nitrate/nitrite_response_regulator_protein	3.23067	4.17647	0.0104062	0.0773523
k119_394713	Rubrobacter aplysinae	Nitrogen_Metabolism	Nitrate_and_nitrite_ammonification	Nitrate/nitrite_response_regulator_protein	3.62253	3.75746	0.00966124	0.0744842
k119_22003	Rubrobacter xylanophilus	Nitrogen_Metabolism	Nitrate_and_nitrite_ammonification	Nitrate/nitrite_response_regulator_protein	3.85375	3.20435	0.0139288	0.0904681
k119_269224	Rubrobacter	Nitrogen_Metabolism	Nitric_oxide_synthase	Manganese_superoxide_dismutase_(EC_1.15.1.1)	6.27579	5.57812	0.000108072	0.00698792
k119_317748	Bacteria	Nitrogen_Metabolism	Nitric_oxide_synthase	Manganese_superoxide_dismutase_(EC_1.15.1.1)	5.88806	4.3741	0.00463769	0.051233
k119_458080	Bacilli	Nitrogen_Metabolism	Nitric_oxide_synthase	Manganese_superoxide_dismutase_(EC_1.15.1.1)	4.42148	4.26591	0.00522992	0.054477
k119_434869	Terrabacteria group	Nitrogen_Metabolism	Nitric_oxide_synthase	Manganese_superoxide_dismutase_(EC_1.15.1.1)	3.13774	4.22207	0.0135751	0.0892669
k119_311774	Rubrobacter	Nitrogen_Metabolism	Nitric_oxide_synthase	Manganese_superoxide_dismutase_(EC_1.15.1.1)	4.84493	3.66104	0.00866952	0.0706765
k119_59531	Rubrobacter	Nitrogen_Metabolism	Nitric_oxide_synthase	Manganese_superoxide_dismutase_(EC_1.15.1.1)	4.66387	3.59724	0.00496515	0.0529692
k119_341196	Rubrobacter	Nitrogen_Metabolism	Nitric_oxide_synthase	Manganese_superoxide_dismutase_(EC_1.15.1.1)	6.09995	3.09506	0.0127353	0.0862013
k119_290076	Rubrobacter	Nitrogen_Metabolism	Nitric_oxide_synthase	Manganese_superoxide_dismutase_(EC_1.15.1.1)	8.97713	2.75432	0.0151016	0.0944106
k119_222388	Rubrobacter	Nucleosides_and_Nucleotides	De_Novo_Purine_Biosynthesis	Adenylosuccinate_lyase_(EC_4.3.2.2)	3.06216	5.20618	0.00252946	0.0380134
k119_247930	Rubrobacter	Nucleosides_and_Nucleotides	De_Novo_Purine_Biosynthesis	Adenylosuccinate_lyase_(EC_4.3.2.2)	2.14075	4.54333	0.0101038	0.0762054
k119_306662	Rubrobacter radiotolerans	Nucleosides_and_Nucleotides	De_Novo_Purine_Biosynthesis	Adenylosuccinate_lyase_(EC_4.3.2.2)	2.20589	4.35868	0.0109927	0.0794423
k119_439068	Rubrobacter	Nucleosides_and_Nucleotides	De_Novo_Purine_Biosynthesis	IMP_cyclohydrolase_(EC_3.5.4.10)	4.68975	3.8964	0.0137081	0.0896573
k119_222388	Rubrobacter	Nucleosides_and_Nucleotides	De_Novo_Purine_Biosynthesis	Phosphoribosylaminoimidazole_succinocarboxamide_synthase_(EC_6.3.2.6)	3.06216	5.20618	0.00252946	0.0380134
k119_249259	Rubrobacter	Nucleosides_and_Nucleotides	De_Novo_Purine_Biosynthesis	Phosphoribosylaminoimidazole_succinocarboxamide_synthase_(EC_6.3.2.6)	3.23524	4.79054	0.00354229	0.0448147
k119_125642	Rubrobacter	Nucleosides_and_Nucleotides	De_Novo_Purine_Biosynthesis	Phosphoribosylaminoimidazole_succinocarboxamide_synthase_(EC_6.3.2.6)	3.51586	4.44358	0.0122836	0.0844087
k119_389871	Sphingomonadaceae	Nucleosides_and_Nucleotides	De_Novo_Purine_Biosynthesis	Phosphoribosylaminoimidazole_succinocarboxamide_synthase_(EC_6.3.2.6)	3.70139	3.88606	0.0117502	0.082488
k119_77103	Proteobacteria	Nucleosides_and_Nucleotides	De_Novo_Purine_Biosynthesis	Phosphoribosylformylglycinamidine_synthase_synthetase_subunit_(EC_6.3.5.3)	2.53116	4.66275	0.00445151	0.0502506
k119_181950	Rubrobacter radiotolerans	Nucleosides_and_Nucleotides	De_Novo_Purine_Biosynthesis	Phosphoribosylformylglycinamidine_synthase_synthetase_subunit_(EC_6.3.5.3)	2.66482	4.57207	0.0164663	0.0990445
k119_566530	Rubrobacter	Nucleosides_and_Nucleotides	De_Novo_Purine_Biosynthesis	Phosphoribosylformylglycinamidine_synthase_synthetase_subunit_(EC_6.3.5.3)	4.4065	3.99939	0.00526627	0.0545797
k119_497832	Rubrobacter	Nucleosides_and_Nucleotides	De_Novo_Purine_Biosynthesis	Phosphoribosylformylglycinamidine_synthase_synthetase_subunit_(EC_6.3.5.3)	3.53685	3.7653	0.00847349	0.0697011
k119_256480	Rubrobacter	Nucleosides_and_Nucleotides	De_Novo_Pyrimidine_Synthesis	Uracil_phosphoribosyltransferase_(EC_2.4.2.9)	7.40236	4.52029	0.000114821	0.00724557
k119_335986	Rubrobacter	Nucleosides_and_Nucleotides	De_Novo_Pyrimidine_Synthesis	Uracil_phosphoribosyltransferase_(EC_2.4.2.9)	3.14633	4.2739	0.00520746	0.05437
k119_338491	Rubrobacter aplysinae	Nucleosides_and_Nucleotides	Hydantoin_metabolism	Deacetylases_including_yeast_histone_deacetylase_and_acetoin_utilization_protein	3.22109	5.12963	0.00390295	0.0468875
k119_166146	Rubrobacter	Nucleosides_and_Nucleotides	Novel_non_oxidative_pathway_of_Uracil_catabolism	Possible_pyrimidine_permease_in_reductive_pathway	4.54037	3.76275	0.00984807	0.0751779
k119_97575	Rubrobacter xylanophilus	Nucleosides_and_Nucleotides	Purine_conversions	Adenine_phosphoribosyltransferase_(EC_2.4.2.7)	2.39196	4.94748	0.00856371	0.0701724
k119_114151	Rubrobacter	Nucleosides_and_Nucleotides	Purine_conversions	Adenine_phosphoribosyltransferase_(EC_2.4.2.7)	2.34182	4.18821	0.00676685	0.0622615
k119_547826	Bacteria	Nucleosides_and_Nucleotides	Purine_conversions	Adenosine_deaminase_(EC_3.5.4.4)	3.75189	5.86808	0.000311987	0.0130775
k119_81450	Actinobacteria	Nucleosides_and_Nucleotides	Purine_conversions	Adenosine_deaminase_(EC_3.5.4.4)	4.264	5.00142	0.00575637	0.0571338
k119_76022	Rubrobacter	Nucleosides_and_Nucleotides	Purine_conversions	Adenylate_kinase_(EC_2.7.4.3)	9.07087	3.91697	0.000326438	0.0133761
k119_334820	Rubrobacter	Nucleosides_and_Nucleotides	Purine_conversions	Deoxyguanosinetriphosphate_triphosphohydrolase_(EC_3.1.5.1)	5.66963	6.4381	1.79201e-05	0.00217531
k119_81339	Rubrobacter	Nucleosides_and_Nucleotides	Purine_conversions	Deoxyguanosinetriphosphate_triphosphohydrolase_(EC_3.1.5.1)	2.3702	4.92645	0.00526977	0.0545996
k119_391442	Rubrobacter	Nucleosides_and_Nucleotides	Purine_conversions	Deoxyguanosinetriphosphate_triphosphohydrolase_(EC_3.1.5.1)	2.60399	4.68564	0.0146111	0.0927396
k119_443873	Acidobacteria	Nucleosides_and_Nucleotides	Purine_conversions	Deoxyguanosinetriphosphate_triphosphohydrolase_(EC_3.1.5.1)	2.90266	4.47245	0.00919916	0.0726441
k119_120666	Sphingomonadales	Nucleosides_and_Nucleotides	Purine_conversions	GMP_synthase_[glutamine_hydrolyzing]_(EC_6.3.5.2)	4.56064	4.85781	0.00797466	0.0677165
k119_585846	Rubrobacter	Nucleosides_and_Nucleotides	Purine_conversions	GMP_synthase_[glutamine_hydrolyzing]_(EC_6.3.5.2)	2.76202	4.30038	0.0108425	0.0788737
k119_436641	Rubrobacter	Nucleosides_and_Nucleotides	Purine_conversions	GMP_synthase_[glutamine_hydrolyzing]_(EC_6.3.5.2)	4.00776	4.27985	0.00551702	0.0558464
k119_266948	Rubrobacter	Nucleosides_and_Nucleotides	Purine_conversions	GMP_synthase_[glutamine_hydrolyzing]_(EC_6.3.5.2)	2.27484	4.25125	0.00868922	0.0707533
k119_254799	Rubrobacter	Nucleosides_and_Nucleotides	Purine_conversions	GMP_synthase_[glutamine_hydrolyzing]_(EC_6.3.5.2)	2.98829	3.83932	0.0131318	0.087625
k119_573553	Rubrobacter	Nucleosides_and_Nucleotides	Purine_conversions	Hypoxanthine_guanine_phosphoribosyltransferase_(EC_2.4.2.8)	5.21033	5.58131	0.000265529	0.0118915
k119_99147	Rubrobacter	Nucleosides_and_Nucleotides	Purine_conversions	Hypoxanthine_guanine_phosphoribosyltransferase_(EC_2.4.2.8)	2.87628	4.95293	0.00149722	0.0293834
k119_295487	Rubrobacter xylanophilus	Nucleosides_and_Nucleotides	Purine_conversions	Hypoxanthine_guanine_phosphoribosyltransferase_(EC_2.4.2.8)	3.42784	4.77655	0.0044624	0.0503119
k119_111736	Rubrobacter	Nucleosides_and_Nucleotides	Purine_conversions	Hypoxanthine_guanine_phosphoribosyltransferase_(EC_2.4.2.8)	7.72094	4.27895	0.000851738	0.0223008
k119_224624	Rubrobacter	Nucleosides_and_Nucleotides	Purine_conversions	Hypoxanthine_guanine_phosphoribosyltransferase_(EC_2.4.2.8)	3.0412	3.9122	0.00809906	0.0682408
k119_20519	Rubrobacter	Nucleosides_and_Nucleotides	Purine_conversions	Nucleoside_diphosphate_kinase_(EC_2.7.4.6)	4.12031	5.63196	0.000478651	0.0163433
k119_55175	Rubrobacter	Nucleosides_and_Nucleotides	Purine_conversions	Nucleoside_diphosphate_kinase_(EC_2.7.4.6)	3.31886	4.92319	0.013186	0.0877489
k119_242559	Rubrobacter	Nucleosides_and_Nucleotides	Purine_conversions	Nucleoside_diphosphate_kinase_(EC_2.7.4.6)	2.57241	4.86653	0.00828283	0.068945
k119_193200	Rubrobacter xylanophilus	Nucleosides_and_Nucleotides	Purine_conversions	Nucleotide_pyrophosphatase_(EC_3.6.1.9)	7.89229	6.08677	7.06447e-05	0.00535407
k119_212399	Rubrobacter	Nucleosides_and_Nucleotides	Purine_conversions	Polyphosphate_kinase_(EC_2.7.4.1)	2.30516	4.60453	0.00383092	0.0465596
k119_368956	Rubrobacter	Nucleosides_and_Nucleotides	Purine_conversions	Polyphosphate_kinase_(EC_2.7.4.1)	3.98735	3.87816	0.00467136	0.0514358
k119_388748	Sphingomonadaceae	Nucleosides_and_Nucleotides	Purine_de_novo_biosynthesis_in_plants	Ribonucleotide_reductase_of_class_Ia_(aerobic)_beta_subunit_(EC_1.17.4.1)	4.51307	5.69433	0.000399431	0.0148274
k119_471361	Rubrobacter	Nucleosides_and_Nucleotides	Purine_Utilization	Cytosine/purine/uracil/thiamine/allantoin_permease_family_protein	3.59949	3.76383	0.0146963	0.0930088
k119_470004	Rubrobacter	Nucleosides_and_Nucleotides	Purine_Utilization	Cytosine/purine/uracil/thiamine/allantoin_permease_family_protein	4.93627	3.76371	0.00823615	0.0687839
k119_532103	Actinobacteria <phylum>	Nucleosides_and_Nucleotides	Purine_Utilization	Xanthine_dehydrogenase_FAD_binding_subunit_(EC_1.17.1.4)	2.95458	4.10753	0.00959261	0.0741713
k119_514183	Rubrobacter	Nucleosides_and_Nucleotides	Purine_Utilization	Xanthine_dehydrogenase_molybdenum_binding_subunit_(EC_1.17.1.4)	4.23624	4.13706	0.00154319	0.0297841
k119_408401	Terrabacteria group	Nucleosides_and_Nucleotides	Purine_Utilization	Xanthine_permease	3.02837	5.46996	0.00158868	0.0301397
k119_521415	Actinobacteria <phylum>	Nucleosides_and_Nucleotides	Purine_Utilization	Xanthine_permease	4.86036	5.37715	0.00229695	0.0364463
k119_426980	Rubrobacter radiotolerans	Nucleosides_and_Nucleotides	Purine_Utilization	Xanthine/uracil/thiamine/ascorbate_permease_family_protein	2.94784	5.38649	0.00122108	0.0264663
k119_302834	Rubrobacter radiotolerans	Nucleosides_and_Nucleotides	Purine_Utilization	Xanthine/uracil/thiamine/ascorbate_permease_family_protein	6.32602	3.94167	0.00243872	0.0374028
k119_456153	Actinobacteria <phylum>	Nucleosides_and_Nucleotides	pyrimidine_conversions	Deoxycytidine_triphosphate_deaminase_(EC_3.5.4.30)_(dUMP_forming)	3.15851	5.28813	0.00317966	0.042512
k119_267819	Actinobacteria	Nucleosides_and_Nucleotides	pyrimidine_conversions	Deoxycytidine_triphosphate_deaminase_(EC_3.5.4.30)_(dUMP_forming)	3.20132	4.68683	0.00799155	0.067794
k119_392956	Streptomyces	Nucleosides_and_Nucleotides	pyrimidine_conversions	Deoxycytidine_triphosphate_deaminase_(EC_3.5.4.30)_(dUMP_forming)	3.36217	4.15438	0.0054595	0.0555564
k119_534483	Actinobacteria <phylum>	Nucleosides_and_Nucleotides	pyrimidine_conversions	Thioredoxin_reductase_(EC_1.8.1.9)	3.45187	5.31038	0.00329069	0.0432333
k119_40897	Terrabacteria group	Nucleosides_and_Nucleotides	pyrimidine_conversions	Thioredoxin_reductase_(EC_1.8.1.9)	4.38202	5.26341	0.00256288	0.0382314
k119_75903	Terrabacteria group	Nucleosides_and_Nucleotides	pyrimidine_conversions	Thioredoxin_reductase_(EC_1.8.1.9)	3.77186	5.16267	0.00062255	0.0188748
k119_163335	Bacteria	Nucleosides_and_Nucleotides	pyrimidine_conversions	Thioredoxin_reductase_(EC_1.8.1.9)	4.31326	4.79619	0.00215559	0.0352036
k119_226004	Burkholderiaceae	Nucleosides_and_Nucleotides	pyrimidine_conversions	Thioredoxin_reductase_(EC_1.8.1.9)	2.15662	4.55501	0.013907	0.0904141
k119_364339	cellular organisms	Nucleosides_and_Nucleotides	pyrimidine_conversions	Thioredoxin_reductase_(EC_1.8.1.9)	15.052	4.4909	1.48123e-05	0.00189115
k119_112006	Actinobacteria <phylum>	Nucleosides_and_Nucleotides	pyrimidine_conversions	Thioredoxin_reductase_(EC_1.8.1.9)	4.75487	4.46851	0.00817186	0.0685827
k119_287083	Actinobacteria <phylum>	Nucleosides_and_Nucleotides	pyrimidine_conversions	Thioredoxin_reductase_(EC_1.8.1.9)	2.49902	4.464	0.0164499	0.0990021
k119_541440	unclassified Actinobacteria	Nucleosides_and_Nucleotides	pyrimidine_conversions	Thioredoxin_reductase_(EC_1.8.1.9)	5.66949	4.37811	0.0110611	0.0797726
k119_226760	Rubrobacter	Nucleosides_and_Nucleotides	pyrimidine_conversions	Thioredoxin_reductase_(EC_1.8.1.9)	3.69284	4.09237	0.00520928	0.05437
k119_552288	Cyanobacteria	Nucleosides_and_Nucleotides	pyrimidine_conversions	Thioredoxin_reductase_(EC_1.8.1.9)	2.4395	3.83836	0.0132976	0.0882081
k119_46784	Nitrospira	Nucleosides_and_Nucleotides	pyrimidine_conversions	Thioredoxin_reductase_(EC_1.8.1.9)	5.08398	3.79206	0.00329424	0.0432601
k119_98691	Rubrobacter	Nucleosides_and_Nucleotides	pyrimidine_conversions	Thioredoxin_reductase_(EC_1.8.1.9)	3.96197	3.30449	0.0127557	0.0862755
k119_479527	Archaea	Nucleosides_and_Nucleotides	pyrimidine_conversions	Thymidylate_kinase_(EC_2.7.4.9)	4.35775	4.68948	0.00135654	0.0278832
k119_170103	Archaea	Nucleosides_and_Nucleotides	pyrimidine_conversions	Thymidylate_kinase_(EC_2.7.4.9)	4.48302	4.27027	0.00545298	0.055527
k119_158289	Archaea	Nucleosides_and_Nucleotides	pyrimidine_conversions	Thymidylate_kinase_(EC_2.7.4.9)	2.69404	4.18576	0.00674009	0.0621395
k119_510442	Bacteria	Nucleosides_and_Nucleotides	pyrimidine_conversions	Thymidylate_kinase_(EC_2.7.4.9)	6.59711	4.02378	0.00350939	0.044674
k119_517740	Rubrobacter	Nucleosides_and_Nucleotides	pyrimidine_conversions	Thymidylate_kinase_(EC_2.7.4.9)	12.0084	2.60855	0.0134257	0.0886579
k119_95871	Rubrobacter	Nucleosides_and_Nucleotides	Ribonucleotide_reduction	Ribonucleotide_reductase_of_class_II_(coenzyme_B12_dependent)_(EC_1.17.4.1)	2.3409	4.88814	0.00662091	0.0614939
k119_571364	Rubrobacter	Nucleosides_and_Nucleotides	Ribonucleotide_reduction	Ribonucleotide_reductase_of_class_II_(coenzyme_B12_dependent)_(EC_1.17.4.1)	6.90775	4.39539	6.40406e-05	0.00503213
k119_416116	Rubrobacter	Nucleosides_and_Nucleotides	Ribonucleotide_reduction	Ribonucleotide_reductase_of_class_II_(coenzyme_B12_dependent)_(EC_1.17.4.1)	2.89712	4.31709	0.00707361	0.0635707
k119_494917	Rubrobacter	Nucleosides_and_Nucleotides	Ribonucleotide_reduction	Ribonucleotide_reductase_of_class_II_(coenzyme_B12_dependent)_(EC_1.17.4.1)	4.47632	4.30453	0.00295375	0.0408506
k119_373720	Archaea	Nucleosides_and_Nucleotides	Ribonucleotide_reduction	Ribonucleotide_reductase_of_class_II_(coenzyme_B12_dependent)_(EC_1.17.4.1)	8.5782	4.14285	0.00261606	0.0386433
k119_114510	Rubrobacter	Nucleosides_and_Nucleotides	Ribonucleotide_reduction	Ribonucleotide_reductase_of_class_II_(coenzyme_B12_dependent)_(EC_1.17.4.1)	4.02192	4.06639	0.00505246	0.0534727
k119_472826	Rubrobacter	Nucleosides_and_Nucleotides	Ribonucleotide_reduction	Ribonucleotide_reductase_of_class_II_(coenzyme_B12_dependent)_(EC_1.17.4.1)	3.52764	4.06526	0.00356498	0.0450078
k119_1783	Rubrobacter	Nucleosides_and_Nucleotides	Ribonucleotide_reduction	Ribonucleotide_reductase_of_class_II_(coenzyme_B12_dependent)_(EC_1.17.4.1)	3.76521	3.94327	0.0137405	0.0897907
k119_103342	Solirubrobacterales	Nucleosides_and_Nucleotides	Ribonucleotide_reduction	Ribonucleotide_reductase_of_class_II_(coenzyme_B12_dependent)_(EC_1.17.4.1)	3.63428	3.89922	0.0160773	0.0977401
k119_291678	Rubrobacter	Nucleosides_and_Nucleotides	Ribonucleotide_reduction	Ribonucleotide_reductase_of_class_II_(coenzyme_B12_dependent)_(EC_1.17.4.1)	7.27699	3.57609	0.00558708	0.0562105
k119_567651	Rubrobacter	Nucleosides_and_Nucleotides	Ribonucleotide_reduction	Ribonucleotide_reductase_of_class_II_(coenzyme_B12_dependent)_(EC_1.17.4.1)	6.98105	3.39545	0.00126329	0.0268405
k119_489648	Rubrobacter	Nucleosides_and_Nucleotides	Ribonucleotide_reduction	Ribonucleotide_reductase_of_class_II_(coenzyme_B12_dependent)_(EC_1.17.4.1)	5.03359	3.1222	0.0082544	0.0688136
k119_45375	Bacteria	Nucleosides_and_Nucleotides	Ribonucleotide_reduction	Ribonucleotide_reductase_of_class_II_(coenzyme_B12_dependent)_(EC_1.17.4.1)	6.55533	3.03879	0.0141244	0.0911739
[truncated: 1,969 more rows]
